# Supplementary material for: WhyD tailors surface polymers to prevent premature bacteriolysis and direct cell elongation in Streptococcus pneumoniae
Source: eLife journal article supplement (doi:10.7554/elife.76392), 2022-05-20
Supplement: fig5-data1 [file Figure 5B_source data_.xlsx]

## Sheet: wt
cell area	cell length	cell width		cell area mean:	1.7042		cell area std dev:	0.4527
1.91728	1.97223	1.08119		cell length mean:	1.9466		cell length std dev:	0.4028
2.3674	2.42966	1.07299		cell width mean:	0.9755		cell width std dev:	0.086
1.65003	2.0098	0.93448
1.96961	2.13388	1.05227
1.67906	2.13974	0.919314
1.48547	1.77036	0.935066
1.41894	1.65991	0.945907
1.48018	1.83245	0.949684
1.59522	1.89219	0.907722
1.42936	1.55221	1.00042
1.69368	1.95759	0.97011
1.50435	1.99878	0.879568
1.69196	1.7941	1.02796
1.56118	1.82024	0.947187
1.85307	2.0169	1.04485
1.89599	1.98167	1.04166
2.22728	2.51411	0.964863
1.7483	1.84127	1.04029
1.90023	2.07406	1.02344
2.06868	2.12554	1.07906
1.99399	2.2153	0.992547
1.46605	1.77718	0.920406
2.24288	2.58669	0.984785
2.75428	2.68182	1.11433
1.83828	2.30923	0.889167
1.97926	2.00506	1.09237
1.88741	2.24554	0.920037
1.76023	1.8952	1.03572
1.83316	2.08678	0.980276
1.85593	2.06508	0.989696
2.46804	2.5462	1.10371
2.12783	2.54893	0.922035
1.16969	1.39049	0.930442
2.06027	2.54575	0.917003
1.46831	1.64943	1.002
2.14448	2.1334	1.1291
1.59981	1.90808	0.923686
1.48937	1.83783	0.978146
1.71341	1.77571	1.07633
2.87306	2.89154	1.09575
2.07848	2.22639	1.07764
1.24144	1.57613	0.907671
2.48071	2.49423	1.09285
2.20159	2.44533	1.00307
1.89002	2.04019	1.06315
1.81983	2.08942	0.962182
1.83397	1.98663	0.99532
2.64136	2.7865	1.04156
1.77231	2.0689	0.953137
1.55065	1.8769	0.899263
1.96782	2.1152	1.03065
1.06279	1.46053	0.811167
1.84117	2.01372	1.03884
1.35683	1.71621	0.899615
1.62996	1.90758	0.950836
1.59775	1.89371	0.938034
1.41926	1.69911	0.977308
0.985432	1.32868	0.821683
2.09923	2.53209	0.933641
1.86895	2.2298	1.02415
2.49963	2.76695	0.989667
1.83268	2.2137	0.905337
1.63124	2.05982	0.93038
2.00105	2.22444	1.03515
1.71917	2.10047	0.911602
2.24201	2.26926	1.12977
1.63647	2.18712	0.807351
1.83546	1.96708	1.04976
2.56688	2.60979	1.07847
2.44236	2.38804	1.12221
2.49604	2.49094	1.10472
2.75889	2.65271	1.15116
1.70017	1.76752	1.06903
2.94646	3.43951	0.930402
1.84793	2.00632	1.03012
3.11182	2.78732	1.21803
2.00925	2.22742	0.995983
2.44954	2.46506	1.11006
1.55354	1.75168	1.02493
1.78955	2.04221	0.981618
2.74043	2.93385	1.0243
1.26963	1.74987	0.805733
1.30344	1.73815	0.828337
1.68233	1.81886	1.02521
1.8022	1.89797	1.08078
1.91685	2.0129	1.0723
1.53597	1.80954	0.956041
1.87047	1.96926	1.05457
1.35628	1.61852	0.919839
1.92729	2.27572	0.970719
1.33917	1.59388	0.948685
1.32202	1.64122	0.885694
1.1681	1.38729	0.948563
1.4777	1.70561	0.977927
1.59867	1.93789	0.903007
1.88989	2.06505	1.01884
2.04591	2.11578	1.10837
2.29421	2.32512	1.14758
2.67822	2.81396	1.04461
1.62941	1.92405	0.958083
2.50392	2.67974	1.065
2.73366	2.65829	1.1311
2.578	2.92656	0.997614
1.30564	1.49411	0.967708
2.60612	3.1339	0.930213
2.85814	2.90726	1.07728
1.84684	1.79285	1.12171
1.44765	1.78524	0.89219
2.38821	2.44821	1.08215
2.49745	2.86648	0.978828
1.33236	1.62424	0.932029
1.45337	1.98527	0.816341
2.1563	2.59688	0.936175
1.49451	1.56699	1.07428
1.36782	1.78671	0.87128
1.47049	1.89457	0.884526
1.5674	1.7916	0.991999
2.17394	2.51106	0.979335
1.54362	1.80183	0.986719
2.24708	2.48221	1.00637
1.65275	1.82868	1.02028
2.53079	2.99463	0.919722
2.32103	2.54549	1.02802
2.16365	2.23666	1.06204
2.17152	2.5842	0.943461
2.43797	2.58392	1.03711
1.62937	1.76523	1.04171
1.65563	1.73848	1.06202
2.35594	2.37198	1.09375
2.07549	2.32316	0.988926
1.30671	1.57911	0.915057
2.34614	2.50758	1.04824
1.99419	2.08118	1.04144
1.56149	1.86374	0.939965
1.67162	1.69524	1.08304
1.54758	1.77853	0.979549
1.66529	1.838	1.01036
1.95522	2.16914	1.05643
1.79255	2.02663	1.01607
2.27817	2.34897	1.05949
1.17738	1.57806	0.88088
2.29085	2.43025	1.06056
2.23668	2.44833	1.00417
2.16242	2.18104	1.14958
1.4246	1.65503	0.945511
1.43209	1.67506	0.967911
2.03454	2.05596	1.11229
1.8836	2.18046	0.989492
1.91276	2.07611	1.01877
1.82285	1.98521	1.04701
1.26308	1.52018	0.93175
2.24082	2.31885	1.07044
2.11346	2.01355	1.18356
3.07857	2.92735	1.14966
1.37373	1.77705	0.889761
2.99271	2.70601	1.23177
1.50321	1.76224	0.962839
2.20309	2.22795	1.12116
1.51853	1.8433	0.899816
2.38168	2.12124	1.26547
1.76231	1.8144	1.08009
2.37739	2.55812	1.02825
1.43327	1.97999	0.830062
1.45853	1.57547	1.03589
1.45759	1.72084	0.94396
2.61505	2.67902	1.09887
2.50357	2.51866	1.11341
1.64787	1.77169	1.03518
1.41929	1.738	0.927341
2.14657	2.27362	1.03996
1.23719	1.46235	0.935638
2.37294	2.4597	1.06734
1.57709	1.69347	1.03471
1.84944	2.12781	0.980396
2.26128	2.39187	1.04711
1.43459	1.48876	1.04107
1.49946	1.84362	0.907717
1.68696	1.90592	1.00207
1.62016	1.92732	0.934813
2.46788	2.39851	1.15516
2.28978	2.33681	1.13043
2.55745	2.72804	1.02787
2.3911	2.58808	1.02023
2.19314	2.70891	0.88409
2.09924	2.27031	1.0622
1.82583	2.17491	1.00686
1.92888	2.20315	0.964582
2.04221	2.13214	1.06388
2.05668	2.1078	1.06993
2.36971	2.53877	1.01673
1.85368	1.98986	1.00734
1.94936	2.15012	1.0831
2.43077	2.74973	0.967561
1.75028	1.93571	1.00584
2.35995	2.42922	1.1268
2.86359	2.88568	1.0792
2.50667	2.6751	1.00375
2.30942	2.47476	1.0328
2.23913	2.40662	1.06058
2.26568	2.33523	1.07565
1.33142	1.72838	0.881615
1.45207	1.64485	0.982544
1.67421	1.95029	0.99636
2.52889	2.59177	1.07484
2.41204	2.2906	1.16553
1.48937	1.69198	0.993304
1.96681	2.15265	1.04327
1.39455	1.71315	0.908129
1.20865	1.51544	0.893603
1.90336	1.9917	1.12074
1.94051	2.21428	0.967659
2.04899	2.0752	1.12276
1.39475	1.67998	0.959353
1.91671	2.49217	0.892699
2.19263	2.46166	0.981275
1.85809	2.13145	0.998733
1.65958	1.9543	0.946151
1.68551	1.75444	1.09641
1.38418	1.72561	0.893916
1.80964	1.90098	1.06568
1.68304	1.88023	1.00954
1.61007	1.93415	0.897806
1.55433	1.77481	0.964458
2.39483	2.47551	1.08795
1.42522	1.74192	0.910488
1.5983	1.76918	0.983938
2.18818	2.71709	0.91836
1.64618	1.88963	1.01327
2.46129	2.44657	1.10508
1.44059	1.60778	0.967491
1.9422	2.26373	0.952127
1.68473	1.82815	1.03165
1.6155	1.85607	0.972471
1.81073	2.14056	0.963531
1.65653	1.91442	0.985329
2.72299	2.761	1.0978
2.00847	2.29365	0.972363
1.79901	2.05818	0.964186
2.03685	2.32358	1.05443
2.82319	2.86272	1.09173
1.397	1.64335	0.948532
1.66221	1.92333	0.945849
1.66475	2.01955	0.920578
2.72862	2.97409	1.0037
2.05728	2.29398	0.985174
1.64578	1.84342	0.993875
1.84623	2.19876	0.95767
1.44048	1.83391	0.883008
2.23345	2.60768	0.976394
2.14706	2.32802	1.04682
1.11263	1.48911	0.833357
1.60278	1.87604	0.934362
2.58771	2.51818	1.12871
2.30619	2.30448	1.11127
1.04834	1.30926	0.870951
1.45353	1.87509	0.848815
1.86294	2.00626	1.02092
1.60974	1.78726	1.02742
2.03331	2.07644	1.10271
2.01564	2.35796	0.968536
2.49809	2.42708	1.11883
2.79861	2.93624	1.1373
1.35421	1.45754	1.03256
1.69742	1.98111	0.952243
1.84421	2.109	0.971395
1.89973	2.16078	0.986654
1.99488	2.61918	0.881996
1.75712	1.92473	1.01174
2.85503	2.87087	1.08948
1.84732	2.04023	1.01601
1.68642	1.89748	0.987767
1.4473	1.71481	0.948605
1.6775	1.96266	0.963397
2.08626	2.11944	1.10248
2.70288	2.50213	1.18317
1.98325	2.06353	1.07613
1.69036	2.03898	0.924382
2.64734	2.52816	1.17032
1.23806	1.62313	0.843708
1.69956	2.14332	0.882826
1.31628	1.67957	0.86215
2.84637	2.66066	1.17627
1.43057	1.71631	0.943265
2.21796	2.76734	0.878921
2.55329	3.08834	0.920045
1.3045	1.71883	0.878116
2.06348	2.04777	1.15024
1.19115	1.61704	0.870165
1.43786	1.60398	0.972591
1.53957	1.88915	0.904338
1.19143	1.46627	0.950038
1.47548	1.58246	1.02634
1.44612	1.65998	0.992353
1.87754	1.93458	1.13183
1.68549	1.81337	1.04405
1.506	1.72455	1.01014
1.60862	1.85219	0.952957
1.61266	1.85113	0.972599
1.28039	1.70373	0.835553
1.49035	1.7375	1.01156
1.15477	1.61601	0.792168
1.96233	2.27543	0.982029
1.59822	1.82601	0.954123
2.52741	2.85188	0.967922
1.22961	1.70815	0.833033
1.41853	1.80575	0.861941
2.38234	2.37345	1.0966
2.23862	2.2615	1.08759
1.8252	2.06582	0.982044
1.90133	2.15123	0.9764
1.60467	1.77177	1.01531
2.10363	2.17763	1.06407
1.30452	1.58848	0.905599
2.04435	2.09738	1.09582
1.86003	2.08663	0.991321
2.14889	2.15354	1.09029
2.63265	2.67452	1.07419
2.02021	2.16282	1.04344
2.44368	2.36417	1.16477
1.95483	1.94166	1.12647
2.12694	2.13997	1.13386
1.45572	1.5844	1.02502
1.6751	1.83485	1.01805
1.61842	1.94976	0.937259
2.67464	2.63105	1.13701
2.21205	2.38793	1.04133
1.80056	1.97753	1.00872
2.29123	2.67689	0.942231
2.66896	2.76638	1.05989
2.54304	2.51695	1.09519
1.53853	1.76253	0.968453
1.57465	1.80784	0.956002
2.62866	2.82233	1.01757
2.78552	2.90246	1.04782
2.56645	2.60206	1.07565
1.33071	1.54719	0.945508
1.66205	1.78917	1.03322
1.5037	1.67664	1.00336
2.12369	2.14244	1.14505
1.6933	1.80182	1.05375
2.74161	2.91963	1.02905
2.83161	2.9878	1.03968
2.22958	2.23034	1.09968
1.86171	2.12032	1.057
1.60438	1.9437	0.991831
1.95077	2.04383	1.06122
2.07753	2.19857	1.02828
1.42261	1.68516	0.947171
1.68394	2.03626	0.94894
1.5584	1.95181	0.90206
1.5013	1.65003	1.01883
1.59377	1.78488	1.00476
1.41603	1.67481	1.01944
1.65285	1.83028	0.993752
1.4534	1.56256	1.00039
1.48254	1.69086	0.97804
1.77435	2.00048	0.968515
1.19282	1.38196	0.969377
1.30002	1.63151	0.882706
3.00715	2.98123	1.09825
2.71277	2.69536	1.11192
1.72363	1.85006	1.02921
2.55563	2.58396	1.07477
1.70927	1.77766	1.07029
1.35867	1.75646	0.88341
1.73484	1.73156	1.14515
1.51919	1.73217	0.966532
1.68977	1.89703	0.99901
1.88984	2.10033	1.01932
1.63111	1.95252	0.921157
1.6323	2.07736	0.909344
2.3154	2.48073	1.04451
1.83364	2.04554	1.00718
2.35682	2.34682	1.11974
2.16202	2.20219	1.08629
1.76208	1.96044	1.00253
2.87149	2.82435	1.16007
3.21731	3.04244	1.19343
1.80336	1.68284	1.19279
2.42934	2.41129	1.10957
1.74613	1.96902	0.977676
2.00605	2.21503	1.02366
2.65513	2.78075	1.09259
2.14971	2.21587	1.06184
1.94404	2.00302	1.08597
1.53972	1.57808	1.07278
1.61335	1.80863	1.02302
2.73975	3.1629	0.969434
2.29308	2.33653	1.11044
2.22182	2.46577	1.09442
2.57271	2.81463	0.997634
2.40087	2.48138	1.13755
1.71446	1.85847	1.07107
1.28739	1.5327	0.981915
1.61654	1.70742	1.05137
2.5186	2.80626	1.03833
2.64345	2.70497	1.08087
1.82799	1.86739	1.07861
1.95178	2.02846	1.10458
2.58272	2.6338	1.1536
2.78048	2.91664	1.04298
1.40422	1.62841	0.978192
2.61667	2.60645	1.10585
2.57369	2.6516	1.06782
1.6925	1.71589	1.14654
1.33242	1.65559	0.923308
2.94654	2.95392	1.08839
2.92894	2.88774	1.11232
1.70105	1.84763	1.03398
1.57107	1.77121	1.00543
1.5571	1.91793	0.88808
3.07626	2.98868	1.12555
1.98435	2.25642	0.963642
2.74395	3.11279	0.978296
1.42113	1.6347	0.975242
1.27858	1.56858	0.987728
1.46241	1.58013	1.04366
2.82479	2.93476	1.05638
1.90957	1.92059	1.14906
1.58137	1.65483	1.05766
1.51892	1.61695	1.03195
2.79336	2.69466	1.18673
2.85802	2.93899	1.1428
1.96132	1.96353	1.12667
2.00453	2.00889	1.09309
1.42348	2.03051	0.815523
1.48041	1.97392	0.827731
2.34324	2.33486	1.10865
2.15873	2.4369	1.02357
3.20785	3.21914	1.08715
1.91891	2.102	1.02767
2.04078	2.35123	0.983645
1.37365	1.6573	0.912986
1.44727	1.81626	1.04285
1.78028	2.08739	0.992886
1.68935	1.83075	1.04264
1.48613	1.59586	1.02439
1.78499	1.77943	1.14775
2.34328	2.17232	1.19812
2.37016	2.3964	1.10962
1.96147	2.08133	1.15803
2.10657	2.20769	1.08911
2.08284	1.85309	1.25235
2.33131	2.29271	1.12684
2.05883	2.12192	1.08052
2.151	2.1899	1.11698
1.99398	2.23355	1.05313
2.1094	2.40815	1.01747
1.62041	1.75054	1.01909
1.48125	1.83271	0.904369
2.01563	1.96082	1.14479
1.21679	1.51903	0.969058
1.35882	1.4839	1.05941
2.86507	2.97768	1.07258
1.23991	1.48117	0.976122
1.69936	1.69647	1.09603
1.54621	1.85524	1.03997
1.58696	1.79545	1.06354
1.61676	1.79243	0.989955
1.25526	1.37809	0.986845
1.41816	1.60146	0.970706
2.56338	2.70061	1.05361
1.31234	1.49268	0.977218
1.78035	2.0403	0.969709
1.23433	1.64404	0.832697
1.53055	1.80799	0.940913
1.75532	2.02036	0.974636
1.23859	1.57573	0.86835
1.28175	1.64076	0.862111
1.60398	1.69908	1.04893
2.65759	2.99782	0.979824
1.05719	1.32615	0.862473
1.44787	1.80962	0.896816
1.62475	1.82426	0.9892
1.76003	2.02651	0.972688
1.24996	1.49325	0.947125
1.81543	1.96583	1.01785
2.23923	2.3763	1.04437
1.37472	1.75531	0.904709
1.87167	1.9962	1.04634
1.3999	1.59861	0.98308
1.43813	1.76889	0.97547
2.30064	2.41727	1.06269
2.09335	2.47871	0.929678
1.82934	2.23803	0.9
2.20931	2.33078	1.04919
1.41181	1.6773	0.932227
1.27417	1.49933	0.974795
2.70272	2.69249	1.11631
2.13003	2.23161	1.06014
1.92362	2.14923	1.00748
1.48267	1.9078	0.850419
1.26475	1.74351	0.805897
2.76412	2.74377	1.10041
1.42071	1.62579	0.960158
1.34741	1.66262	0.914937
1.4018	1.80174	0.845311
1.83481	2.29118	0.879108
1.36518	1.49297	1.02039
1.15056	1.55925	0.821839
1.29727	1.6209	0.879772
1.45783	1.94484	0.813404
1.24599	1.57127	0.883821
1.0904	1.5215	0.800564
1.87702	2.22176	0.935058
1.95799	2.28932	0.94117
1.36818	1.71417	0.901413
1.47387	1.84276	0.889138
2.51894	2.70888	1.034
1.98677	2.26122	0.971369
1.44737	1.80863	0.887544
1.60787	1.98097	0.901956
1.60222	1.87988	0.943392
1.82675	2.13722	0.949191
2.04536	2.29944	0.993109
1.75124	2.04934	0.944061
2.43869	2.60995	1.04479
1.0285	1.44752	0.788236
1.48229	1.53096	1.05549
2.05221	2.29295	0.990335
1.23293	1.60154	0.887587
2.35122	2.42484	1.11015
1.63259	1.76948	1.04024
1.9185	2.04707	1.11103
2.54145	2.7137	1.01962
1.33247	1.68755	0.902233
2.37078	2.77112	0.939014
1.42604	1.6047	0.981342
0.937646	1.35324	0.769545
1.74672	1.89443	1.05786
1.08371	1.26432	0.951376
1.12092	1.42287	0.86804
1.70447	2.03831	0.984288
0.970535	1.24918	0.830163
1.28978	1.49923	0.955831
1.61747	1.83439	0.994861
1.55367	1.69626	1.0215
1.75857	1.8537	1.04764
2.66147	3.00396	0.976083
1.38181	1.77609	0.961942
1.33585	1.82341	0.85045
1.77826	2.05944	0.996603
2.68495	2.90513	1.01454
1.95848	2.03727	1.0814
1.40496	1.64968	0.956819
1.86797	1.99211	1.04648
1.08547	1.50736	0.833406
1.40049	1.97381	0.800032
1.42596	1.63441	0.973558
1.49464	1.85666	0.885892
1.33335	1.6361	0.906134
1.30961	1.61003	0.897194
1.23501	1.66379	0.834731
2.1925	2.26519	1.06297
1.27375	1.62919	0.878901
2.38842	2.73978	0.961951
1.41503	1.67584	0.954238
1.79718	1.75977	1.13837
1.18714	1.52833	0.882882
1.35262	1.55293	0.970334
2.15454	2.52939	0.938101
1.70647	1.8639	1.01354
1.09933	1.52007	0.799538
1.39264	1.83573	0.847188
1.92193	2.14561	1.01035
1.67978	1.8126	1.03022
1.10212	1.4042	0.871784
1.8886	1.98576	1.06248
1.09249	1.54022	0.806578
1.49879	1.89331	0.877993
1.49193	1.61413	1.01782
1.08799	1.53072	0.831616
1.65184	1.90277	0.992394
1.43648	1.6536	0.957403
1.65403	1.84621	1.00941
1.53234	1.708	1.01422
1.24892	1.52515	0.899607
1.0879	1.27292	0.955608
1.39431	1.66623	0.936717
1.36204	1.49517	1.01911
1.54606	1.81003	0.956664
2.30505	2.40771	1.0421
1.88608	1.9967	1.05309
1.5137	1.82191	0.907214
1.38079	1.78314	0.864865
2.06564	2.4714	0.922592
1.81146	2.27697	0.882194
1.9282	2.10411	1.00122
1.36258	1.59243	0.944749
2.20468	2.27094	1.07104
1.73488	2.03166	0.951746
2.06225	2.45865	0.921159
2.22948	2.42504	1.03674
1.42211	1.75867	0.924035
1.58894	1.94563	0.920107
1.96602	2.1174	1.02992
1.65767	1.87472	0.976973
1.51331	1.88025	0.904828
2.02002	2.34122	0.962299
2.03395	2.19704	1.02171
1.20196	1.53629	0.883434
1.92703	2.2725	0.930313
2.0047	2.13966	1.03207
1.67713	1.87006	0.980261
1.58942	1.70951	1.04914
1.20401	1.5725	0.852795
1.85996	1.94315	1.04155
1.85591	2.07868	1.04768
1.5359	1.9177	0.900348
1.76448	2.17819	0.888528
1.63265	1.67857	1.08434
1.32518	1.57419	0.956625
2.13527	2.21852	1.05461
1.31988	1.60088	0.914068
1.45718	1.55525	1.02138
1.56621	1.67969	1.04531
1.70133	1.68401	1.10936
1.46891	1.71111	1.00778
1.92311	2.25416	0.944585
1.7378	2.01818	0.965907
1.59529	1.77596	0.99794
1.50157	1.6218	1.01995
1.77684	1.91266	1.05749
3.15046	2.87503	1.19961
1.63531	1.91529	1.01514
1.23339	1.50688	0.919874
1.67108	1.83285	1.04161
1.5611	1.90916	0.904941
1.37542	1.61566	0.946682
1.97397	2.38923	0.905702
1.67161	1.80072	1.05595
1.2974	1.60217	0.907995
1.25581	1.46882	0.919699
1.54188	1.75143	1.00321
1.31838	1.65091	0.904879
1.9697	2.09963	1.08133
1.60362	1.74354	1.02192
1.24425	1.63629	0.871168
1.17585	1.43882	0.918889
1.94138	2.0689	1.15406
1.28599	1.63315	0.876708
1.43094	1.62798	0.947375
1.64309	1.98146	0.976336
2.10603	2.16845	1.0738
1.29447	1.72468	0.903949
1.45691	1.94268	0.827813
1.2856	1.51884	0.942132
1.21345	1.63984	0.853497
1.61899	1.782	1.01984
1.97452	2.44185	0.891704
1.87918	2.29764	0.931728
1.16561	1.51248	0.84662
1.37834	1.69247	0.940926
2.00693	2.13537	1.05156
2.85362	3.0309	1.02858
1.37532	1.7074	0.934882
0.993324	1.42413	0.777332
2.24708	2.40503	1.00478
1.10512	1.49198	0.822714
1.85009	2.3215	0.874901
1.39541	1.62573	0.962117
2.11539	2.57655	0.914849
1.54303	1.75336	0.98908
1.42404	1.71155	0.92337
2.46645	2.42153	1.1188
1.82483	2.1621	0.914878
1.40398	1.83405	0.859214
1.10802	1.3804	0.893806
1.1382	1.61108	0.775368
1.09929	1.46557	0.834657
1.78456	2.21814	0.878313
1.65725	2.12249	0.865262
0.843538	1.1854	0.780841
1.27766	1.58879	0.917962
1.07871	1.39794	0.908015
1.42123	1.69736	0.933089
1.22434	1.45871	0.933191
2.12545	2.50092	0.948706
1.06286	1.44496	0.888221
1.15438	1.41701	0.903737
2.28771	2.54155	1.01585
1.87228	2.26517	0.902599
1.30506	1.50073	0.970729
1.69627	2.07892	0.922193
1.89565	2.3083	0.928389
1.54563	1.61059	1.04792
1.45413	1.86442	0.864064
1.6003	2.05105	0.871
1.5247	1.84472	0.947091
1.4859	1.89252	0.8912
1.45112	1.63723	0.973038
1.40533	1.62419	0.951089
2.5129	2.49513	1.10657
1.82832	1.99893	1.01816
0.940739	1.27789	0.798199
1.69166	2.19857	0.84224
1.69575	2.0711	0.933635
0.737979	1.23042	0.688384
1.65693	1.87951	0.974615
1.40144	1.67158	0.938538
2.11795	2.29971	1.05283
1.47096	2.10843	0.982222
1.40385	2.0281	0.763263
1.61526	1.96862	0.914088
2.64767	2.68784	1.10587
1.65293	2.23742	0.805076
1.29633	1.64895	0.869939
1.55503	1.99673	0.857344
1.88326	2.00815	1.04778
1.4263	2.08004	0.747088
1.91923	2.0603	1.02922
1.38679	1.78007	0.882615
1.43731	1.61663	0.988977
1.89746	2.31886	0.914495
1.44253	1.65424	0.966051
1.42758	1.81318	0.870247
1.56482	2.08689	0.826746
1.77685	2.04722	0.986782
1.35729	1.51817	1.02112
1.20172	1.42825	0.941323
1.21736	1.45334	0.962715
1.33824	1.5053	1.05504
1.74841	1.85905	1.09747
1.45886	1.74626	0.945471
1.67011	1.93273	0.951604
1.9979	2.40814	0.912955
1.55296	1.83942	1.03113
1.5036	1.811	1.02622
1.63417	1.9647	0.927147
1.77545	1.88582	1.0438
1.40799	1.65429	0.942363
0.975118	1.26681	0.878157
1.30842	1.49031	0.982533
1.9157	2.20156	0.961353
1.56697	1.75259	1.01402
1.31245	1.39954	1.04353
0.879115	1.28241	0.773469
2.01902	2.13063	1.04472
1.79368	2.07141	0.952733
1.206	1.60013	0.889991
1.86398	1.88571	1.09708
2.37471	2.73271	0.950797
2.05053	2.29241	0.983194
1.14604	1.40909	0.896971
1.53792	1.68307	1.00658
1.59812	1.9127	0.931278
1.13559	1.5177	0.838145
1.24576	1.55671	0.885538
2.12391	2.62286	0.886557
1.26899	1.71099	0.833919
1.49666	1.66325	1.00065
2.29364	2.59123	0.990872
1.67028	2.06212	0.930054
1.3563	1.70823	0.884188
1.37123	1.65835	0.91642
2.02801	2.22522	1.01852
1.72197	2.14289	0.89628
1.49162	1.80055	0.926076
1.82939	2.02806	0.998596
1.46663	1.92533	0.870546
1.70256	2.03279	0.934221
1.96337	2.18631	0.994592
1.95429	2.20834	0.998591
2.09814	2.42595	0.958623
2.00502	2.14552	1.05908
1.92318	2.25142	0.948654
1.85007	1.96328	1.08321
1.80782	2.08278	0.965755
2.02849	2.41576	0.939888
1.60892	2.08009	0.87008
1.68198	1.83586	1.04992
1.88331	2.11616	0.99625
1.47214	1.94014	0.833601
1.27504	1.53421	0.928105
1.59507	1.89773	0.933479
1.88432	2.58525	0.801683
1.46888	1.88032	0.866787
1.37411	1.66762	0.958135
1.94677	2.09814	1.0322
2.81715	3.02859	1.01312
1.77757	2.39909	0.789191
1.21088	1.45867	0.937367
1.53699	1.74903	0.968021
1.41971	1.53667	1.0071
1.31261	1.54909	0.943589
1.90353	2.22738	0.940039
1.1117	1.44092	0.886451
1.38323	1.54081	1.0152
2.44223	2.69488	0.976481
2.49206	2.61369	1.05232
2.45338	2.79949	0.967764
1.4448	1.8743	0.863127
1.46883	1.71432	1.0067
1.29084	1.64251	0.884705
2.62406	2.96708	0.969863
1.29961	1.57716	0.980897
2.02357	2.10337	1.09359
1.42908	1.57563	0.991969
1.70301	2.15531	0.880464
1.92015	2.29068	0.901486
1.16212	1.57439	0.846663
2.63368	2.87016	1.0034
1.23969	1.44111	0.947139
2.29376	2.74438	0.915037
2.07648	2.47544	0.92087
1.61503	1.71483	1.06315
1.93336	2.29208	0.930126
2.06617	2.61708	0.887411
2.0649	2.21358	1.08648
1.55465	1.63137	1.043
1.8695	2.47022	0.825873
1.49286	1.72682	0.955471
1.35602	1.68462	0.90005
1.42495	1.72821	0.94198
1.18754	1.50554	0.912593
1.16753	1.46823	0.893295
1.68316	1.93634	0.960917
1.20182	1.67149	0.802736
1.50184	1.72441	0.959143
1.34029	1.75873	0.86587
2.3267	2.69631	0.959065
1.02533	1.48274	0.795374
2.31978	2.45164	1.04966
1.39666	1.67277	1.01761
1.90613	2.23346	0.945689
1.6084	1.92821	0.931146
1.91884	1.97273	1.07083
1.73745	1.92247	1.0093
1.43499	1.69045	0.933831
1.25672	1.60721	0.861073
1.57251	1.82121	0.949527
1.41497	1.80542	0.861317
1.82318	2.15364	0.950372
1.34785	1.94845	0.761065
1.54965	1.86884	0.919311
1.77511	2.20864	0.877578
1.77199	1.99399	0.981792
1.36891	1.86144	0.810152
1.60537	1.9952	0.891795
1.00683	1.34113	0.836361
1.20293	1.59841	0.827289
1.15589	1.41839	0.908286
1.27548	1.78569	0.827426
2.23438	2.57367	0.948552
1.27229	1.71659	0.839657
1.26356	1.57669	0.913291
2.33902	2.54724	1.0265
1.57241	2.11081	0.830737
2.39008	2.40704	1.11972
1.27244	1.72613	0.829277
1.67923	2.02812	0.908111
1.98683	2.1934	1.00433
0.934344	1.30538	0.825105
1.68314	1.98808	0.955321
2.31889	2.44316	1.05365
1.77297	1.97598	0.994031
2.1333	2.31641	1.02913
2.30813	2.57702	0.992456
1.24873	1.64191	0.841575
3.2064	2.82294	1.25087
1.50978	1.74676	0.958629
1.2007	1.51717	0.885545
3.14526	2.83294	1.20147
2.20996	2.50467	0.967798
2.34991	2.44861	1.06599
1.46273	1.76158	0.926572
1.83622	1.95995	1.02531
2.19479	2.40877	1.00926
1.19457	1.40463	0.948008
2.08909	2.54124	0.887123
1.40801	1.75685	0.917629
1.47132	1.76855	0.927372
1.80673	2.1228	0.949394
1.43759	1.75896	0.912034
1.44289	1.74427	0.928571
1.86557	2.16146	0.951827
1.9748	2.2361	0.966158
2.43995	2.50828	1.08532
2.26434	2.34399	1.08077
1.52968	1.71767	1.00952
1.83805	2.02182	1.01759
1.28539	1.64245	0.86784
1.93013	2.14214	0.998329
0.925232	1.25747	0.809472
1.88714	1.96324	1.06462
1.37779	1.58614	0.965216
1.80275	1.94935	1.02511
1.67151	2.01145	0.940378
2.63766	2.67658	1.10753
1.02768	1.43137	0.810767
1.57805	1.71614	1.02694
1.36704	1.87273	0.832588
2.26394	2.43031	1.03258
1.71225	2.12122	0.891207
1.7144	1.85394	1.05149
2.45939	2.60769	1.01998
1.55266	1.84609	0.923275
1.8607	2.04849	1.0361
2.17363	2.40465	0.998056
1.73494	2.07573	0.953723
1.24919	1.5664	0.912795
1.49928	1.97016	0.848453
1.75721	1.92556	1.0056
1.25613	1.7238	0.849295
0.770478	1.14762	0.747989
0.967452	1.3602	0.795852
0.925899	1.39769	0.765215
0.842976	1.20795	0.811955
1.68926	2.1035	0.88398
1.34997	1.71237	0.887955
1.71193	1.90494	1.01627
1.756	1.91765	1.00816
1.36384	1.71372	0.892644
1.35566	1.76011	0.861205
1.27202	1.51812	0.933183
1.62585	2.00943	0.916392
1.35847	1.54132	0.970667
1.8473	1.93	1.06204
1.63433	1.85714	0.98794
1.51313	1.8443	0.917918
1.69038	2.07195	0.897178
1.52137	1.77328	0.959046
1.83348	2.14146	1.12438
1.16171	1.45802	0.926633
1.80958	2.05192	1.05576
1.19032	1.35159	0.983334
2.00342	2.10963	1.141
1.60235	1.89583	0.992657
1.78336	2.31926	0.846849
1.54202	2.00886	0.85867
1.25767	1.33312	1.0484
1.43254	1.74983	0.968484
1.23854	1.42161	0.999446
1.71177	1.9094	0.991847
1.87595	1.86094	1.12719
1.53944	1.75238	0.977692
1.46359	1.84629	0.889812
1.3344	1.60524	0.904646
1.41728	1.56644	0.981464
1.92801	2.28128	0.928971
1.16826	1.47942	0.922813
1.17526	1.56511	0.873273
2.66858	2.89403	1.01938
1.75649	1.99914	0.983914
1.28862	1.7304	0.819079
2.29755	2.65799	0.953953
1.54331	1.90101	0.925209
1.84684	2.27207	0.885454
1.10605	1.50596	0.820529
1.13729	1.4837	0.848315
1.35844	1.88213	0.812457
1.83056	1.98183	1.03204
1.29565	1.58771	0.900742
1.41362	1.8206	0.863814
1.4124	1.72298	0.922629
2.10063	2.5013	0.943929
1.06126	1.39485	0.864383
1.0076	1.4141	0.775942
1.7588	2.0065	0.991707
1.32474	1.51366	0.982765
1.17311	1.56174	0.832511
1.30762	1.68602	0.873888
2.22535	2.34107	1.04097
1.82618	2.19691	0.930849
1.08364	1.52509	0.784093
1.96697	2.18413	0.988855
1.21229	1.65826	0.841535
1.98564	2.2016	1.00216
2.00595	2.12588	1.04141
1.34814	1.66629	0.923652
2.20101	2.19893	1.09232
2.56439	2.8036	1.00538
0.785313	1.28446	0.664947
0.708557	1.21166	0.637009
1.72595	1.83892	1.09547
1.40611	1.51081	1.03133
2.86935	2.83319	1.10837
1.13055	1.47742	0.888088
1.32944	1.68681	0.925699
2.02978	2.2624	0.981761
1.52629	1.86597	0.987367
1.48381	1.78532	0.913116
1.48167	1.74095	0.951615
1.39824	1.63835	0.944151
2.08497	2.4122	0.94806
1.90035	2.40074	0.914186
2.2534	2.7669	0.970638
1.06436	1.26953	0.953872
1.18719	1.34073	0.981507
2.21068	2.29667	1.06619
2.36259	2.61287	0.979662
2.4547	2.68133	1.00377
1.92868	2.39841	0.912474
1.5822	1.70543	1.03077
1.29813	1.47087	1.03604
1.34936	1.72882	0.965447
1.1927	1.38019	0.958716
1.28574	1.66611	0.900639
1.47492	1.76661	0.991659
1.72386	1.8865	1.01405
1.70172	1.97259	0.952413
2.19082	2.45448	0.981431
1.98186	2.14517	1.08467
1.89953	1.80193	1.14289
1.85384	2.19466	0.948256
1.66769	1.97287	0.938145
1.64937	1.96765	0.938043
1.65204	1.96844	0.938736
2.94523	3.02449	1.06274
1.60004	1.74861	1.0279
1.56716	1.84732	0.958296
1.28922	1.65783	0.870012
1.33531	1.70474	0.924164
1.8375	1.83371	1.07952
1.68603	1.86974	1.08149
1.2673	1.40448	1.00489
1.53768	1.92035	0.91087
1.3208	1.63051	0.978839
1.37842	1.75689	0.882808
1.65109	1.75263	1.08991
1.41594	1.58275	1.04946
1.178	1.3832	1.00462
1.36952	1.53948	0.979766
1.34899	1.52852	1.00372
1.66612	1.74437	1.07386
1.58384	1.7513	1.05639
2.50653	2.60596	1.04532
1.00312	1.30677	0.841417
1.02161	1.67418	0.741012
1.89334	2.18558	0.974565
1.68915	1.88496	1.00828
1.65507	1.75605	1.02571
1.88189	2.03988	1.08458
1.59111	1.88445	0.942624
1.83152	2.23835	0.93287
1.64548	1.74476	1.03666
1.90966	2.2708	0.927249
1.71508	1.97834	0.968738
1.43359	1.56827	0.976203
1.31967	1.69307	0.934987
2.48991	2.68101	1.0199
1.4097	1.60628	0.96545
1.51178	1.70768	0.977981
0.812391	1.24346	0.743007
0.872769	1.22612	0.772508
1.73642	2.17181	0.868737
1.65083	1.7758	1.0563
1.68629	1.8624	1.00631
1.50423	1.92765	0.855694
1.5661	1.98647	0.85923
1.90057	1.98148	1.14183
1.24609	1.52914	0.905223
1.94234	2.48305	0.856523
2.12214	2.29309	1.03517
1.75275	1.95286	0.991313
0.829006	1.2172	0.740207
0.839618	1.14309	0.805215
2.2719	2.48796	1.00415
1.70356	1.90237	1.01112
1.53453	1.7646	1.0691
1.63176	1.5887	1.14719
1.27962	1.38972	1.03873
1.70337	1.88611	1.01603
1.60465	1.88147	0.93723
1.61915	1.75769	1.09449
1.4179	1.55232	1.03045
1.47157	1.66176	1.00229
1.97338	2.0749	1.06545
2.53806	2.32166	1.20164
1.72493	2.03158	0.952593
1.45882	1.8074	0.89928
1.48891	1.80816	0.914219
1.49705	1.63137	1.01041
1.3062	1.7931	0.881152
1.73194	1.87111	1.03177
1.76784	2.13161	0.996544
2.30948	2.6284	0.961651
1.79576	1.89239	1.05935
1.91821	2.07405	1.03544
1.25616	1.45334	0.977138
1.64149	1.88065	1.04774
1.88639	1.95307	1.06073
1.4098	1.714	0.978148
1.34824	1.65568	0.981527
1.38789	1.78715	0.953708
2.05462	2.15911	1.05444
1.37035	1.67126	0.933506
2.12366	2.28399	1.03721
2.398	2.43915	1.08359
1.5006	1.77876	0.944249
1.56949	1.86681	0.926892
0.968663	1.42975	0.760833
1.57434	1.8709	1.06409
1.41212	1.65842	0.96943
1.33622	1.59706	0.960555
1.20918	1.64291	0.86782
1.45364	1.72287	0.970231
1.55341	1.60046	1.10059
1.66371	1.80586	1.08711
2.44031	2.71235	0.995221
1.49882	1.77414	0.99469
1.72468	1.9337	0.977818
1.08577	1.42707	0.856243
1.19973	1.49402	0.903229
1.74019	1.82272	1.08757
2.20421	2.39939	1.08882
2.02954	2.14124	1.06124
2.34347	2.44426	1.05771
1.41818	1.63371	1.03694
1.32758	1.46041	0.992364
1.4884	1.64603	1.02521
1.40864	1.79789	0.961462
1.68587	1.93431	0.964818
1.83667	2.14953	0.98117
1.37409	1.63978	0.958474
1.08013	1.36938	0.921591
1.00482	1.31673	0.866476
2.23041	2.5346	1.00068
1.62613	1.90044	0.955413
1.67184	1.92068	0.961882
1.75841	2.07781	0.965944
1.95713	2.21568	0.983321
1.24451	1.44884	0.95325
1.0098	1.2591	0.908304
1.36166	1.60761	0.96471
2.12109	2.29188	1.02565
1.82585	2.01207	1.07793
1.57439	1.77594	1.05476
1.00867	1.375	0.816199
0.806615	1.25155	0.747442
2.17771	2.47992	0.947686
1.56467	1.70137	1.03468
1.93587	1.84035	1.17378
2.35251	2.51518	1.0256
1.27792	1.53299	0.965432
1.18071	1.66565	0.838522
1.52431	1.51014	1.0837
1.12177	1.31848	0.953851
1.78688	2.07972	0.972574
1.83586	1.97773	1.05581
2.47582	2.66782	1.00905
1.86507	2.32708	0.883771
1.61928	2.03373	0.904505
1.40827	1.74453	0.925216
1.65861	1.97996	1.02309
1.19587	1.49345	0.934487
1.15205	1.50677	0.872349
1.17403	1.37876	0.939003
1.33764	1.62959	0.895782
1.26669	1.56446	0.896765
1.39212	1.64417	0.949096
2.22285	2.27165	1.09739
1.90287	1.90262	1.09479
1.29865	1.62862	0.951091
1.40484	1.57796	0.992692
1.95746	2.0703	1.05849
1.99644	2.24603	0.996395
1.14029	1.53627	0.932012
0.896739	1.10729	0.889287
1.75332	1.82982	1.06407
1.50582	1.95935	0.911429
1.30748	1.52802	0.974167
1.28706	1.6051	0.920696
1.54102	1.61612	1.09404
1.34027	1.71134	0.919653
2.02181	2.03214	1.09277
2.43235	2.64621	1.04106
1.89478	2.27314	0.913418
1.45831	2.08026	0.848156
1.83249	2.05467	1.07099
1.71377	1.83261	1.04059
1.70486	2.08972	0.999522
1.4147	1.71704	0.932158
1.78119	2.05202	0.980968
1.31804	1.58031	0.924086
1.03806	1.37116	0.849002
1.59474	1.9401	0.899348
2.38213	2.57294	1.02873
2.15181	2.4484	1.02251
2.16665	2.29587	1.04263
1.86177	1.97793	1.04018
1.25146	1.69079	0.855787
1.62943	1.9724	0.915413
1.55065	1.91581	0.92086
1.38948	1.74589	0.898306
1.99067	2.10445	1.04997
1.80884	2.18125	0.958793
1.63797	1.78686	1.02616
1.56743	1.75639	0.999437
1.16504	1.3912	0.95813
2.07464	2.51179	0.909377
1.84526	2.02433	1.01952
2.12434	2.33611	1.01564
1.01679	1.424	0.792384
1.39456	1.67509	1.00444
1.43746	1.80175	0.975695
1.29737	1.59015	0.902733
2.27106	2.60893	0.956159
1.43848	1.70552	0.958987
1.80468	2.0693	0.96065
1.75074	1.88194	1.01987
1.88468	1.83734	1.16444
1.26081	1.44808	0.974666
1.16571	1.3503	0.971902
1.39547	1.61987	0.957056
2.04296	2.30225	0.982618
1.9488	2.5822	0.824995
1.30121	1.55544	0.924198
1.44683	1.82074	0.92143
1.39533	1.66856	0.954639
1.93254	2.12603	1.00499
1.31867	1.64638	0.890663
1.93995	2.26993	0.941506
1.29034	1.67654	0.861898
1.4749	1.74976	0.938894
1.11314	1.37335	0.914712
1.4209	1.79817	0.909753
1.00703	1.26942	0.877439
1.24339	1.57045	0.891787
1.65767	1.98811	0.926867
1.61277	2.14114	0.831955
2.61121	2.97058	0.975694
2.19826	2.44016	0.988962
1.53312	1.82132	0.939748
1.89251	2.14643	1.04054
1.02753	1.39131	0.829918
1.50982	1.80339	0.925388
1.16013	1.62041	0.789262
1.4397	1.72111	0.927795
1.95705	2.1678	1.06661
2.15844	2.39606	0.989353
1.73152	2.1117	0.901679
1.02067	1.34008	0.855652
2.9387	2.83397	1.13274
1.53175	1.87943	0.907729
0.812487	1.22042	0.730261
1.50184	1.80831	0.915496
1.02716	1.41015	0.798394
2.67293	2.96217	0.996631
1.45354	1.70769	0.954462
1.43356	1.93216	0.803537
2.28222	2.42601	1.05211
1.48435	1.80006	0.94082
1.39578	1.67067	0.935427
1.36613	1.71293	0.971542
0.888167	1.18964	0.819441
1.46874	1.6842	0.976378
1.48244	1.92217	0.852134
1.43074	1.95774	0.805101
1.5136	1.81236	0.94565
1.40539	1.60325	0.965226
1.18506	1.37175	0.95156
2.35286	2.796	0.939159
1.69831	1.75938	1.0642
1.33159	1.44771	1.04196
1.68823	1.6873	1.1182
1.86437	1.88627	1.06832
1.93108	2.58784	0.807182
1.40398	1.71422	0.927642
1.31104	1.77312	0.866529
1.22255	1.42555	1.00949
1.29033	1.61575	0.895523
1.0584	1.28537	0.973573
2.13517	2.33087	1.04859
2.62976	3.09681	0.922145
1.31899	1.75889	0.845961
1.313	1.70605	0.875888
1.48608	1.9096	0.878718
1.26194	1.76461	0.793052
2.40221	2.59163	1.00049
1.97763	2.2158	0.99201
1.62143	1.67401	1.11073
1.7412	2.00802	0.975525
1.43884	1.68576	0.982763
1.47661	2.00365	0.817499
1.54195	1.71618	1.01277
1.51327	1.72883	0.983856
1.87708	2.14345	0.975196
2.69403	3.01234	0.996393
2.39169	2.58674	1.05281
1.35772	1.68248	0.984597
1.63728	1.75306	1.04374
1.84546	1.95863	1.04952
1.55205	1.74693	0.988277
1.08415	1.49901	0.802874
1.14945	1.40378	0.951829
1.84887	1.97615	1.04379
2.24958	2.48241	1.00546
1.94589	2.38539	0.898399
0.906367	1.34019	0.748386
1.91396	2.18093	0.966575
1.26528	1.66286	0.852197
1.74361	2.0841	0.920674
1.46603	1.72968	0.966104
2.75942	2.96038	1.01922
1.16743	1.75365	0.802486
2.7058	2.7626	1.04719
1.60846	1.81363	0.984955
1.43986	1.67186	0.961169
1.60088	1.76537	1.02224
1.19592	1.60836	0.841421
1.54925	1.96407	0.873743
1.52047	1.87756	0.886951
2.39034	2.54192	1.04795
1.7873	2.01365	0.991774
1.15143	1.48518	0.916349
2.11647	2.64935	0.908743
1.73662	1.96546	0.987967
1.6671	2.0646	0.902053
1.49736	1.76686	0.95708
1.54056	1.74064	0.999181
1.39081	1.51108	1.01754
1.82319	2.34153	0.867488
1.27702	1.59898	0.90187
0.870684	1.21927	0.785654
2.02901	2.4664	0.905085
1.25488	1.56003	0.940588
1.79131	1.93021	1.04529
1.47591	1.76296	0.965207
1.17265	1.53586	0.877529
1.45244	1.57374	1.02373
1.61633	1.71601	1.04459
1.45629	1.59517	1.01985
1.35341	1.82002	0.83171
1.85626	2.14938	0.974755
1.88247	2.0712	1.00404
1.20814	1.69194	0.793721
1.92864	2.28129	0.92825
1.38685	1.69018	0.9102
2.42941	2.41496	1.11813
1.49831	1.80674	0.93566
1.51859	2.00624	0.865781
1.74192	2.19307	0.867714
1.24973	1.50275	0.934069
1.68404	1.94981	0.989548
0.937166	1.34933	0.769421
1.44445	1.91786	0.828002
1.3814	1.63956	0.921783
1.40946	1.66799	0.970949
2.28905	2.31488	1.111
1.98493	2.22498	0.988133
1.81717	2.06931	0.972279
1.30145	1.63691	0.990004
1.0473	1.37238	0.853393
1.29141	1.49429	0.953921
1.53115	1.75726	0.981406
1.47187	1.64771	0.976771
2.09482	2.12289	1.16577
2.34648	2.43937	1.06642
1.6078	1.98869	0.985234
2.63583	2.71128	1.09472
2.02981	2.13518	1.05969
1.38622	1.69898	0.922969
2.32539	2.38739	1.07303
1.60419	1.79561	1.01215
1.92122	2.12307	1.01104
2.1441	2.42428	1.00161
1.25335	1.53845	0.915094
2.64645	2.72912	1.06352
1.9597	2.2221	1.04892
2.11594	2.45515	0.945862
2.52839	2.9417	0.956335
2.18576	2.36298	1.02102
2.02011	2.19572	1.01669
1.12378	1.49366	0.865784
1.06548	1.34886	0.915793
0.952756	1.31538	0.859735
1.21455	1.44617	0.940521
2.05247	2.30112	0.973186
1.3352	1.58285	0.993535
2.15643	2.2657	1.04396
2.16825	2.73728	0.874991
1.75385	1.97121	0.991554
1.43196	2.14144	0.73097
1.45539	1.75638	0.95924
1.93609	2.15958	0.996684
1.79021	1.99351	1.00489
1.81843	2.12045	0.940219
2.1201	2.17098	1.07781
1.47675	1.75418	0.954138
1.23329	1.57734	0.860819
1.59984	1.8455	1.00195
0.95443	1.26079	0.831483
1.10843	1.37892	0.896068
2.08141	2.04461	1.11355
2.27582	2.51455	0.982369
2.28541	2.41898	1.05005
1.72026	2.06457	0.921778
1.78993	2.08367	0.952891
1.91446	2.12288	0.996926
1.08281	1.43529	0.842729
2.07008	2.15858	1.05787
1.94904	2.14087	1.01749
1.02877	1.41259	0.82478
2.65176	2.73204	1.09745
2.37352	2.44956	1.07
0.823928	1.12662	0.810447
1.7415	2.08724	0.918294
1.53319	1.87416	0.916453
1.83795	2.12024	0.95959
1.71986	1.96247	0.961903
2.03896	2.26216	0.996232
0.913372	1.23308	0.806316
2.37611	2.40934	1.0966
1.83334	2.16802	0.9156
0.854818	1.24561	0.753538
1.58914	1.95968	0.905628
1.91661	2.01238	1.06918
1.57185	1.85891	0.941669
1.64179	1.85364	0.974647
1.0806	1.51589	0.800745
2.3147	2.61336	0.979984
1.67917	1.99175	0.94099
1.48743	1.82353	0.912942
2.08862	2.21461	1.04665
2.02357	2.35238	0.945495
1.49896	1.7754	0.974551
1.65598	2.08171	0.899575
1.50027	1.88344	0.985208
2.0646	2.53717	0.93949
1.39962	1.68359	0.915952
1.51926	1.68947	0.998401
1.52793	1.90006	0.929613
1.76921	2.03495	0.969831
2.51707	2.66875	1.0328
1.9862	2.07133	1.06687
1.82812	2.05438	0.989733
1.66555	1.89886	0.988184
2.58622	2.76223	1.02657
1.61048	1.88347	0.940476
1.08842	1.55689	0.769545
2.05268	2.38496	0.952785
1.18039	1.65496	0.790149
1.66548	1.94691	0.943201
1.19465	1.37947	0.981588
1.61565	2.01708	0.893141
1.38874	1.69786	0.913119
1.65067	1.95694	0.930478
1.63346	2.01147	0.903218
1.21279	1.52289	0.95965
1.21637	1.44707	0.95055
1.16265	1.4912	0.920699
1.03457	1.33549	0.87658
2.55114	2.80998	0.979202
1.09291	1.46526	0.839328
1.62395	1.94944	0.915168
2.24375	2.45887	1.00125
1.59367	1.78407	0.976775
2.38095	2.42965	1.06002
1.49625	1.76066	0.954683
2.01258	2.00031	1.1243
1.9937	2.37702	0.968578
1.69441	2.08313	0.88813
2.44146	2.62463	1.03621
1.58317	1.91319	0.903676
1.13627	1.40044	0.916433
1.56129	1.57311	1.07988
1.26037	1.53014	0.898976
1.38517	1.83653	0.821566
1.13342	1.50378	0.840787
1.19278	1.59835	0.834803
2.14288	2.46668	1.00605
2.07726	2.37637	0.959836
1.59743	2.04152	0.878905
2.46529	2.74198	0.985314
2.10524	2.52833	0.918036
1.00909	1.38817	0.806482
1.78545	1.95306	1.01746
1.72853	1.96714	0.975344
1.04496	1.48226	0.775359
1.76597	2.15121	0.910066
1.4176	1.83895	0.864686
1.17823	1.56452	0.837401
1.20089	1.41839	0.940004
1.51051	1.62681	1.02695
0.928465	1.31677	0.780528
1.29634	1.63359	0.955107
2.60624	2.91161	0.985205
1.70308	1.85574	1.02847
1.92568	2.28471	0.938956
1.57934	1.83024	1.03201
1.28831	1.60227	0.899128
1.46286	1.76905	0.934756
1.38439	1.69586	0.915055
1.19459	1.56938	0.862705
1.82522	2.01729	1.00051
1.26297	1.5327	0.929529
1.41389	1.76962	0.884662
1.54865	1.77503	0.948154
1.5309	1.66004	1.01104
1.04429	1.3221	0.877921
1.58145	1.83107	0.965356
2.68086	2.84393	1.04173
1.47788	2.03466	0.81506
1.69692	1.96295	0.961682
1.00971	1.3366	0.850486
2.03835	2.02462	1.1211
1.65816	2.05227	0.922963
1.30424	1.60347	0.932266
2.13319	2.38035	0.994808
1.54236	1.83276	0.944645
1.47074	1.74816	0.94117
2.15248	2.37517	0.995298
1.68603	1.83305	1.02247
1.21717	1.47476	0.950071
1.37685	1.78319	0.874937
1.30366	1.66264	0.894625
1.38632	1.71138	0.905668
1.5909	1.94688	0.904459
1.67496	1.89543	0.992931
1.00052	1.30412	0.834064
1.36829	1.79102	0.842276
1.44927	1.90413	0.85134
2.13997	2.33568	1.02911
0.920942	1.31272	0.790638
1.40545	1.70091	0.981524
1.4767	1.92385	0.856316
2.14782	2.17402	1.09234
1.52641	1.96722	0.858205
1.60312	1.84403	0.979617
1.71457	1.9962	0.949564
1.53223	1.77649	0.958975
2.30102	2.53593	0.996319
1.60224	1.70387	1.0612
1.9854	2.06303	1.10015
1.98056	2.20592	0.990181
1.71961	1.77574	1.109
1.76325	1.95346	1.00131
1.49354	1.79166	0.927343
1.90775	2.091	1.02014
2.09954	2.22828	1.0298
1.26747	1.57751	0.909178
1.61535	1.98722	0.930755
1.24144	1.63475	0.848718
2.07785	2.53859	0.893766
2.33628	2.53614	1.00652
1.27161	1.46428	0.984944
2.00862	2.20901	1.01295
1.53381	1.7074	1.01542
1.34986	1.74128	0.891522
1.64359	1.77501	1.01843
1.92414	2.20835	0.963989
1.96545	2.28804	0.955893
2.27169	2.56396	0.975359
1.88089	2.1595	0.969211
1.78055	2.07865	0.998489
1.69289	2.18265	0.881296
2.23022	2.27175	1.08604
2.33614	2.47209	1.04528
1.92648	2.24686	0.934275
1.34708	1.55477	0.980299
2.04196	2.35161	1.04499
2.40235	2.44749	1.09159
2.5323	2.70513	1.02845
1.55578	1.86025	0.913255
1.90328	1.94948	1.07925
1.20019	1.44503	0.939789
1.47235	1.6841	0.980528
2.18174	2.31542	1.06435
1.57045	1.97624	0.95155
2.24282	2.33138	1.05598
1.61145	1.83796	0.988079
1.77532	2.13435	0.943088
2.15401	2.29552	1.06197
1.26712	1.54545	0.924768
1.90794	2.22117	0.944535
1.49217	1.89989	0.87732
2.03778	2.40087	0.944272
2.36793	2.43217	1.08179
1.56607	1.73604	1.0128
1.48226	1.74286	1.00012
1.4174	1.80718	0.871681
1.59506	1.98996	0.946228
1.27913	1.70574	0.856225
1.83526	2.07431	0.991327
1.47329	1.75911	0.920835
2.55162	3.08429	0.894051
1.6661	2.15514	0.860536
1.85411	1.96181	1.05085
1.60278	1.95238	0.927664
1.44332	1.82958	0.878669
1.1819	1.61076	0.821927
1.44034	1.81836	0.915952
1.2662	1.75058	0.821425
1.63371	1.9311	0.929196
1.06477	1.44157	0.857645
1.09102	1.32927	0.914954
1.75544	2.18649	0.913523
1.32669	1.5608	0.971458
1.22897	1.61003	0.86265
1.07252	1.47625	0.863593
1.18529	1.43356	0.916001
2.15362	2.3502	1.01949
1.78597	1.96219	1.00477
2.06272	2.48659	0.960824
1.49812	1.86857	0.90073
1.56677	1.87771	0.94818
1.47982	1.71633	0.998395
2.11263	2.30148	1.04712
2.2156	2.27473	1.10366
1.58945	1.92696	0.983998
1.25057	1.54944	0.94124
1.69975	2.03017	0.942595
2.06138	2.22256	1.02641
1.07465	1.44587	0.837479
1.14568	1.54334	0.821421
1.67681	1.74536	1.08571
2.27345	2.4709	1.01426
1.23476	1.67429	0.849198
1.46591	1.97084	0.835416
1.29431	1.57932	0.928492
1.89375	2.42687	0.868302
1.16464	1.36218	0.957332
2.08338	2.20015	1.04746
1.25004	1.55689	0.894507
1.04684	1.3374	0.874744
1.13179	1.53635	0.822416
2.34694	2.61625	0.995479
1.36897	1.70465	0.97329
1.96727	2.48379	0.877247
1.17105	1.38266	0.988031
1.3663	1.65677	0.938934
1.04601	1.38264	0.855488
1.07538	1.42619	0.866591
2.26931	2.55348	1.00407
1.06464	1.51202	0.820651
2.5639	2.4909	1.13222
2.37878	2.52358	1.04179
2.18528	2.20823	1.09652
1.44045	1.7494	0.94023
2.02868	2.27345	0.976014
2.36248	2.45897	1.12423
2.06696	2.31843	0.995034
1.39835	1.80468	0.851346
1.54591	1.87164	0.907836
2.119	2.26206	1.03103
1.64159	1.88761	0.970397
1.25818	1.52752	0.942991
2.66234	3.05288	0.951358
2.0789	2.41359	0.953097
1.67412	2.28306	0.816391
2.47252	3.04517	0.892567
1.4974	1.63007	1.01719
1.57006	1.87942	1.05473
1.18688	1.39962	0.934612
1.34132	1.55157	0.942529
1.83157	2.05029	1.03151
1.31416	1.67423	0.956511
1.50235	1.90722	0.936274
1.44911	1.82055	0.956776
1.41012	1.68256	0.942177
1.90282	2.01013	1.10344
1.84267	1.84208	1.11636
1.78999	1.72561	1.13877
1.56403	1.90248	0.912565
1.70656	2.04455	0.92558
1.28916	1.55441	0.94
1.46024	1.86487	0.965576
1.97368	2.45281	0.875115
1.11954	1.3244	0.935974
1.22849	1.55118	0.950737
1.65614	1.93157	0.960176
1.59369	1.8862	0.957247
1.33343	1.67549	0.989537
1.1289	1.41316	0.886648
1.28447	1.61921	0.879454
1.89527	1.84677	1.12391
1.80763	1.83674	1.0766
2.02147	2.15892	1.05022
2.26087	2.36317	1.07772
2.29916	2.47065	1.03383
2.21109	2.50473	0.972192
1.92344	2.16922	1.01321
2.4021	2.44842	1.08022
1.37896	1.63317	0.934752
1.46605	1.65424	0.985788
2.30404	2.78317	0.914368
1.06949	1.37784	0.900486
1.25761	1.58112	0.896435
1.87061	1.98405	1.05756
2.02861	2.21476	1.01197
1.45398	1.85094	0.865907
0.870247	1.32036	0.767863
1.78004	2.15427	0.91333
1.77328	2.29795	0.855171
2.6745	2.7653	1.07459
1.75251	1.95825	1.00409
1.34692	1.73225	0.91389
1.50189	1.64962	1.00515
2.44441	2.65493	1.02201
1.97451	2.2632	0.967764
1.19789	1.50754	0.946847
0.964516	1.23465	0.91255
1.76698	1.99032	0.992521
1.72715	1.91537	1.00785
2.61109	2.78724	1.02383
1.65011	1.82371	1.004
1.38683	1.73153	0.918881
1.72652	2.12473	0.898731
1.67003	1.95507	0.944947
1.42844	1.88745	0.855183
1.71831	1.87724	1.02501
1.84161	2.10404	1.01632
1.99665	2.27209	0.989509
1.64159	1.84551	1.00133
1.57531	1.89836	0.931769
1.97685	2.36989	0.929521
2.10256	2.43883	0.955105
2.18625	2.52979	1.03062
1.72613	1.75751	1.07974
1.66818	1.86458	1.04781
1.13956	1.32023	0.960016
1.08148	1.3394	0.915778
1.33737	1.71271	0.865303
1.34817	1.74719	0.871984
1.79838	2.04175	1.06074
1.97442	1.9774	1.11779
1.6245	1.68483	1.0626
1.6045	1.66653	1.07468
1.38689	1.59696	0.957331
1.14191	1.30827	0.948755
1.25165	1.74084	0.821919
1.57348	1.8916	0.929757
1.28583	1.53938	0.954419
1.61876	1.71918	1.03544
1.31961	1.54458	1.00591
1.43587	1.68415	0.974255
1.91917	2.32052	0.914155
1.90867	2.4357	0.876699
2.14646	2.18148	1.11403
1.92025	1.9283	1.14862
1.20019	1.70284	0.80549
1.49188	1.76505	0.928771
2.22525	2.32414	1.10528
2.23699	2.24809	1.08206
1.69059	1.94065	0.963416
1.8087	2.03309	0.99741
2.32908	2.30243	1.14471
2.40271	2.31254	1.14828
2.52221	2.82554	0.971932
2.61299	2.81958	1.04388
1.93122	2.38323	0.927887
1.18566	1.53373	0.921917
1.26	1.64315	0.912443
1.57622	1.95062	0.870973
1.82311	2.19626	0.966463
2.02614	2.11047	1.08918
1.48153	1.71217	0.978673
1.87342	1.97926	1.05237
2.52676	2.44065	1.15839
2.29428	2.43869	1.14473
2.30282	2.51061	0.999359
2.80572	2.84139	1.08116
2.33089	2.36865	1.0896
2.34779	2.60811	0.978524
2.72535	2.63943	1.14592
2.55607	2.61488	1.08657
1.64357	1.75293	1.03712
1.39742	1.77833	0.894339
1.39891	1.57195	0.968976
1.13138	1.50065	0.889256
1.02475	1.24429	0.909669
2.71297	2.79013	1.11145
1.56043	1.62181	1.06082
1.37972	1.52481	1.01658
1.02828	1.32824	0.857412
1.3888	1.55674	0.985551
1.17377	1.50398	0.936516
2.16067	2.3473	1.10046
1.30221	1.70056	0.860912
1.38811	1.50672	1.01014
1.98735	2.07924	1.08184
2.03467	2.26595	1.07442
2.07306	2.40204	0.955388
2.38679	2.53021	1.03888
2.51402	2.58084	1.07941
2.58285	2.67879	1.06548
1.46651	1.74606	0.93613
1.59531	1.93677	0.930536
1.57767	1.58266	1.12089
1.35087	1.36919	1.12716
1.50118	1.70113	0.996473
1.34456	1.60168	0.933436
1.59369	1.84159	1.02286
1.44177	1.95517	0.849234
1.52211	1.7644	0.994749
1.70105	1.78229	1.07924
1.29837	1.57819	0.936356
1.36138	1.603	0.949162
1.37016	1.58444	0.997099
1.46222	1.72079	1.0336
1.72127	1.86134	1.04161
1.3765	1.77052	1.00549
1.97935	2.18955	1.10635
1.15612	1.44103	0.936143
1.22732	1.50822	0.896088
1.13707	1.44317	0.968335
1.67878	2.00237	0.973624
1.59821	1.9425	0.957279
1.28021	1.45081	0.995132
1.55957	1.82598	1.03031
1.70311	2.02355	0.944338
1.2371	1.51376	0.931436
1.12926	1.32727	0.960045
1.78854	1.99334	1.04198
1.14487	1.38488	0.944986
1.87354	2.29166	0.903245
2.33841	2.69765	0.948838
1.42879	1.69091	0.925592
1.63823	2.08319	0.914306
1.8162	1.87121	1.09819
1.201	1.51423	0.92691
1.37005	1.7053	0.926661
1.45357	1.65256	1.05232
1.12556	1.5203	0.897733
1.73674	2.0147	0.970365
0.881354	1.33947	0.740502
1.54741	1.90219	0.946447
1.00932	1.38439	0.826288
1.03276	1.39008	0.864211
1.31041	1.58607	0.917242
1.30691	1.74618	0.849177
1.04813	1.32642	0.895923
1.61187	1.74015	1.04312
1.06345	1.44581	0.832886
1.33564	1.65299	0.922479
1.05712	1.31328	0.887763
2.54691	2.71873	1.02887
1.18697	1.48059	0.885693
1.44512	1.75167	0.921733
1.163	1.4596	0.915972
1.91695	2.09237	1.02273
1.16887	1.47944	0.921184
1.77166	1.94845	1.00785
2.29254	2.33303	1.10648
2.14589	2.33477	1.0181
1.25743	1.70582	0.829763
2.34293	2.49689	1.03419
1.59656	1.88855	0.948366
2.39024	2.52953	1.04163
1.38081	1.66462	0.933879
1.47938	1.83426	0.900406
2.20091	2.35883	1.04501
1.34375	1.56396	0.948291
1.69527	1.91513	0.989108
2.84721	3.0037	1.03722
2.14604	2.34941	1.02026
2.30879	2.37206	1.07646
2.37162	2.41124	1.09497
2.18594	2.35265	1.03562
2.44677	2.47059	1.09076
1.5892	1.77646	1.02377
1.35426	1.72598	0.927133
1.28546	1.55968	0.920153
1.44252	1.7344	0.935904
1.36499	1.67372	0.911653
2.03853	2.16787	1.04801
1.34181	1.59873	0.958259
1.34095	1.55659	0.983389
2.28911	2.40577	1.05946
1.99634	2.12627	1.05972
1.80736	1.99601	1.03007
1.23945	1.4933	0.92316
1.98677	2.14923	1.07257
1.38459	1.62352	0.942219
1.55649	1.68807	1.04259
2.00763	2.1271	1.05277
1.87341	2.1257	0.988832
0.771185	1.12567	0.762809
1.28152	1.70326	0.887389
0.934394	1.27094	0.831628
1.40307	1.86306	0.8908
1.79388	1.89058	1.0636
2.53022	2.81115	0.976426
1.68842	1.82845	1.04027
1.39183	1.61469	0.975312
3.26337	2.92522	1.21721
2.20324	2.23242	1.12496
2.58223	2.83465	0.987094
2.31644	2.53507	0.989181
1.82813	1.92639	1.06658
2.30514	2.31914	1.13192
0.969105	1.18373	0.895365
1.51674	1.74524	0.969242
2.22626	2.3484	1.06561
2.11998	2.24638	1.07035
1.5274	1.75807	0.974942
2.20745	2.34391	1.05639
2.25882	2.46048	1.06966
2.26165	2.35438	1.08022
1.8098	2.08434	0.965734
1.64627	1.8711	0.993054
1.39176	1.64354	0.958966
1.42501	1.76617	0.884873
2.03737	2.18032	1.0404
1.31035	1.5472	0.9307
1.26266	1.54083	0.958177
2.06743	2.30626	1.04428
1.6259	1.80823	1.07563
2.09044	2.12707	1.08873
1.77221	1.95748	1.01498
1.7121	2.0148	1.00321
2.34439	2.51223	1.03299
1.25624	1.5171	0.9982
1.35421	1.66801	0.944889
1.34298	1.5983	0.947763
1.76561	1.93839	1.00474
1.60404	1.75821	1.0899
1.5452	1.75511	0.992911
1.05196	1.27955	0.920217
1.83833	1.96128	1.04506
1.67006	1.8855	0.99785
1.75421	2.00303	0.984427
1.4617	1.64174	0.986292
2.37068	2.5875	1.01203
1.88552	2.06932	1.01281
1.56165	1.78788	0.996847
1.60413	1.82399	0.985788
1.62093	1.77737	1.03078
1.38772	1.67019	0.933777
1.55674	1.79124	0.978848
1.33045	1.56291	0.924177
1.22076	1.53696	0.933076
1.25833	1.71411	0.847797
1.56679	1.80498	0.969672
1.77439	1.86962	1.10062
1.54231	1.74012	0.984637
1.95505	2.20532	0.977603
1.62824	1.89718	0.959165
1.53117	1.80334	0.945362
1.42243	1.63886	0.958777
1.16993	1.52523	0.873105
1.21857	1.56234	0.871866
1.19843	1.44565	0.931392
1.96862	2.06994	1.05392
2.17069	2.34617	1.02181
1.56968	1.72087	1.0187
1.52466	1.74319	0.976269
0.992691	1.2847	0.961245
1.57564	1.7307	1.02739
1.37504	1.59596	0.970462
1.42001	1.58825	0.978617
1.95586	2.25595	0.955336
1.64458	1.79796	1.01105
1.78485	2.12164	0.939202
1.47972	1.73881	1.0084
1.44506	1.75659	0.93148
0.852486	1.18633	0.786397
1.46145	1.7238	0.946942
1.34644	1.56814	0.951134
1.55767	1.8412	0.975862
1.66708	1.93137	0.964927
2.5457	2.54477	1.10263
3.0576	2.67647	1.23799
1.45387	1.73518	0.932679
1.69152	1.95185	0.955897
1.25797	1.56492	0.889454
1.92629	1.9998	1.08688
2.38973	2.52668	1.05284
0.765891	1.1097	0.763016
2.02073	2.15398	1.04638
2.10444	2.30827	1.04222
2.24757	2.39646	1.03488
2.14832	2.4222	0.97553
1.86791	2.16013	0.971427
2.12786	2.29672	1.03139
1.32411	1.62408	0.911962
0.985437	1.33283	0.829802
1.80719	2.32699	0.857277
1.10747	1.39746	0.879562
1.35331	1.58618	0.955342
0.955092	1.22998	0.863581
1.75548	1.95616	1.0098
1.02202	1.42539	0.894753
1.11226	1.46659	0.942164
2.10362	2.24428	1.05527
1.86933	2.15105	0.958814
2.1517	2.16446	1.09804
1.4541	1.55469	1.03683
1.27437	1.4059	1.00645
0.926839	1.30118	0.857556
1.4645	1.63983	0.997902
1.67538	1.91652	0.980528
1.26503	1.53344	0.957242
1.40327	1.64251	0.985868
0.951812	1.32061	0.835433
1.6594	2.08528	0.875248
2.27281	2.53298	0.992953
1.23103	1.51767	0.945505
1.41773	1.61454	0.992795
1.76007	1.94863	1.04641
1.1665	1.60819	0.80294
1.25693	1.5692	0.880729
1.94226	2.19649	1.0104
1.89711	1.97031	1.06977
1.83346	2.0245	1.01867
1.9322	2.11625	1.03506
1.49744	1.73884	0.961801
1.19998	1.41527	0.973166
[truncated: 920 more rows]

## Sheet: delta ABC
cell area	cell length	cell width		cell area mean:	1.418		cell area std dev:	0.3628
1.53998	2.07613	0.825014		cell length mean:	1.7705		cell length std dev:	0.3699
1.82491	2.3598	0.847966		cell width mean:	0.8959		cell width std dev:	0.0706
1.39698	1.96366	0.793391
2.01991	2.48031	0.931975
2.07603	2.5056	0.901836		[h,p] = ttest2(cArea_wtABC, cArea_deltaABC, 'Vartype', 'unequal')
2.03857	2.40212	0.93104		h = 1 (rejects null hypothesis)
1.12046	1.51533	0.863903		p = 7.6614e-144
1.45218	1.89045	0.84019
1.62258	2.02039	0.900416		[h,p] = ttest2(cLng_wtABC, cLng_deltaABC, 'Vartype', 'unequal')
1.50021	1.84098	0.913413		h = 1 (rejects null hypothesis)
1.2652	1.7956	0.782041		p = 3.7607e-64
1.23777	1.78431	0.797663
1.14625	1.44828	0.874934		[h,p] = ttest2(cWidth_ABC, cWidth_deltaABC, 'Vartype', 'unequal')
1.53825	1.86939	0.897343		h = 1 (rejects null hypothesis)
1.34143	1.69347	0.935271		p = 3.0146e-283
1.56101	1.97537	0.905419
1.50654	1.77668	0.933134
1.11727	1.43056	0.87314
1.54602	1.96646	0.862598
1.77509	2.09196	0.941152
1.77281	2.12636	0.915738
1.03145	1.38661	0.806816
1.47911	1.77453	0.926912
1.14579	1.55841	0.799467
1.78662	2.11983	0.930233
1.66614	1.95291	0.951128
0.937879	1.35732	0.793787
1.54997	2.0322	0.848699
1.40635	1.89546	0.831176
1.4774	1.8701	0.88986
1.11885	1.48179	0.846675
2.07719	2.39423	0.964323
1.38951	1.71128	0.911567
1.3845	1.84189	0.858191
1.00338	1.42899	0.784204
1.47326	1.77073	0.930468
0.948634	1.30296	0.798088
1.26343	1.55422	0.90682
1.07882	1.42378	0.845667
1.50541	1.9082	0.862444
1.3261	1.64227	0.919117
1.67615	2.14189	0.872205
1.29625	1.66533	0.85613
1.37801	1.9322	0.785713
1.30884	1.60339	0.934302
1.2177	1.46113	0.966951
1.3295	1.66852	0.934732
1.07164	1.52163	0.786038
1.27688	1.69378	0.895627
1.24865	1.55475	0.871803
1.63368	2.08445	0.863151
0.989016	1.44935	0.811821
1.33545	1.68109	0.893142
1.08963	1.33872	0.957455
1.64315	1.97777	0.94769
1.32275	1.82968	0.885673
1.21729	1.77161	0.809615
1.56422	2.12438	0.78964
1.16704	1.56249	0.834527
1.81073	2.16509	0.937547
1.3943	1.91603	0.80978
1.22463	1.72714	0.813671
0.890715	1.37396	0.731837
1.07409	1.42133	0.824744
1.34982	1.81058	0.809801
1.29085	1.80788	0.794496
1.19234	1.63461	0.795963
1.28129	1.8571	0.792735
1.43677	2.12107	0.797859
1.56095	1.88196	0.910651
1.25653	1.74521	0.855593
1.28818	1.75008	0.854693
1.22588	1.67612	0.812655
1.59041	2.19227	0.794387
1.4384	1.95855	0.847408
1.6449	2.08684	0.849856
1.18592	1.61544	0.789845
1.53031	1.84375	0.947237
0.962951	1.28496	0.815746
1.45334	1.88394	0.86295
1.2233	1.77208	0.74933
1.71279	2.19974	0.926267
0.921041	1.20053	0.845787
1.58015	2.04991	0.896626
1.20394	1.6007	0.843928
1.669	1.97431	0.928368
1.26154	1.54088	0.913965
1.61532	1.87607	0.958386
1.38724	1.74824	0.880702
1.40812	1.78419	0.924007
1.28798	1.58846	0.928286
1.13201	1.51889	0.822317
1.19358	1.47973	0.947361
1.21842	1.71409	0.820627
1.19349	1.77059	0.786345
1.06436	1.63414	0.74155
1.94919	2.34427	0.904544
1.72457	2.02849	0.926144
1.72764	2.04949	0.923397
1.74081	2.02176	0.957293
1.07489	1.46117	0.818628
1.71973	2.02873	0.930995
1.11131	1.53002	0.804795
1.47087	1.81867	0.914385
0.999518	1.44365	0.76284
1.51967	1.85786	0.891025
1.19151	1.45012	0.921322
1.19986	1.53426	0.879478
0.962893	1.41854	0.766782
1.62816	1.94726	0.899524
1.73082	2.13923	0.877816
1.15304	1.58811	0.835615
1.36681	1.69916	0.918764
0.897475	1.22913	0.800457
1.15875	1.50832	0.864792
0.943222	1.30057	0.792381
1.11531	1.46272	0.846144
1.19616	1.51643	0.879148
2.17777	2.72499	0.899868
1.14204	1.51567	0.843701
1.2019	1.62169	0.886638
1.17586	1.51476	0.858334
1.09961	1.44711	0.854683
1.48248	1.88671	0.908662
1.33872	1.62541	0.911833
1.12091	1.46586	0.854588
0.971513	1.38548	0.858699
1.32949	1.71971	0.920932
0.855753	1.19165	0.794813
1.13155	1.44849	0.875795
1.21258	1.60523	0.883729
0.924207	1.32795	0.793891
0.997083	1.23944	0.873782
0.993826	1.56371	0.740796
1.78688	2.24046	0.902978
1.07474	1.33444	0.893474
1.22983	1.46116	0.934052
0.996781	1.35751	0.82676
1.48658	1.91226	0.831708
1.18141	1.46476	0.86691
2.20182	2.59153	0.921344
1.41513	1.8869	0.817311
1.38305	1.60244	0.941622
2.13018	2.60838	0.890475
0.791727	1.19752	0.824523
1.90523	2.41929	0.866818
1.85033	2.42191	0.838797
1.03578	1.40499	0.834679
0.881412	1.15358	0.821874
1.25776	1.56734	0.890927
1.62662	1.95902	0.912087
1.42117	1.71843	0.966763
0.886038	1.20661	0.804725
0.929503	1.33081	0.794743
1.50153	1.77705	0.940327
1.01694	1.34582	0.833618
0.994637	1.37856	0.817742
1.06519	1.40619	0.837331
1.27979	1.55413	0.961313
1.32337	1.82638	0.813137
1.41437	1.68944	0.945247
1.43815	2.02982	0.787141
1.29122	1.51563	0.922088
1.11581	1.56699	0.821613
1.20644	1.53108	0.889538
1.45117	1.79045	0.924896
1.26877	1.58211	0.881917
1.22843	1.54161	0.896898
1.40797	1.91819	0.876495
1.31328	1.57017	0.916893
1.25082	1.6906	0.835523
1.38602	1.7814	0.865805
1.31144	1.53722	0.938677
1.2631	1.76268	0.830009
1.09997	1.45054	0.8566
1.7301	2.23928	0.905818
0.92781	1.29789	0.78853
1.32382	1.55341	0.949601
1.1175	1.34642	0.926195
1.78716	2.06945	0.962477
1.15156	1.60483	0.83265
1.96129	2.55821	0.822754
1.50408	1.79432	0.930393
1.60783	1.96497	0.906624
1.08863	1.43893	0.868805
1.15002	1.5277	0.84082
1.53054	1.93233	0.874169
1.27131	1.69613	0.841708
1.56951	1.9805	0.948205
1.17333	1.48577	0.912285
1.35247	1.77367	0.894617
2.06962	2.52454	0.885892
1.03405	1.42735	0.792737
1.11371	1.55669	0.809503
1.71638	2.11542	0.923218
1.78982	2.00949	0.989915
1.23564	1.67914	0.824044
2.22981	2.63062	0.926504
1.84998	2.18719	0.957436
0.920935	1.19721	0.838735
1.67759	2.25495	0.814186
1.17785	1.64848	0.800615
1.07714	1.40811	0.89064
1.5598	1.84723	0.938123
1.285	1.78019	0.811498
2.01327	2.43172	0.938662
0.824543	1.22168	0.760288
1.14138	1.48207	0.88585
1.30366	1.92377	0.778583
1.89964	2.26286	0.936904
1.16049	1.601	0.850646
1.02391	1.34585	0.859537
1.34583	1.7209	0.921696
1.06129	1.43544	0.855812
1.12996	1.43388	0.877534
1.29625	1.63413	0.884894
0.977962	1.36166	0.809799
1.45768	1.74226	0.949964
1.26707	1.59151	0.876818
1.28849	1.60401	0.904195
1.43324	1.87887	0.880751
1.27242	1.60372	0.900658
1.32262	1.76512	0.845546
1.3238	1.71237	0.914072
1.51803	1.76937	0.940321
1.31878	1.60572	0.893035
1.1753	1.51465	0.868838
1.28494	1.57852	0.917936
2.07752	2.61861	0.868061
1.37582	1.76931	0.901687
1.57968	1.84826	0.962859
1.06532	1.45998	0.824961
1.18235	1.50615	0.889814
1.35849	1.66757	0.902441
1.13025	1.38094	0.928578
1.16307	1.52	0.84586
1.08448	1.30395	0.900101
1.13534	1.36253	0.941651
1.41379	1.6807	0.956611
1.13915	1.39913	0.911665
1.2696	1.42668	1.00733
1.32584	1.37758	1.0424
1.44329	1.68856	0.976851
1.30012	1.4012	1.04017
1.86995	2.17753	0.982873
1.02009	1.39128	0.82691
1.32637	1.78415	0.921169
1.44568	1.81709	0.885171
1.74077	2.02239	0.964512
1.09046	1.60096	0.810154
1.08512	1.38009	0.876706
1.01609	1.30136	0.853464
1.27724	1.6238	0.856317
1.24035	1.49352	0.99157
1.00922	1.36853	0.83051
1.52091	1.5871	1.05244
1.27704	1.54387	0.947448
1.71852	1.92126	1.00468
1.72635	1.88218	1.03262
1.82488	1.89092	1.05011
1.29443	1.77626	0.84851
1.22367	1.6035	0.840542
1.16987	1.52118	0.891774
1.20517	1.59001	0.871113
1.09168	1.35375	0.904322
1.02291	1.2744	0.893037
1.08496	1.44023	0.87926
1.33937	1.81344	0.815733
1.36535	1.65572	0.949025
1.27491	1.88003	0.765281
1.18288	1.47893	0.920154
1.37123	1.81243	0.84606
1.24028	1.74453	0.810333
1.5046	1.82065	0.910437
1.46132	1.77465	0.914335
1.19475	1.38023	0.971677
1.35395	1.60963	0.913104
1.07343	1.60417	0.750014
1.59862	1.88497	0.942884
1.14091	1.50438	0.827717
0.978431	1.36246	0.807469
1.80403	2.22839	0.896312
1.27113	1.62397	0.873673
1.25912	1.63163	0.832743
1.78656	2.17028	0.941748
1.07317	1.45163	0.81855
1.48587	1.64499	0.989264
1.41465	1.61549	0.930962
1.43021	1.81634	0.910655
1.31877	1.67444	0.896761
1.02972	1.42405	0.806977
1.45632	1.70095	0.944014
1.69151	2.13762	0.859144
1.37317	1.82669	0.84173
1.06368	1.36449	0.870361
1.05141	1.43797	0.821302
2.41755	2.83658	0.938123
1.15077	1.59276	0.921742
1.05751	1.645	0.73068
1.27607	1.67799	0.872992
1.24523	1.59607	0.88564
1.26269	1.57104	0.931674
1.27713	1.72365	0.818812
1.4468	1.93306	0.853609
1.4287	1.7782	0.897279
1.29322	1.7454	0.81671
1.56021	1.82472	0.96177
1.80847	2.17446	0.919194
1.68971	2.10691	0.886828
2.05409	2.51865	0.902963
1.6729	2.11653	0.926522
1.15338	1.57522	0.853889
1.56908	1.80706	0.962627
2.02676	2.49524	0.900884
2.00452	2.36219	0.97518
1.47257	2.02194	0.810663
1.42265	1.90311	0.838269
1.19073	1.59625	0.857019
0.98741	1.44419	0.806786
1.13132	1.49922	0.822114
1.31004	1.60935	0.907532
1.98675	2.52653	0.848522
1.8039	2.29895	0.87181
1.10562	1.43722	0.858312
2.29521	2.74411	0.918549
0.935219	1.35686	0.747973
0.96461	1.26019	0.849039
1.18261	1.44514	0.917443
1.18747	1.60088	0.857032
1.25389	1.725	0.868776
1.22483	1.60119	0.844477
1.87365	2.39021	0.905606
1.10681	1.2235	0.966508
2.03299	2.38561	0.969286
1.79902	1.92787	1.02118
2.09521	2.54548	0.8884
1.33848	1.73567	0.858455
1.48041	1.97313	0.839195
1.08698	1.37221	0.908839
2.23795	2.81725	0.909711
1.96431	2.34154	0.933371
1.16964	1.56943	0.833785
1.37805	1.5043	0.991006
1.37134	1.8107	0.841199
1.66794	2.18648	0.892717
1.87609	2.27801	0.908015
1.69003	2.03761	0.937262
1.58075	2.02834	0.882114
2.02759	2.51585	0.893293
0.867996	1.22602	0.796886
0.983666	1.19257	0.898498
1.73172	2.28104	0.871336
1.8637	2.44384	0.896156
1.85722	2.3315	0.889856
1.77225	2.2565	0.855469
1.61752	1.915	0.925017
1.40609	1.94381	0.814309
1.27176	1.8218	0.858518
1.43292	1.84886	0.911744
1.38638	1.70465	0.95409
1.90994	2.44325	0.850415
1.72462	2.08056	0.889972
1.6695	2.0992	0.886279
1.3347	1.83068	0.83887
1.14073	1.56553	0.808333
1.10414	1.46319	0.842161
1.11332	1.51855	0.80646
1.35299	1.65623	0.905075
1.36101	1.71273	0.891652
1.20779	1.51996	0.877325
2.66787	2.84349	1.02311
1.68722	2.14052	0.903464
1.47052	1.80996	0.886883
1.41256	1.83895	0.888529
1.50985	1.77284	0.954717
1.61094	2.02392	0.887716
1.15506	1.55915	0.954164
0.994661	1.1216	0.966284
2.32574	2.73352	0.951565
1.6663	2.06106	0.932343
1.0198	1.43469	0.804859
0.8102	1.24565	0.735189
1.08937	1.40585	0.854498
0.906944	1.32166	0.768353
1.13446	1.50144	0.839399
1.30073	1.8471	0.801746
1.71204	2.14761	0.891802
0.856744	1.17733	0.814615
1.17913	1.53777	0.859835
1.35365	1.67035	0.897825
1.68897	2.16282	0.830531
1.16899	1.54675	0.870637
1.50896	1.82083	0.935232
1.17094	1.60271	0.820751
0.999858	1.43289	0.796078
1.42385	1.81262	0.893603
1.27496	1.64432	0.8493
1.69926	2.35815	0.817923
1.43083	1.76736	0.908108
1.53258	2.1058	0.819626
1.46906	1.92943	0.891736
1.43598	1.68241	0.959126
0.986965	1.30755	0.835568
0.969994	1.37743	0.811676
1.91776	2.28306	0.919481
1.14029	1.62244	0.798605
1.19882	1.48917	0.908198
1.53526	2.17124	0.75605
1.21572	1.60821	0.834474
1.33881	1.79081	0.904231
1.08783	1.63559	0.758453
1.16593	1.71217	0.841936
1.64431	1.9801	0.924253
1.85833	2.29518	0.939117
1.08309	1.38634	0.860004
1.01371	1.41761	0.826995
1.39545	1.76631	0.88072
1.38266	1.8202	0.837906
0.942801	1.2646	0.830115
0.806682	1.18879	0.764569
1.71649	2.22283	0.843546
1.95795	2.34641	0.890906
1.93696	2.33763	0.912973
1.78407	1.95458	1.01867
1.12831	1.53146	0.814521
1.2817	1.58208	0.919327
1.29392	1.64237	0.915464
1.54377	1.61344	1.01679
1.82503	2.03563	1.02378
2.06142	2.26334	1.01296
1.00899	1.38553	0.860296
1.19354	1.53057	0.869644
1.59681	1.88106	0.969817
1.69722	1.85242	1.04825
1.63409	1.81361	1.02764
1.54798	1.71413	1.04515
1.79848	2.05491	0.987208
1.79917	1.94315	1.0741
1.86519	1.90065	1.07195
1.53685	1.94479	0.863964
1.53816	1.95991	0.863356
1.02956	1.4353	0.82435
1.71363	2.09921	0.893032
1.80675	2.2014	0.908831
1.46667	1.79049	0.933728
1.67873	1.98608	0.963393
1.40859	1.69359	0.921572
1.68226	2.11728	0.92408
1.80709	2.1889	0.907505
1.28761	1.5951	0.908749
1.67791	1.87135	0.997661
1.87577	2.25406	0.946878
1.29747	1.74416	0.833978
1.39644	1.8188	0.895753
1.46116	1.90094	0.898608
1.03548	1.37881	0.850508
0.878554	1.22288	0.867784
1.95556	2.53208	0.861866
1.14545	1.45515	0.887047
1.12369	1.39768	0.898309
1.11255	1.53526	0.850147
0.786359	1.07904	0.820342
0.982281	1.51095	0.732092
1.13103	1.45564	0.874769
1.45729	1.67599	0.975617
1.57837	1.69302	1.01743
2.0569	2.54699	0.87562
1.49383	1.84276	0.877714
2.11303	2.56912	0.908139
1.1025	1.53493	0.8077
1.07938	1.3975	0.872722
1.14535	1.48402	0.951019
1.87792	2.23902	0.929794
1.09448	1.3996	0.922386
1.26134	1.67854	0.862401
1.92564	2.54986	0.827101
1.98864	2.38126	0.944673
2.0699	2.64333	0.892923
1.76163	2.22725	0.882521
1.20213	1.62361	0.821325
1.25588	1.6048	0.860048
1.25851	1.71938	0.865679
1.15629	1.25539	0.992838
1.87936	2.18061	0.955937
1.27715	1.60403	0.922604
1.28702	1.77946	0.823824
1.20333	1.63533	0.805925
1.21215	1.58309	0.879577
0.852078	1.2586	0.74782
1.14087	1.49849	0.838542
1.19455	1.64165	0.823113
1.18423	1.54025	0.852648
1.55365	2.07599	0.826867
1.79848	2.32271	0.895284
1.18495	1.78402	0.732288
1.49557	2.19202	0.782815
1.67996	1.82103	1.07509
1.52651	1.80078	0.987185
1.59395	2.06528	0.916738
1.37358	1.74926	0.902019
2.20951	2.68304	0.909633
2.08698	2.53616	0.923227
1.04331	1.31811	0.895241
1.01905	1.40962	0.829141
1.37276	1.76982	0.872641
1.48583	1.82391	0.940368
1.61829	1.94884	0.911942
1.76979	2.02946	0.966103
1.70894	1.88128	1.01212
1.5029	1.82299	0.934086
1.64169	1.87276	0.95921
2.01093	2.17621	1.01267
2.02067	2.15403	1.03084
1.28985	1.58125	0.915922
1.71473	2.05852	0.926601
1.8246	2.26321	0.894111
1.4378	2.02001	0.815876
1.71737	2.08358	0.976201
1.47739	1.80197	0.9877
1.38526	1.74188	0.881486
1.9347	2.25088	0.995176
1.81647	2.12311	0.974845
1.63383	2.22772	0.815039
1.53862	1.91914	0.894981
1.81708	2.11188	0.993623
1.99252	2.50025	0.883851
1.54695	2.11099	0.892228
2.00781	2.31297	0.961902
1.65335	2.04464	0.960314
1.39702	1.74582	0.894369
1.95295	2.33483	0.958058
2.09832	2.46052	0.945465
2.20908	2.35596	1.0484
1.67636	1.78949	1.04223
2.12852	2.54029	0.928274
1.75815	2.05953	0.962317
1.48003	1.87878	0.878374
1.5807	1.80171	0.971346
1.93938	2.26327	0.936935
2.32084	2.47581	1.07585
1.59968	1.98299	0.944533
2.13894	2.58511	0.924258
1.40215	1.70851	0.945381
1.95464	2.37574	0.940738
2.15695	2.25516	1.05845
1.32737	1.45735	1.02194
1.838	2.23274	0.942207
1.45998	1.79185	0.941404
1.90102	2.32092	0.934474
1.27466	1.64819	0.860056
1.24201	1.65703	0.839149
1.67267	2.06119	0.919206
1.43658	1.82288	0.88642
1.3382	1.63529	0.904112
1.51789	1.85846	0.937798
2.07369	2.54283	0.903033
1.91483	2.15576	0.996228
1.3605	1.74266	0.870432
1.70241	1.93193	0.976066
1.82537	2.16256	0.943909
1.23165	1.60997	0.862548
1.65227	2.03842	0.941894
1.67077	1.96718	0.941852
1.4224	1.87891	0.859507
1.90042	2.04186	1.03627
1.73888	2.08088	0.940563
1.45139	1.81862	0.886608
2.06436	2.41905	0.959626
1.51283	1.87136	0.955313
1.38206	1.56253	0.951328
1.85356	2.23163	0.954413
1.79701	2.1401	0.941132
1.9028	2.17954	0.959446
1.00161	1.33627	0.874514
1.94062	2.28159	0.949171
2.06512	2.36724	0.965281
1.03491	1.29275	0.882867
1.97778	2.50337	0.899815
1.49156	1.64926	1.01391
1.83688	2.21559	0.933907
1.6954	2.14363	0.921627
2.00709	2.27532	0.979011
1.68821	2.10039	0.948227
1.76818	2.10104	0.976572
1.69453	2.00236	0.952808
1.4957	1.78338	0.959145
1.53482	1.86427	0.94102
1.25694	1.50955	0.930683
1.24604	1.66209	0.879305
2.0242	2.4467	0.916069
1.47563	1.7252	0.972966
1.66754	1.93851	0.95248
1.47741	1.77014	0.938431
1.61849	1.84635	0.994617
2.01076	2.3605	0.966761
2.05503	2.41878	0.966402
1.72514	2.00276	0.970678
1.92719	2.23343	0.948114
1.4737	1.83873	0.904173
0.927188	1.20664	0.859182
1.19096	1.61072	0.855795
1.89764	2.3173	0.952405
2.3402	2.675	1.00099
1.88095	2.23561	0.935512
2.17359	2.67064	0.908114
1.83782	2.30243	0.9298
1.59991	1.96925	0.9247
1.65208	1.95712	0.948867
2.25783	2.81985	0.896287
2.09739	2.6158	0.916595
1.98379	2.23536	1.02279
1.94721	2.42237	0.859906
1.84094	2.03603	1.03253
2.3156	2.59365	1.00592
2.24271	2.66438	0.926926
1.88794	2.11388	1.01822
2.02757	2.56237	0.897441
1.8683	2.18462	0.944688
1.11825	1.35192	0.933411
0.944367	1.25176	0.841953
1.82174	2.14598	0.946035
1.66142	1.96242	0.944032
1.71314	2.01523	0.962042
1.66565	2.11604	0.903551
0.980701	1.10824	0.955824
1.7085	2.05959	0.935387
1.25563	1.63716	0.869966
2.06648	2.39847	0.942674
1.45979	1.74906	0.933049
1.37625	1.76837	0.870844
1.18435	1.54584	0.898046
1.41645	1.73324	0.944396
2.21868	2.33062	1.05088
1.74155	2.0348	0.981888
1.70234	2.00875	0.947868
1.0784	1.27611	0.924764
1.3502	1.52342	0.994889
1.77403	2.15943	0.919463
1.55929	1.74274	1.02493
2.02476	2.26109	0.981755
1.69634	1.9564	0.988216
1.1057	1.43156	0.908402
1.94442	2.30845	0.928516
2.04459	2.1573	1.04431
1.63236	1.97386	0.916151
1.38471	1.63653	0.953884
2.00554	2.44004	0.932899
1.7456	2.0004	1.00016
1.09556	1.44724	0.90369
1.83772	1.91633	1.06742
1.95076	2.35137	0.962168
1.54322	1.99458	0.902804
1.66191	1.96743	0.944843
1.28819	1.74361	0.853185
1.14704	1.52862	0.875246
1.58936	1.90201	0.970812
1.8622	2.21143	0.95475
1.81916	1.99518	1.00408
2.10302	2.67342	0.909653
1.14437	1.52642	0.845408
1.6169	1.98683	0.91298
1.67117	2.04127	0.956371
1.37774	1.73345	0.914614
1.81208	2.04199	0.994066
1.74617	2.05197	0.953608
1.79352	2.03863	1.02589
2.3641	2.52971	1.04237
1.04933	1.39126	0.83479
1.51591	1.86895	0.959915
1.63779	1.94212	0.938903
1.26437	1.56327	0.882267
1.3329	1.60288	0.923376
1.59434	1.97365	0.912184
1.44125	1.76323	0.925451
1.58142	1.76304	1.00122
1.57776	1.88576	0.935542
1.48113	1.81722	0.914881
1.53177	1.85403	0.955646
1.50443	1.78472	0.933005
1.48749	1.82662	1.01774
1.73693	2.25363	0.881863
1.59342	1.83374	0.981141
1.38964	1.65859	0.932086
2.38293	2.69479	1.02141
1.65115	2.00657	0.930471
1.6246	1.94871	0.928769
1.05875	1.30468	0.891099
1.48357	1.78551	0.937695
1.69275	2.06667	0.911646
1.68225	1.90854	1.02025
0.881429	1.24744	0.784182
1.95804	2.4276	0.938909
1.95341	2.1011	1.06375
1.16245	1.65964	0.855629
1.76131	2.06202	0.954223
1.00489	1.44445	0.817192
1.48013	1.74127	0.954239
1.547	1.84343	1.03087
1.2573	1.55112	0.886187
1.44969	2.03938	0.812315
1.19953	1.39469	0.946193
2.31456	2.57652	1.03916
1.48393	1.68662	0.984746
1.25956	1.72963	0.884435
1.39248	1.54334	1.02561
1.74682	1.90412	1.03463
1.33393	1.61331	0.948643
1.22721	1.46132	0.92956
1.86377	2.07937	1.01204
1.40307	1.71325	0.925386
1.49169	1.80768	0.97672
1.16928	1.45561	0.894165
1.41819	1.70544	0.961922
1.10491	1.44138	0.85608
1.23121	1.45941	0.924404
1.43055	1.79095	0.924669
1.0363	1.3699	0.849639
1.22904	1.64277	0.851958
0.832327	1.14491	0.846309
1.37977	1.69208	0.9254
2.05469	2.37551	1.01297
1.58223	1.94879	0.933405
1.06999	1.44635	0.822639
1.55846	1.93475	0.94423
1.09165	1.35852	0.900064
1.13936	1.51688	0.827337
1.01741	1.46933	0.765776
1.59034	1.91728	1.02902
1.20646	1.71579	0.792458
1.96883	2.29923	0.954697
1.19895	1.52265	0.878154
1.54874	2.09661	0.790698
0.883614	1.3258	0.747285
0.9878	1.30249	0.829431
1.65064	2.11949	0.854652
0.886332	1.23314	0.793175
0.985036	1.41049	0.796241
1.02125	1.39667	0.825484
1.27443	1.79042	0.841719
1.67895	1.81897	1.02392
1.84107	2.15732	0.936737
1.51153	1.97481	0.913331
2.35593	2.7819	0.918404
1.45084	1.70678	0.967646
1.03771	1.43673	0.810126
1.58278	1.97773	0.888104
1.6459	1.98716	0.947281
0.937722	1.29319	0.794307
1.60293	1.99749	0.891891
1.16723	1.51243	0.851064
1.28221	1.6408	0.898303
1.48951	1.84103	0.933799
2.14444	2.31822	1.04698
1.52035	1.78837	0.960056
1.77318	2.00113	1.03855
1.39605	1.83557	0.85658
1.29154	1.47235	0.965901
1.93621	2.14751	0.998338
1.21042	1.58084	0.879291
1.30068	1.76006	0.819093
1.73085	2.06318	0.943558
1.21982	1.61692	0.854006
1.39554	1.69449	0.907378
1.17237	1.56758	0.858442
1.75869	2.23466	0.868149
1.05395	1.45217	0.827724
1.0823	1.576	0.779226
1.39536	1.93008	0.866698
1.44538	1.81807	0.894312
1.15362	1.55112	0.828678
1.17201	1.46045	0.922707
1.23871	1.6354	0.886986
1.83434	2.24169	0.940372
1.11428	1.50707	0.82585
1.19374	1.50405	0.864673
1.31755	1.70562	0.895341
1.68307	1.95419	1.0866
1.63348	1.90709	0.936528
1.33469	1.75277	0.854699
0.971963	1.34167	0.809126
1.31849	1.75433	0.901682
1.62399	2.16283	0.860754
1.23645	1.60865	0.851434
1.73434	2.20217	0.8729
1.68198	2.16827	0.862304
1.36483	1.75019	0.879228
2.22356	2.40252	1.01789
1.25175	1.61331	0.948722
1.85715	2.29766	0.888781
1.3509	1.44186	1.01014
1.54403	1.85608	1.01507
1.72291	2.13787	0.893057
1.44931	1.68752	0.999816
1.65456	2.05287	0.926745
1.5636	1.79038	1.02056
1.7742	2.17414	0.903884
1.26562	1.74668	0.880337
1.2604	1.54547	0.907193
2.20425	2.50398	0.956851
2.20737	2.68351	0.921488
1.24892	1.58266	0.878422
1.31931	1.68966	0.901045
1.19736	1.53844	0.85766
1.34586	1.75182	0.934226
1.22458	1.63311	0.855385
1.17932	1.51143	0.869801
1.33716	1.58688	1.01199
2.00435	2.3637	0.949932
1.60946	1.7737	1.01343
1.18817	1.46026	0.896254
2.12338	2.30297	1.02953
1.51817	1.8441	0.93494
1.41453	1.942	0.831683
1.36272	1.76679	0.943365
1.42956	1.75681	0.906631
1.43485	1.76551	0.900454
2.11341	2.41288	0.9714
1.30695	1.63281	0.877656
1.21534	1.62957	0.835431
1.05987	1.43845	0.825682
1.04604	1.54942	0.770245
1.89119	2.36067	0.898099
1.75932	2.19613	0.887885
1.58898	2.16116	0.851013
1.62379	1.90081	0.947972
1.90815	2.2848	0.9382
1.95193	2.2917	0.945529
2.40376	2.5166	1.07831
2.4219	2.52837	1.04798
1.77416	2.03225	0.975672
1.62255	1.98128	0.918708
1.41193	1.71682	0.948317
1.62577	2.01542	0.907414
1.99817	2.44611	0.90341
1.49141	1.89458	0.936669
1.75835	1.83995	1.03515
1.80868	2.15464	0.952771
2.12365	2.78511	0.849763
2.25771	2.72715	0.906
1.99518	2.35179	0.940837
1.94739	2.33403	0.925498
2.07493	2.33803	0.988775
1.14452	1.3592	0.943396
1.33794	1.58995	0.957737
1.41743	1.70297	0.946299
1.1819	1.56994	0.883827
1.83371	2.21356	0.946389
2.29145	2.6409	0.954289
1.04226	1.35538	0.861634
2.07135	2.4145	0.94968
1.87921	2.25623	0.904484
1.50316	1.74912	0.984275
2.53833	2.80773	1.02687
1.60346	1.76535	1.02258
1.66038	1.88725	0.98143
1.96006	2.35697	0.925509
1.62205	1.77007	1.02949
1.60153	1.87498	1.0015
1.00339	1.16694	0.943437
0.873901	1.23019	0.794734
1.93547	2.42863	0.916256
2.25507	2.79868	0.927571
1.95083	2.25131	0.951554
1.93399	2.27164	0.936339
1.81518	2.30976	0.873224
1.81949	2.26658	0.930491
1.6377	1.97814	0.924575
2.07843	2.46585	0.938815
1.95901	2.52539	0.847761
1.70391	1.99852	0.927372
1.13707	1.4098	0.928676
2.01151	2.40876	0.929684
2.18541	2.6665	0.907434
1.86604	2.12331	1.01101
1.80234	2.05227	1.00052
1.03026	1.30351	0.870801
0.937524	1.22289	0.889203
1.05561	1.39447	0.853353
1.81991	2.11562	0.971575
1.12602	1.44078	0.898062
1.52751	1.83232	0.929948
1.80112	2.08364	0.989045
1.1552	1.28082	0.999559
1.3838	1.62732	0.951954
1.17889	1.40852	0.961346
1.17961	1.4943	0.913719
1.54779	1.97115	0.871516
1.85509	2.3085	0.904022
2.09299	2.50228	0.925306
1.20343	1.48024	0.916038
1.28896	1.51538	0.96151
1.18414	1.37442	0.945321
1.15532	1.38693	0.955452
1.30028	1.36361	1.06829
1.66613	1.93094	0.95806
1.37725	1.69324	0.909074
1.26741	1.5232	0.932708
2.24095	2.63766	0.923293
2.73845	2.84254	1.06068
1.6627	1.97813	0.972632
1.51341	1.81847	0.917059
1.54949	1.77911	0.971409
1.5847	1.96208	0.926178
1.11479	1.50981	0.81562
1.93454	2.44425	0.877887
1.64285	1.93976	0.93374
1.64191	1.99653	0.915868
2.59706	2.6826	1.08108
1.49265	2.11514	0.800964
1.46419	1.87989	0.847654
1.11456	1.42801	0.870196
0.746516	1.09988	0.745602
0.968986	1.17175	0.920704
1.51051	1.82255	0.941689
1.54155	1.89512	0.911724
1.53442	1.86039	0.920009
1.40963	1.81076	0.894889
0.871048	1.24579	0.829903
0.915804	1.26275	0.851218
1.67676	1.97632	0.955233
1.73082	2.07202	0.93285
1.00267	1.3235	0.841078
1.11357	1.4093	0.919576
1.11297	1.45455	0.915948
1.12435	1.41298	0.926671
0.822929	1.07739	0.846199
0.933505	1.25839	0.841135
1.80741	2.03599	1.06522
1.9726	2.20457	1.02453
1.81675	2.26462	0.886592
1.48637	1.69277	0.982787
1.45711	1.83823	0.924223
1.08761	1.4918	0.846507
2.47889	2.72814	0.990709
1.22233	1.55698	0.880213
1.10751	1.40507	0.906473
2.11098	2.53043	0.941071
2.2373	2.56967	0.954316
2.35252	2.53508	1.04536
1.56572	2.03307	0.869891
1.76325	2.19283	0.886534
1.7077	2.13389	0.893119
1.60192	1.95701	0.962126
2.00988	2.13407	1.05316
1.4931	1.95964	0.849784
1.31503	1.49312	0.997015
1.25981	1.65578	0.889525
2.2668	2.59786	0.96889
1.23978	1.57241	0.898649
1.33283	1.52466	0.979782
1.25471	1.54163	0.904142
1.26665	1.58516	0.968447
1.15278	1.44744	0.876356
0.981239	1.37822	0.814307
1.04321	1.41022	0.854754
1.14151	1.48799	0.860314
1.73118	2.17117	0.882024
1.67439	2.00285	0.940627
1.77279	2.14838	0.942432
1.89582	2.31821	0.916405
1.59845	2.0074	0.926588
1.45304	1.77505	0.96063
1.58598	1.7122	1.06005
1.54729	1.96822	0.99135
1.69944	2.1183	0.876566
2.06631	2.35924	0.994578
1.34687	1.56571	0.979079
1.31568	1.72285	0.893363
1.80309	2.19187	0.935854
1.75348	2.14888	0.922615
2.15828	2.44855	0.970229
1.99876	2.46721	0.887149
2.31533	2.43315	1.01258
2.08012	2.20427	1.03779
1.55191	1.95085	0.882743
2.12889	2.62668	0.925258
1.35878	1.69378	0.906301
1.38226	1.77169	0.890488
1.47916	1.94672	0.843927
1.64507	2.1499	0.855013
1.97399	2.40958	0.89273
1.26746	1.52462	0.981343
1.18389	1.54035	0.899667
1.652	1.98664	0.94909
1.60604	1.86456	0.995205
1.17622	1.66038	0.834022
1.07023	1.38226	0.882897
1.27526	1.49397	0.928308
1.08572	1.40669	0.854277
1.11741	1.38274	0.898484
1.11385	1.46336	0.916135
1.34578	1.53931	0.999697
1.37211	1.59143	0.969542
1.2873	1.6042	0.947229
1.29333	1.45451	0.984252
1.06305	1.30145	0.891078
1.13713	1.37252	0.938702
1.28913	1.7087	0.884336
0.976611	1.2934	0.840502
1.34968	1.75453	0.895573
1.00593	1.33979	0.836715
1.23091	1.5683	0.905395
1.14057	1.39609	0.926807
1.0852	1.43675	0.860984
1.14289	1.53136	0.857186
0.974115	1.30057	0.836126
1.15031	1.49458	0.861349
1.71213	2.11376	0.899976
1.61077	2.11372	0.86873
1.31506	1.56349	0.925533
1.10199	1.47191	0.873447
1.29643	1.68186	0.864329
1.14131	1.49569	0.855654
1.81651	2.25176	0.890587
1.69323	2.02647	0.94107
1.9189	2.29003	0.908189
1.45697	1.7704	0.920602
2.21973	2.57641	0.950946
1.90102	2.29581	0.923255
1.23441	1.69078	0.848344
1.37231	1.73623	0.879471
1.06627	1.60351	0.781595
1.23328	1.82007	0.780412
1.57308	1.73604	1.0102
0.996281	1.32359	0.835215
1.07915	1.42943	1.00935
1.34955	1.75211	0.856415
0.989239	1.41555	0.808503
0.687255	1.00786	0.747834
1.56479	1.97186	0.902495
1.13747	1.56637	0.891301
0.861703	1.1903	0.821933
2.71732	2.84826	1.04997
1.13004	1.5098	0.843657
1.18207	1.54875	0.86341
1.58516	1.81849	0.985326
1.60005	1.89656	0.959789
1.48363	1.86775	0.880565
1.90984	2.19881	0.975315
2.69008	2.95945	1.01267
1.02119	1.36828	0.850313
1.99838	2.23029	1.00166
2.6838	3.08378	1.00045
2.59907	2.77679	1.05511
1.61545	1.9056	0.935073
1.05694	1.5063	0.788301
1.73544	2.11839	0.907885
0.765553	1.24561	0.676786
1.51732	1.89925	0.891024
1.38444	1.98259	0.78444
0.963038	1.31298	0.809921
0.876667	1.18016	0.811249
1.0443	1.43433	0.814854
1.05107	1.43986	0.813312
1.109	1.4819	0.821648
0.855753	1.26072	0.760297
1.33683	1.61864	0.902544
0.764421	1.27225	0.688174
1.14608	1.55151	0.823301
1.32755	1.65524	0.894026
1.21896	1.64839	0.805486
0.857755	1.26587	0.769163
1.16125	1.5503	0.82689
0.81505	1.30942	0.677128
1.24635	1.62555	0.862738
1.38422	1.59462	0.946074
1.41627	1.82651	0.861347
1.28414	1.68694	0.8458
0.908107	1.24765	0.791368
0.966194	1.32722	0.79929
0.816267	1.32848	0.677525
0.941384	1.36878	0.768095
1.08892	1.51327	0.858672
0.664449	1.12039	0.69765
1.07596	1.44541	0.837934
0.832357	1.26957	0.734583
0.935732	1.25833	0.833244
1.04198	1.37215	0.870228
1.02076	1.48807	0.823762
1.14616	1.53944	0.876429
1.16221	1.46206	0.890464
1.01715	1.51701	0.753785
1.23475	1.54031	0.88123
1.00363	1.21944	0.896399
2.57318	2.93187	0.971012
1.00321	1.25589	0.869663
1.24398	1.61594	0.878788
0.899166	1.21987	0.823735
0.943202	1.39627	0.780087
1.41302	1.72539	0.930632
0.900393	1.24019	0.791526
1.44052	1.89395	0.853011
1.11132	1.48416	0.825486
1.1425	1.44449	0.901596
1.3287	1.69546	0.904464
1.27964	1.81403	0.810763
1.26421	1.69642	0.877747
0.861982	1.16629	0.798915
1.55185	1.80077	0.991672
1.44277	2.08841	0.75557
1.02691	1.33914	0.861033
1.46937	1.72618	0.983076
0.944608	1.25326	0.85248
1.42762	1.7703	0.904773
0.898502	1.20123	0.841853
1.06698	1.48957	0.799175
0.99031	1.24902	0.886118
0.988683	1.42249	0.78133
0.801236	1.11839	0.793702
0.922279	1.23189	0.820126
1.45544	1.84472	0.888362
1.06844	1.44157	0.829515
1.44794	1.88721	0.834459
1.29749	1.6777	0.916384
1.05495	1.45666	0.801801
0.756908	1.06723	0.801419
1.1306	1.5478	0.863489
1.33301	1.94581	0.773544
1.36551	1.79168	0.861823
0.877028	1.20288	0.818823
2.28996	2.75652	0.932451
1.05154	1.45887	0.846542
0.78451	1.1235	0.781846
1.21116	1.49775	0.881216
0.977755	1.35345	0.833652
1.53437	1.71367	1.00751
0.992432	1.44336	0.840065
0.99617	1.25975	0.869222
1.20123	1.68095	0.784683
2.35575	2.58913	1.00786
1.5002	1.9657	0.845422
1.54692	1.86873	0.920274
1.0752	1.35793	0.907984
1.08412	1.424	0.853239
1.45965	1.66605	0.993595
0.966949	1.28313	0.84558
0.956976	1.14111	0.920293
1.39882	1.978	0.783074
1.37937	1.67596	0.931919
0.860688	1.40808	0.745991
2.63235	2.98612	0.992536
1.71401	1.94688	0.961282
1.08954	1.44578	0.86865
0.917481	1.35156	0.765464
1.41327	1.74187	0.910208
0.956039	1.30345	0.803848
1.16437	1.68389	0.766292
1.11176	1.47195	0.845314
1.06236	1.36256	0.872629
1.18255	1.51049	0.857667
1.04648	1.44665	0.819284
1.11281	1.49473	0.882243
1.21991	1.55978	0.846623
0.902949	1.27417	0.768864
1.42377	1.8679	0.8529
0.966815	1.24221	0.857463
1.38542	1.70518	0.905354
0.917801	1.33331	0.792435
1.18562	1.64894	0.805891
1.11539	1.47256	0.836992
1.1122	1.5603	0.838161
0.960977	1.29839	0.842693
1.06798	1.38632	0.870251
1.29563	1.63267	0.876489
0.980052	1.4158	0.782801
0.911502	1.26267	0.792516
0.998314	1.3718	0.82119
1.53112	1.94592	0.867153
1.33466	1.71532	0.876764
1.05201	1.39173	0.864793
0.913121	1.3328	0.779109
1.04644	1.44005	0.847902
0.966336	1.32322	0.801384
0.950978	1.3459	0.832211
1.11576	1.48488	0.842149
1.25024	1.55723	0.895173
1.00985	1.35317	0.81418
1.04894	1.4331	0.837587
0.735362	1.10411	0.787312
1.69451	2.23443	0.841442
1.19305	1.51215	0.889905
0.86368	1.33687	0.729463
1.71327	2.08786	0.886604
1.37723	1.68833	0.91779
1.20966	1.57364	0.87937
1.03774	1.4791	0.781658
1.82778	2.32512	0.882592
0.892944	1.2018	0.836193
1.00889	1.3722	0.804329
1.4455	1.91289	0.841101
1.07718	1.50332	0.827736
1.23739	1.67633	0.876144
0.904671	1.25933	0.781085
1.05422	1.44289	0.815344
1.14714	1.5165	0.879791
1.12536	1.57085	0.785526
0.884207	1.32994	0.749068
0.949778	1.23565	0.878169
1.07642	1.45794	0.842078
1.16097	1.43247	0.915191
1.19905	1.50919	0.904245
0.91237	1.24407	0.84445
1.51493	1.81344	0.977251
0.909093	1.30297	0.7774
1.15097	1.40201	0.927993
1.74406	1.92766	1.02302
0.73588	1.19251	0.757932
0.927602	1.28239	0.793515
0.938232	1.33354	0.816667
1.20589	1.51029	0.898041
0.938511	1.36491	0.788694
1.0372	1.3216	0.872679
2.02572	2.28704	0.982225
0.975426	1.41163	0.780586
1.22657	1.45046	0.951001
0.978313	1.26926	0.859815
1.06754	1.37613	0.87605
0.895588	1.3799	0.867257
1.21796	1.52871	0.91453
1.23337	1.55149	0.888089
1.23166	1.38376	0.992905
1.12211	1.5172	0.837355
1.36968	1.50646	1.00147
1.77832	2.28055	0.874094
1.10534	1.43261	0.866125
1.56647	2.02778	0.841739
1.51249	1.94906	0.85916
1.67307	1.9485	0.943859
1.67593	1.86467	0.982752
1.50855	1.90672	0.87239
1.55473	1.76334	0.983011
1.45783	1.86951	0.897249
1.04439	1.38891	0.901532
1.48871	2.01338	0.825898
1.42948	1.72514	0.934081
1.63736	2.04247	0.89793
1.72222	2.13245	0.895684
1.20737	1.56957	0.853581
1.14833	1.47109	0.865682
1.21058	1.61412	0.835416
1.64562	2.11178	0.875977
1.4719	1.84191	0.913137
1.09252	1.53999	0.823157
1.27426	1.60185	0.873835
1.74462	2.01621	0.954301
1.27286	1.75276	0.841645
1.46561	1.83417	0.863673
1.12544	1.43791	0.873076
1.14991	1.5022	0.864004
1.1006	1.27005	0.950649
1.52077	1.98537	0.840493
1.11806	1.24975	0.964844
1.74416	2.14229	0.959542
1.71253	2.09479	0.919291
1.58155	2.02159	0.878438
1.69208	2.03014	1.01292
1.68738	2.08312	0.92748
1.55089	1.90916	0.972053
1.74849	2.05499	0.939617
1.66992	1.85094	1.05912
1.42349	1.82814	0.86005
1.59323	1.78576	1.024
1.45745	1.68772	0.972889
1.1802	1.59496	0.844645
1.8936	2.21641	0.959172
1.41896	1.85992	0.888473
1.82678	2.16721	0.936611
1.73607	2.16575	0.877135
1.61641	2.16434	0.843113
1.55912	1.9737	0.877186
1.04043	1.44893	0.824969
1.57725	2.04596	0.857119
1.50518	2.00564	0.851775
1.68898	2.05734	0.927972
1.41508	1.95348	0.809088
1.15376	1.55354	0.821886
1.05263	1.40062	0.905008
1.64335	1.84963	0.985899
1.37545	1.81094	0.902897
1.38099	1.73633	0.895955
1.48815	1.83529	0.909475
1.44576	1.76993	0.906435
1.63271	1.98151	0.922308
1.31806	1.76404	0.889685
1.20319	1.52239	0.87939
1.6308	2.03289	0.90944
1.32426	1.66307	0.902404
1.35816	1.66277	0.921525
1.50732	1.84845	0.903962
1.42878	1.73864	0.924057
1.3803	1.64944	0.948688
1.32194	1.60225	0.918246
1.85356	2.11031	0.979506
1.2692	1.36584	1.00673
1.44165	1.85372	0.867394
1.58785	2.05701	0.919715
0.848694	1.31694	0.709866
1.20486	1.51157	0.910102
1.17141	1.54906	0.854654
1.31327	1.70252	0.87567
1.06658	1.29553	0.903321
1.10056	1.47342	0.843478
1.22923	1.45561	0.947821
1.08087	1.52536	0.821926
1.38249	1.96397	0.782215
1.29987	1.46969	0.965325
1.20421	1.53707	0.909854
1.12492	1.51703	0.823766
1.08476	1.5773	0.80945
1.11402	1.42395	0.883721
1.91791	2.15447	1.01829
1.41853	1.72184	0.930322
1.05757	1.32445	0.886263
2.1345	2.44249	0.961829
1.05695	1.40889	0.820336
1.08034	1.41956	0.851179
1.06515	1.41191	0.84635
1.42694	1.68974	0.954166
1.28947	1.57413	0.916668
1.35122	1.77389	0.887658
1.99056	2.45159	0.922123
1.1001	1.31161	0.936238
1.25521	1.41598	0.967063
1.03055	1.2925	0.878683
0.894942	1.11768	0.904645
1.84391	2.17293	0.950293
1.29281	1.62246	0.903728
1.65402	2.07803	0.891683
1.14134	1.38186	0.928796
1.29103	1.55289	0.920101
1.21818	1.47306	0.919955
2.07251	2.32815	1.00802
0.98687	1.26939	0.899699
1.74395	2.27188	0.850025
1.19855	1.49573	0.89056
1.26365	1.71782	0.850076
1.35583	1.69159	0.894497
1.16344	1.45671	0.882118
1.15243	1.50791	0.847749
1.23337	1.58501	0.857845
1.4567	1.8104	0.875517
0.968966	1.26299	0.849024
1.38186	1.64601	0.934418
1.08298	1.49634	0.814326
1.07087	1.49733	0.786848
1.4161	1.77901	0.886015
1.12461	1.41518	0.910568
1.4612	1.82332	0.904695
1.15695	1.43091	0.891264
1.42427	1.72748	0.909368
1.12061	1.55416	0.805328
1.36235	1.78752	0.847001
1.18082	1.50084	0.863331
1.47654	1.77938	0.937073
1.08016	1.44418	0.825906
1.56266	1.8409	0.947074
1.14978	1.67232	0.769783
1.06414	1.55926	0.754656
1.2679	1.67366	0.861886
1.18767	1.62612	0.813643
1.09837	1.48859	0.816012
1.4611	1.88668	0.869097
1.32299	1.71022	0.881952
1.3338	1.62087	0.897787
1.27376	1.84932	0.800628
1.28724	1.51459	0.930205
1.26215	1.4563	0.958019
1.17741	1.46112	0.912118
0.900524	1.42003	0.709765
1.37845	1.7137	0.894471
0.895398	1.41648	0.703868
1.09636	1.55096	0.815058
1.56999	2.12612	0.811843
1.57166	1.90389	0.922413
0.84245	1.31276	0.704837
0.972309	1.27042	0.833815
1.32538	1.62236	0.884656
1.1139	1.50979	0.816395
1.09202	1.41145	0.85963
1.44057	1.83159	0.872885
0.955627	1.3368	0.775147
1.98553	2.26957	0.977689
1.38622	1.74056	0.895798
1.96229	2.24429	0.974877
2.3423	2.54608	1.01681
1.47075	1.8921	0.895968
1.70485	2.43366	0.832458
1.08791	1.519	0.860003
0.777736	1.26578	0.681633
1.52403	1.86329	0.93721
1.47906	1.89535	0.869003
1.14963	1.66054	0.778762
1.55774	1.93243	0.882264
2.20218	2.44009	0.997126
1.62141	1.93595	0.929595
1.00499	1.26099	0.892792
1.06386	1.37519	0.916405
2.15537	2.27342	1.05382
0.934012	1.52457	0.688498
1.68573	2.15636	0.872183
1.12578	1.47273	0.885062
1.1219	1.42235	0.916033
1.49942	1.81079	0.911098
1.79364	2.0611	1.03125
1.22632	1.71709	0.81878
1.88994	2.26737	0.927584
1.02206	1.37205	0.858027
1.35332	1.58773	0.956029
1.51877	1.91666	0.896783
1.61234	1.65334	1.0566
1.98734	2.34076	0.97374
1.77518	2.13015	0.923629
1.2777	1.70252	0.84984
1.40564	1.65583	0.954411
1.21644	1.76529	0.798447
1.74095	2.0424	0.920165
1.69507	2.09908	0.909863
0.781594	1.24402	0.762148
1.73834	2.13037	0.898951
2.58832	2.70368	1.0383
1.78624	2.09859	0.947015
1.77004	2.1221	0.932673
1.68596	2.01886	0.935425
1.53914	1.74763	1.01316
1.52555	1.94485	0.860003
1.67351	2.07375	0.908683
1.21439	1.71836	0.785155
1.91903	2.21053	1.00037
1.26683	1.63698	0.857722
1.96632	2.36124	0.919028
1.5518	1.8557	0.952094
1.28316	1.48405	0.938962
1.70542	2.07424	0.94398
1.82797	2.006	1.00593
1.48757	1.69593	0.953917
1.55748	1.81426	1.01556
1.02643	1.33496	0.87871
1.39641	1.75823	0.927806
1.21323	1.58262	0.931255
1.27799	1.45368	0.991209
1.12001	1.48154	0.886674
1.36296	1.47002	1.02305
1.44643	1.77493	0.915721
1.23586	1.77546	0.846268
1.49244	1.86665	0.89969
1.09367	1.41972	0.87904
1.00682	1.3408	0.837506
0.874587	1.1354	0.877429
1.87294	2.17804	0.960938
0.818959	1.26159	0.738933
1.48322	1.77844	0.959396
1.65608	2.0824	0.905877
1.89883	2.11895	0.992807
1.87088	2.15135	1.05397
1.97787	2.08644	1.07026
1.33816	1.70517	0.889579
1.51836	2.03131	0.855481
1.50629	1.69104	0.963003
1.61553	1.90036	0.958237
1.96503	2.32716	0.936081
2.28798	2.52317	1.00534
1.01838	1.47964	0.786572
0.924	1.16981	0.892833
2.39813	2.57652	1.02955
1.19858	1.63664	0.835218
1.485	1.7528	0.942313
1.95372	2.14312	1.02064
1.29249	1.49459	0.987757
2.85656	3.1261	1.03127
1.67699	1.91845	0.980419
1.70154	1.9351	0.988418
1.09782	1.3438	0.915507
1.02233	1.26388	0.907593
1.45413	1.67958	0.969103
1.48697	1.84	0.992895
0.992816	1.34687	0.879263
0.877332	1.11619	0.864643
1.42875	1.62737	0.981309
1.2882	1.52895	0.946037
0.986881	1.25208	0.857291
1.21177	1.41565	0.958372
1.84651	2.27699	0.889157
1.76838	2.21002	0.890166
1.85404	2.33106	0.889244
1.65136	2.02294	0.922238
1.15721	1.53727	0.85107
0.98145	1.40537	0.799893
1.47233	1.79703	0.903073
1.22817	1.68468	0.808357
1.18412	1.65749	0.800336
1.08794	1.43229	0.866867
1.06805	1.37879	0.870824
1.08665	1.43061	0.868755
1.00643	1.23959	0.896757
1.01885	1.41856	0.809279
1.03398	1.31289	0.87381
1.47322	1.78374	0.931792
1.24331	1.59556	0.87601
1.36005	1.55694	0.964326
1.41968	1.70722	0.932966
0.775657	1.15528	0.803626
0.970388	1.33819	0.813829
1.06827	1.48599	0.823915
0.878439	1.23897	0.833894
0.97449	1.30591	0.832945
1.00502	1.27955	0.86176
1.35587	1.65071	0.910613
1.61257	2.00973	0.917372
1.92513	2.34721	0.911075
1.60923	1.96772	0.899607
1.43391	1.7719	0.889544
0.936347	1.30406	0.82652
0.963942	1.18054	0.892481
1.54232	2.00706	0.878124
1.35047	1.83301	0.887142
1.08598	1.42324	0.887431
1.50302	1.6885	1.01358
1.57031	1.84123	0.960865
1.86657	2.35814	0.915763
1.4762	1.81264	0.905122
1.54099	2.01364	0.875577
1.79027	2.24993	0.869911
1.32481	1.74392	0.8566
1.40231	1.80331	0.867309
1.08104	1.41269	0.858065
0.990852	1.33244	0.831379
0.907932	1.34997	0.758569
1.09787	1.45718	0.829725
1.61389	1.88788	0.922356
1.18838	1.59356	0.839214
1.11289	1.54033	0.855371
0.824166	1.22398	0.748862
0.721056	1.34506	0.627936
1.49799	1.76215	0.935059
1.31905	1.62414	0.910875
1.24516	1.70594	0.833609
1.26548	1.66492	0.850368
1.43929	1.70279	0.940306
1.45421	1.73603	0.918495
0.914583	1.27281	0.844314
0.91764	1.14646	0.893896
1.16786	1.59598	0.861313
0.946615	1.24393	0.859047
1.15846	1.44962	0.927989
1.19909	1.55556	0.867239
0.801056	1.17454	0.769101
0.932966	1.25343	0.815321
1.0098	1.39844	0.803366
1.05399	1.46549	0.868431
1.09495	1.42498	0.909158
1.18117	1.52805	0.882221
1.9494	2.41647	0.903808
1.92562	2.3224	0.93298
1.62242	1.99261	0.90748
1.11651	1.33512	0.990948
1.23876	1.422	0.970155
1.35039	1.63085	0.935056
1.22669	1.50053	0.907403
1.11601	1.32424	0.930655
1.23179	1.27125	1.06314
1.8454	2.35544	0.866136
1.33292	1.68986	0.953432
1.36267	1.65384	0.935917
1.32347	1.72305	0.874468
1.63738	1.97273	0.933484
1.1615	1.52634	0.852363
1.05751	1.49778	0.793524
1.22565	1.55741	0.894211
1.1654	1.52014	0.892676
1.79612	1.84976	1.10822
2.01258	2.08334	1.0884
1.27814	1.58195	0.897555
1.49287	1.8389	0.898991
1.40117	1.77999	0.949035
1.36587	1.68325	0.922128
1.37413	1.7851	0.896001
1.39201	1.74132	0.910444
1.73068	1.88312	1.03613
1.66686	1.83262	1.028
1.28893	1.64378	0.860447
1.52982	2.02627	0.85315
1.5575	2.02599	0.862559
1.37919	1.74419	0.875714
1.80792	2.04271	1.02077
1.13655	1.44733	0.950168
1.28557	1.62395	0.937972
1.02765	1.35023	0.866007
1.03563	1.14981	1.01255
1.21401	1.48827	0.909018
1.07298	1.37727	0.875729
1.14326	1.3767	0.953194
1.28141	1.44069	0.985317
1.06611	1.38724	0.885711
1.08822	1.44549	0.916762
1.00709	1.48479	0.799308
1.20486	1.51783	0.8956
1.75715	2.14071	0.903139
1.58101	2.04931	0.868823
0.81437	1.36055	0.67919
1.19723	1.70212	0.811303
1.62198	2.03964	0.876026
1.25303	1.41577	0.964902
0.934714	1.12289	0.930319
2.09298	2.42215	0.962185
0.998506	1.37448	0.813724
0.989219	1.31182	0.833806
1.81931	2.18658	0.94928
1.77269	2.06961	0.96128
1.81028	2.04452	0.978628
1.91695	2.17935	0.992932
2.26614	2.49155	0.990933
1.31825	1.71475	0.865989
1.55021	1.89731	0.925208
1.50055	1.94492	0.841162
1.16675	1.57074	0.880025
1.77963	1.89251	1.04527
1.79832	1.8806	1.06297
1.23667	1.66126	0.843015
1.50219	1.8804	0.886796
1.58411	2.07611	0.862517
1.78606	2.23327	0.943018
1.65553	2.04219	0.908185
1.68575	1.98111	0.975069
2.01262	2.22917	1.00061
2.05331	2.44829	0.941084
1.04336	1.31212	0.901882
1.10037	1.38159	0.918536
1.41317	1.65047	0.946862
0.978906	1.37087	0.857242
1.11346	1.33502	0.952017
1.1486	1.44462	0.995497
1.3628	1.52888	0.984469
2.08861	2.35616	1.01795
1.71333	1.89436	1.0139
1.1457	1.45518	0.918913
1.1532	1.37338	0.942636
1.44995	1.74531	0.974561
1.3918	1.58253	1.01361
1.91142	2.49222	0.851261
2.35486	2.92152	0.893627
1.07448	1.45799	0.832501
1.03227	1.5297	0.758326
1.33023	1.56477	0.955968
1.26516	1.68311	0.880698
1.2104	1.68435	0.81603
1.19528	1.71377	0.788393
1.24191	1.76098	0.78404
0.97758	1.45983	0.791997
1.17992	1.39368	0.941921
1.50346	1.70972	1.00747
1.42935	1.92417	0.819824
1.43804	1.74485	0.909407
1.2088	1.4934	0.887262
1.17157	1.52707	0.865676
1.02814	1.38806	0.830245
1.20294	1.54424	0.90085
1.10157	1.37218	0.912176
1.67737	2.16276	0.885036
1.55965	1.94015	0.894373
1.07162	1.35699	0.886209
1.50356	1.84027	0.915396
1.68012	2.11313	0.903226
0.874258	1.22798	0.808989
1.68874	1.89847	0.949798
0.96318	1.25414	0.856553
1.04922	1.37973	0.85585
1.29226	1.63912	0.879422
1.14578	1.43042	0.878961
1.58171	1.95862	0.912556
1.63493	1.92102	0.945187
1.56674	1.94451	0.896729
1.39332	1.71951	0.90443
1.54816	2.02097	0.871585
1.40536	1.71708	0.952763
1.56192	1.93264	0.902587
1.65606	2.17431	0.855537
1.61811	2.13445	0.862448
1.46287	1.82819	0.900597
1.08035	1.5269	0.838798
1.68691	1.96526	0.959372
1.62398	2.05641	0.875545
1.795	2.14739	0.938458
1.06712	1.30393	0.909341
0.95703	1.26983	0.845271
0.885219	1.20087	0.864625
1.62674	2.05498	0.879343
2.00561	2.39179	0.922492
1.65825	1.86035	0.956043
1.77236	2.03015	0.978151
1.66525	1.9308	0.948187
1.80404	2.09561	0.96284
1.63459	2.05475	0.882424
1.18319	1.54151	0.837091
1.11866	1.43468	0.862035
0.978493	1.35295	0.83315
1.09166	1.43624	0.829146
0.971317	1.37506	0.788498
1.19711	1.78887	0.751081
1.45734	1.80978	0.90237
1.10802	1.44198	0.86953
1.3991	1.78859	0.862462
1.12344	1.5288	0.814481
0.878849	1.20271	0.820059
0.998554	1.37906	0.826092
1.32004	1.75468	0.851578
0.982325	1.49536	0.731101
1.3248	1.82063	0.832963
0.966084	1.32055	0.805895
0.970324	1.26818	0.854168
1.05597	1.37258	0.859546
0.910889	1.34744	0.766608
1.34613	1.66135	0.948506
0.922065	1.37883	0.793387
1.32872	1.73498	0.852333
1.10664	1.51795	0.801644
1.24864	1.60856	0.853279
0.961968	1.35588	0.804246
1.47708	1.75038	0.956482
1.29866	1.63911	0.877945
1.1845	1.56699	0.83644
1.32599	1.58375	0.937415
0.88311	1.25624	0.779975
1.11005	1.39888	0.874805
1.6932	2.13754	0.886133
1.29176	1.72314	0.841531
0.894432	1.31161	0.752095
1.65765	2.05375	0.89679
1.84483	2.14984	0.953678
1.35213	1.66134	0.900899
1.16967	1.51349	0.862033
0.833431	1.23222	0.738903
1.53203	1.92849	0.890567
1.92637	2.23089	0.941534
0.64949	0.950223	0.786714
0.824677	1.16866	0.766107
1.66265	2.2445	0.816583
0.97293	1.32623	0.814256
0.961512	1.25349	0.87191
1.19633	1.70207	0.775899
0.996861	1.3954	0.814018
1.33304	1.71193	0.871305
0.939296	1.20902	0.843559
0.946108	1.36001	0.809579
1.36713	1.71488	0.89269
1.07705	1.72738	0.715629
1.202	1.52297	0.86697
1.32751	1.68126	0.878825
1.19052	1.63608	0.806513
1.70408	2.33315	0.809044
1.54577	2.08633	0.819091
1.26576	1.69479	0.828575
1.21333	1.59365	0.8845
1.78792	2.33079	0.849957
1.26439	1.69232	0.842355
1.24224	1.49732	0.98333
1.66572	2.10143	0.878932
1.08353	1.32153	0.915276
1.084	1.56207	0.778921
1.1435	1.52779	0.899542
1.1356	1.32928	0.942847
1.53817	1.89891	0.91068
1.60481	1.89627	0.912651
1.97568	2.4762	0.886206
0.89902	1.27254	0.786447
1.08407	1.4541	0.871842
1.92056	2.41398	0.889201
1.76125	2.11103	0.923481
1.2424	1.51069	0.920835
1.56946	1.87469	0.927121
1.57288	1.89728	0.931072
1.10171	1.31847	0.918297
1.13029	1.43791	0.881804
1.25657	1.8445	0.782946
1.56923	1.94008	0.904668
1.12143	1.4417	0.884882
1.44073	1.78212	0.914406
1.51108	1.96194	0.860072
0.991063	1.263	0.877809
0.966604	1.52717	0.753009
1.19183	1.49833	0.8842
0.954758	1.30682	0.814843
1.80955	2.09785	0.973641
0.932589	1.31087	0.78537
1.46365	1.78117	0.912773
1.23817	1.56681	0.914919
0.934565	1.29123	0.801811
1.52095	1.71501	1.04517
1.05939	1.41221	0.852547
1.17766	1.42346	0.924709
1.30246	1.57242	0.901094
1.3729	1.72095	0.89289
1.37855	1.65757	0.93849
1.43324	1.68665	0.937663
0.946962	1.31321	0.81497
1.92985	2.3333	0.91724
1.33844	1.69435	0.938083
1.52882	1.8168	0.942095
0.885816	1.18343	0.831095
1.87871	2.44976	0.848527
1.4109	1.72526	0.915999
1.42664	1.80991	0.917069
1.40315	1.76101	0.898509
0.686011	1.0735	0.742933
1.56714	1.89531	0.923312
0.827573	1.30586	0.752815
1.29095	1.45674	0.99169
1.12122	1.38519	0.922843
0.925158	1.19611	0.859501
1.46827	1.57906	1.0242
1.30447	1.7676	0.85956
1.19273	1.59421	0.836242
1.20632	1.51053	0.910836
1.01214	1.39559	0.805873
1.0553	1.44062	0.839911
1.49836	1.88598	0.880638
1.2482	1.57304	0.866228
1.11582	1.46849	0.969737
0.923007	1.40158	0.761869
1.26812	1.52952	0.939048
1.14943	1.48128	0.895472
0.95133	1.31399	0.808159
1.22707	1.66425	0.863668
1.18473	1.30968	0.970033
1.20346	1.48142	0.900327
1.43578	1.6908	0.956825
1.29207	1.60208	0.889754
1.1618	1.76598	0.730095
1.30099	1.58891	0.900156
1.26289	1.54143	0.88944
1.21267	1.52289	0.932026
0.923416	1.26057	0.833102
0.861551	1.15031	0.84573
1.25639	1.51306	0.931056
1.07736	1.4254	0.882653
0.75637	1.26455	0.693978
1.01801	1.44974	0.790055
1.55744	1.88832	0.935693
0.941779	1.54046	0.748981
1.56275	1.6471	1.05101
1.42325	1.65134	0.940624
0.792152	1.19577	0.738948
1.14475	1.56953	0.839335
1.53235	1.94692	0.891883
0.735643	1.07142	0.743073
1.37135	1.63158	0.921872
1.46621	1.71172	0.942571
1.29124	1.62025	0.878229
1.32756	1.666	0.899723
1.52993	1.8031	0.9346
0.852173	1.28083	0.791454
0.972396	1.28407	0.830834
1.55944	1.85935	0.984256
1.64926	1.8689	0.984448
1.50118	1.69799	1.00643
1.24321	1.71018	0.818308
1.22557	1.43909	0.943598
1.38354	1.65114	0.930673
1.13459	1.65109	0.774042
1.13508	1.50075	0.868786
1.37024	1.66841	0.946208
0.922313	1.41017	0.807083
1.13666	1.41317	0.892345
1.06909	1.3733	0.876199
1.14538	1.38302	0.931022
1.13371	1.44207	0.895694
1.02073	1.39423	0.822385
0.845892	1.25737	0.732704
0.625555	1.05837	0.690091
2.61493	2.86538	1.03023
1.28376	1.50139	0.946207
1.23636	1.81618	0.764632
1.69298	2.23847	0.834906
1.50093	1.9847	0.865776
1.58928	1.81468	0.987538
1.44276	1.80203	0.899641
1.25312	1.4717	0.936604
1.48736	1.89391	0.881472
1.38081	1.76934	0.871076
1.57482	1.76411	0.98358
1.30437	1.64896	0.900553
1.57003	1.92897	0.901446
1.29772	1.59495	0.916137
1.58828	2.02836	0.872401
1.29075	1.51565	0.974114
1.59257	1.7933	1.03917
1.52121	1.91256	0.884917
1.52867	1.72144	1.00438
1.17895	1.60427	0.9142
1.09131	1.36396	0.906502
1.12942	1.42609	0.896358
1.59861	1.91788	0.939804
1.04778	1.3806	0.854587
1.05135	1.33395	0.903488
1.08526	1.4574	0.885067
1.11142	1.36843	0.928959
1.53946	1.74133	0.991093
1.33546	1.67722	0.876741
0.99504	1.35942	0.921662
1.22252	1.49859	0.94606
1.36538	1.5895	1.00643
1.56463	1.88998	0.929762
1.16141	1.43016	0.902989
1.32992	1.64067	0.915373
1.37282	1.63572	0.941509
1.23442	1.49714	0.916928
1.35106	1.63948	0.940581
1.25581	1.59635	0.912903
1.46534	1.55894	1.05515
1.79338	2.09519	0.958104
1.74959	2.14043	0.912775
1.57048	1.93128	0.933259
1.52585	1.83807	0.929684
1.45399	1.6298	1.00957
1.1349	1.53274	0.891526
1.20472	1.54892	0.926694
1.21674	1.53828	0.881696
1.16577	1.4855	0.950743
1.2803	1.60637	0.91269
1.71181	2.09879	0.914246
1.65707	1.93323	0.937006
1.14963	1.52042	0.835396
1.18338	1.63199	0.810864
1.73207	2.29273	0.836884
1.19509	1.70404	0.813228
1.42959	1.81823	0.88191
1.19711	1.54223	0.917278
1.6375	1.94227	0.929395
2.0022	2.30818	0.963762
1.82963	2.15399	0.951805
2.32108	2.85177	0.902276
1.87533	1.96436	1.04742
1.02321	1.42136	0.842382
1.60885	2.00148	0.925224
1.6006	1.92526	0.936176
1.78171	2.14707	0.927543
1.64637	2.01899	0.914059
1.73512	2.1613	0.885106
1.7658	2.09279	0.936443
1.36127	1.69138	0.91318
1.80344	2.20387	0.915373
1.61427	1.96376	0.964557
1.49434	1.75404	0.96926
1.83766	2.19332	0.951955
1.41423	1.75226	0.899115
1.98798	2.24417	0.988844
1.44289	1.80484	0.881783
1.59378	1.9476	0.912413
1.73059	2.03792	0.948818
1.57637	1.95663	0.905178
1.18015	1.39436	0.961808
1.57859	1.9787	0.923925
1.5908	1.77634	0.994503
2.04315	2.44853	0.925462
1.59541	1.92209	0.927015
1.04336	1.42581	0.82024
0.904671	1.31281	0.758504
1.62886	1.95285	0.912584
0.961518	1.29907	0.817232
1.75786	2.00194	0.98815
1.09791	1.41037	0.893593
1.704	1.94692	0.977024
1.70817	1.94089	0.972205
2.00091	2.27996	0.987579
1.12841	1.42301	0.891759
1.17499	1.43662	0.914346
0.97663	1.32698	0.816956
1.3271	1.62449	0.892763
1.66518	2.04196	0.941318
1.47868	1.83451	0.926626
1.35304	1.7029	0.878293
1.37796	1.88641	0.821777
1.30187	1.70922	0.856394
1.79108	2.1638	0.911227
1.99596	2.39058	0.947111
1.98904	2.38046	0.923568
1.84897	2.32185	0.888888
1.24572	1.477	0.966658
1.50454	1.83303	0.946415
1.97814	2.34849	0.937048
0.973228	1.41054	0.856432
1.89385	2.19736	0.940455
1.73022	2.12328	0.912937
1.91727	2.3334	0.902881
1.26269	1.56185	0.888297
1.04978	1.47204	0.837117
1.7085	2.09556	0.909347
1.50204	1.80837	0.929406
1.48511	1.88646	0.879271
0.804788	1.21454	0.775291
0.958301	1.29015	0.821699
1.19771	1.63889	0.841481
1.16959	1.29239	0.993175
1.25564	1.56959	0.964925
1.25887	1.39857	1.0307
1.51861	1.8376	0.964971
1.59528	1.88194	0.946597
0.900859	1.38407	0.73875
1.0785	1.42984	0.851679
1.01509	1.49158	0.758234
[truncated: 734 more rows]
