# Supplementary material for: WhyD tailors surface polymers to prevent premature bacteriolysis and direct cell elongation in Streptococcus pneumoniae
Source: eLife journal article supplement (doi:10.7554/elife.76392), 2022-05-20
Supplement: fig7-figsupp2-data1 [file Figure - figure supplement 2 - source data.xlsx]

## Sheet: 61620_sb
ΔlytA -Zn	ΔlytA +Zn	ΔlytA pZn-whyD -Zn	ΔlytA pZn-whyD +Zn
0.0017156	0.00241094	0.00154849	5.28382e-06
0.00080258	0.00210817	0.0014789	6.2311e-06
0.00212861	0.003256	0.00156574	3.30391e-06
0.00258601	0.00305011	0.00211619	4.81483e-06
0.00295131	0.00239075	0.00185583	7.85995e-06
0.00190533	0.00289797	0.00175411	2.07263e-05
0.00310645	0.0033534	0.000732775	1.45968e-05
0.00310045	0.00405674	0.00152027	2.41527e-05
0.00235155	0.0024224	0.00188834	2.28325e-05
0.00332705	0.000706355	0.000904104	1.80137e-05
0.00393647	0.00193406	0.00185008	2.6464e-05
0.00332175	0.0046884	0.000579304	2.44608e-05
0.00260497	0.00576602	0.00229307	3.10401e-05
0.0036819	0.00603161	0.00202742	2.20623e-05
0.0027944	0.00443376	0.00127716	4.04572e-05
0.00207168	0.00303759	0.00206617	3.63322e-05
0.00293513	0.00190616	0.00129288	3.70099e-05
0.00534983	0.00121524	0.000668338	2.81865e-05
0.00257752	0.0010401	0.000426723	3.75843e-05
0.00142287	0.00134884	0.000670133	2.99831e-05
0.00147272	0.00171951	0.00178882	5.66372e-05
0.00112169	0.00236615	0.0012577	4.14384e-05
0.00609391	0.00248569	0.00123979	3.72061e-05
0.00194721	0.00223367	0.00127218	4.73274e-05
0.00260257	0.00188105	0.00214692	2.00157e-05
0.00330298	0.000892844	0.0021987	4.17522e-06
0.0033426	0.00161672	0.00193419	6.99506e-06
0.00216087	0.00286193	0.00124334	1.54029e-05
0.00217983	0.00229675	0.00116056	5.95602e-06
0.00309098	0.00325925	0.00203472	1.1073e-05
0.0022819	0.00333995	0.00178496	9.3759e-06
0.00159803	0.00235384	0.00110662	8.10233e-06
0.00215787	0.00201961	0.00101645	1.27842e-05
0.00199261	0.00276412	0.00140322	1.11605e-05
0.00263784	0.00408853	0.000957876	4.27842e-06
0.00282454	0.00314984	0.00115687	6.61831e-06
0.00343593	0.00366343	0.00153406	7.31548e-06
0.00476914	0.00341022	0.00119252	1.10606e-05
0.00133694	0.00188552	0.00164757	8.50853e-06
0.00307585	0.00169079	0.00109896	9.68176e-06
0.00235519	0.00438	0.00127337	8.10226e-06
0.00189314	0.00347645	0.00112603	1.49995e-05
0.000940129	0.00524697	0.000577959	1.46371e-05
0.0014078	0.0014316	0.00137159	1.46327e-05
0.00137483	0.00157304	0.00158739	1.46087e-05
0.00240254	0.00161076	0.00138422	1.501e-05
0.00216779	0.00283382	0.0018571	1.28913e-05
0.00360896	0.00159093	0.00172515	1.67779e-05
0.00392873	0.00169319	0.00112228	2.46959e-05
0.00469502	0.00205989	0.000875756	2.94199e-05
0.00100123	0.00102636	0.000756441	2.60696e-05
0.00205268	0.00516056	0.000753903	2.66524e-05
0.00380169	0.00321486	0.00137395	3.46795e-05
0.00300582	0.00384202	0.000341411	3.73214e-05
0.00241888	0.00322855	0.000462663	4.05408e-05
0.00126575	0.00365396	0.000531107	4.09897e-05
0.0039163	0.00470849	0.000998605	4.13343e-05
0.00100045	0.00406225	0.00110107	3.37495e-05
0.0027276	0.00379497	0.000995622	3.96262e-05
0.00138245	0.00390995	0.00145863	3.04508e-05
0.00271797	0.00260066	0.00149859	4.76943e-05
0.00234927	0.00156916	0.00116347	4.0706e-05
0.00329116	0.00162372	0.00173837	4.18813e-05
0.00218533	0.00304865	0.00151743	3.32368e-05
0.00275307	0.00135085	0.0022016	3.3346e-05
0.00218494	0.00162843	0.00165279	2.95429e-05
0.00290007	0.00288917	0.00120249	3.73804e-05
0.00238717	0.001647	0.00144707	3.29068e-05
0.00199802	0.00279972	0.00232539	3.40621e-05
0.00285327	0.00278239	0.00219695	1.71231e-05
0.00190425	0.00472806	0.00296826	1.81973e-05
0.00194743	0.00261578	0.000781861	1.88362e-05
0.00216313	0.00258282	0.00180764	2.03211e-05
0.0012068	0.00416685	0.000816893	2.59402e-05
0.00125466	0.00376159	0.00074454	3.68604e-05
0.00160851	0.00197668	0.00103259	4.36093e-05
0.00210735	0.00279982	0.00106225	4.39396e-05
0.00131636	0.0021729	0.000766748	4.73384e-05
0.00203711	0.0017844	0.00110025	4.2806e-05
0.00264205	0.00303213	0.00153324	4.0228e-05
0.00267972	0.00170707	0.00176224	4.36983e-05
0.00237117	0.00236844	0.000126175	3.92169e-05
0.00226075	0.00180622	0.00299313	4.12067e-05
0.00284723	0.000820467	0.00105176	1.0075e-05
0.00128387	0.00219156	0.000630264	1.43631e-05
0.00218989	0.00194313	0.00114568	2.47287e-05
0.000997459	0.00363889	0.00113248	2.60465e-05
0.00151035	0.00623652	0.000480858	3.02867e-06
0.00284451	0.00615816	0.00111823	2.73083e-06
0.00261685	0.00167588	0.00291073	8.02529e-06
0.00334	0.00273616	0.00116701	1.11149e-05
0.00309343	0.00348817	0.00190854	9.47475e-06
0.00154085	0.00211934	0.00034796	6.33333e-06
0.00287373	0.00183755	0.000721275	1.53584e-05
0.00230706	0.0037138	0.0027116	1.16711e-05
0.00293954	0.00279755	0.000511157	1.53384e-05
0.00256893	0.00344993	0.00254255	1.6745e-05
0.00300368	0.00269781	0.000824165	1.24602e-05
0.00202003	0.00264327	0.00288249	1.28783e-05
0.00201331	0.00275017	0.00154194	1.25493e-05
0.00157179	0.00288922	0.000962623	1.54145e-05
0.0016747	0.00230931	0.00146841	2.37579e-05
0.00473566	0.00155251	0.00121084	1.90699e-05
0.000956456	0.00145206	0.0012032	4.16083e-05
0.00643459	0.00303377	0.000807546	3.8904e-05
0.00388402	0.00323486	0.000736169	3.6173e-05
0.00274611	0.00303987	0.00203493	3.07478e-05
0.00276455	0.00130773	0.0014145	3.91625e-05
0.00192706	0.00147146	0.00163213	3.69614e-05
0.00276383	0.00186642	0.00196073	4.08465e-05
0.00232285	0.00222916	0.00160933	4.41252e-05
0.00227654	0.0016528	0.000662628	3.59749e-05
0.00333909	0.00315853	0.00153723	3.6175e-05
0.003737	0.00387078	0.00140628	2.24927e-05
0.00463048	0.00229983	0.00169288	2.53288e-05
0.0033971	0.00456947	0.00125447	1.38768e-05
0.00232168	0.00154518	0.00222812	1.13306e-05
0.00928183	0.00574277	0.00380191	4.00255e-05
0.0041514	0.00547344	0.00188336	3.91639e-05
0.00135547	0.00297422	0.00122081	1.30468e-05
0.00423185	0.00221974	0.00189004	8.64947e-06
0.00361726	0.00165813	0.00135478	1.47599e-05
0.00384528	0.00288145	0.00147204	1.22647e-05
0.00259162	0.00250408	0.00149875	1.50728e-05
0.0033834	0.00645358	0.00112165	1.47584e-05
0.00274978	0.00129759	0.000583024	2.2308e-05
0.00299101	0.00209628	0.00065382	1.61857e-05
0.000726275	0.00220777	0.000173869	1.78435e-05
0.00401794	0.00147138	0.000908572	2.20637e-05
0.00517055	0.00163546	0.00199614	3.37569e-05
0.00418284	0.00325033	0.00157768	1.46874e-05
0.00417252	0.00363658	0.00221812	1.75951e-05
0.00330812	0.00576114	0.00147012	1.28944e-05
0.00160988	0.00341847	0.00113397	2.11838e-05
0.00299508	0.00367335	0.000204904	1.78977e-05
0.00291781	0.00479635	0.000786792	8.36504e-06
0.00330758	0.00291703	0.00100993	1.02854e-05
0.00255837	0.00257029	0.00134645	9.42247e-06
0.00308948	0.00139706	0.000933409	8.46863e-06
0.00306189	0.00471253	0.00104449	6.90036e-06
0.00213898	0.00332696	0.00111838	9.01111e-06
0.00217902	0.0061223	0.00174266	1.49388e-05
0.0020183	0.00306278	0.00164052	1.35267e-05
0.0032243	0.0016594	0.00133201	1.14138e-05
0.00268987	0.00172294	0.00133288	1.28233e-05
0.0018122	0.0019536	0.00097392	1.18695e-05
0.00171139	0.000863261	0.00216532	2.78151e-05
0.00260558	0.00268822	0.00135934	2.67471e-05
0.00347841	0.00401227	0.000631332	2.44645e-05
0.00605738	0.00280654	0.00157708	2.51305e-05
0.00385435	0.00184889	0.00139038	1.63543e-05
0.00652005	0.00301049	0.00140603	1.66561e-05
0.00152232	0.00235097	0.00128275	2.12736e-05
0.0031771	0.00329748	0.00163913	2.3174e-05
0.00347781	0.00268852	0.00265922	2.21697e-05
0.00288416	0.00297378	0.00324199	1.58467e-05
0.00209105	0.00313323	0.00241001	2.86906e-05
0.00529953	0.00256776	0.00136044	3.92167e-05
0.0024985	0.00268452	0.00206161	3.85629e-05
0.0030379	0.00318435	0.00126814	3.69317e-05
0.00286381	0.00194324	0.00115445	3.37241e-05
0.00163064	0.00235338	0.000942163	3.58674e-05
0.00303877	0.00340074	0.000870118	2.4826e-05
0.0032094	0.0022886	0.000823048	2.28684e-05
0.00340861	0.00349834	0.00113817	3.14707e-05
0.00303213	0.002009	0.00182896	2.75483e-05
0.00229467	0.00361711	0.00161512	3.75246e-05
0.00377881	0.00288572	0.00138138	3.85543e-05
0.00191915	0.00195212	0.00208527	3.89132e-05
0.00195588	0.00669421	0.00101819	3.82832e-05
0.00523234	0.00347002	0.0015202	3.07574e-05
0.00298159	0.00282824	0.00134319	3.26237e-05
0.00221127	0.00360958	0.00071335	2.51359e-05
0.00500412	0.00201284	0.000828399	2.45933e-05
0.00593984	0.00304385	0.000848918	9.67641e-06
0.00788649	0.00365966	0.000990028	7.47763e-06
0.0025678	0.0034791	0.00052857	1.15595e-05
0.00355627	0.00197007	0.00126056	1.39085e-05
0.00174331	0.0025445	0.00152992	1.59586e-05
0.00125178	0.00396043	0.000550433	2.24252e-05
0.00223441	0.00248016	0.00223432	2.40696e-05
0.00264444	0.00378984	0.00196092	1.78805e-05
0.00039829	0.00273882	0.00164213	1.87926e-05
0.00297395	0.00295237	0.00137905	2.31183e-05
0.00319503	0.00282094	0.00202763	3.43057e-05
0.00381493	0.00243049	0.00190202	3.6508e-05
0.00432568	0.00210464	0.00171517	3.74219e-05
0.004082	0.00156753	0.00113459	7.08906e-06
0.00298769	0.00212293	0.00163042	7.6575e-06
0.00254871	0.00257471	0.0012388	1.04124e-05
0.00263392	0.00315919	0.00119527	1.02838e-05
0.00396934	0.00346746	0.00121885	1.31255e-05
0.00365266	0.0013718	0.0019761	1.21937e-05
0.0042042	0.00229909	0.000950199	7.45639e-06
0.00366155	0.00099045	0.00125083	9.12977e-06
0.00592495	0.00275281	0.00129417	6.31802e-06
0.00275387	0.00237903	0.00134466	7.10863e-06
0.00312704	0.00199711	0.0014554	6.64656e-06
0.00369545	0.00238428	0.0010768	3.05686e-05
0.00349923	0.003929	0.00150395	2.67566e-05
0.0013459	0.00378623	0.00131066	2.03789e-05
0.00336239	0.00333989	0.00169992	2.07566e-05
0.00383667	0.00257718	0.00114054	3.47319e-05
0.00271727	0.00179034	0.00366591	4.09702e-05
0.00400042	0.00193474	0.00213038	3.75559e-05
0.00238087	0.0028766	0.00353888	3.60701e-05
0.00149658	0.00318069	0.00323419	3.94403e-05
0.00139493	0.00276269	0.00118618	3.80601e-05
0.00398844	0.00307809	0.00112567	1.19451e-05
0.00332484	0.00220263	0.00137978	1.82417e-05
0.00849431	0.00208848	0.00164248	7.57646e-06
0.00540318	0.00429288	0.0011785	8.62663e-06
0.00593683	0.00315714	0.00145001	7.10042e-06
0.00278124	0.00221919	0.00163085	1.2761e-05
0.00213233	0.00309071	0.00112728	1.00304e-05
0.00147246	0.00193485	0.00129792	1.31317e-05
0.0015278	0.00191438	0.00142769	1.1708e-05
0.000617588	0.00362962	0.00102666	1.11362e-05
0.00251509	0.00323027	0.000280682	1.06898e-05
0.00347316	0.00326859	0.000282617	3.42081e-05
0.00167007	0.00143668	0.00190795	3.6318e-05
0.00183191	0.00267759	0.000920814	3.16276e-05
0.00182387	0.003691	0.000613529	3.75651e-05
0.00310697	0.0045508	0.000409944	3.40243e-05
0.00318666	0.00346288	0.00138419	3.12302e-05
0.00297158	0.00281763	0.00121936	3.51816e-05
0.00329401	0.00138252	0.000493969	3.25818e-05
0.0044379	0.00149903	0.000316928	3.46419e-05
0.00391295	0.00273604	0.000962733	3.6017e-05
0.0033932	0.00267106	0.000579496	1.98849e-06
0.00203016	0.00211216	0.000811049	1.44436e-06
0.00185054	0.00124294	0.00126666	5.00682e-06
0.0029291	0.00233833	0.00138498	6.05816e-06
0.00289838	0.00201849	0.00129918	5.85895e-06
0.000482486	0.00271287	0.00105513	1.24846e-05
0.00271172	0.00289903	0.00150447	1.74721e-05
0.00242803	0.002529	0.000982721	5.236e-06
0.00207911	0.00363238	0.00117379	6.57955e-06
0.00317245	0.00403901	0.000399244	6.10337e-06
0.00225992	0.00436217	0.0011859	1.34061e-05
0.00276968	0.00214796	0.00118033	1.261e-05
0.00372203	0.00411177	0.000761038	1.24942e-05
0.00170536	0.00379179	0.00139061	2.61342e-05
0.00118242	0.00363567	0.00059958	2.00353e-05
0.00242775	0.00373799	0.0020949	1.84201e-05
0.00305454	0.00152803	0.00207033	1.78847e-05
0.00268995	0.00432957	0.00242313	1.97186e-05
0.00192794	0.0041977	0.00165548	1.75973e-05
0.0047067	0.00248957	0.00182183	1.93234e-06
0.00341099	0.00393131	0.00153194	1.4395e-06
0.00185034	0.00330513	0.00169364	7.53128e-06
0.00214112	0.00205384	0.000798094	2.13771e-06
0.00401315	0.00241206	0.00112754	5.74833e-06
0.00225919	0.00355708	0.000669677	4.01626e-06
0.00174494	0.00275613	0.00116516	1.10512e-05
0.00530055	0.00323624	0.00126506	1.04762e-05
0.00333671	0.00278295	0.00134893	1.17451e-05
0.00510704	0.00374381	0.000876942	9.90862e-06
0.00518863	0.00421068	0.000803187	1.14387e-05
0.00377742	0.00331296	0.00157252	1.49229e-05
0.00376003	0.00327521	0.00165052	1.21621e-05
0.00339723	0.00270476	0.00116854	9.79641e-06
0.00253704	0.00292159	0.00193207	9.64307e-06
0.00486235	0.00379253	0.00119409	8.62219e-06
0.00539986	0.00215912	0.0010384	1.06606e-05
0.00320478	0.00391884	0.00121224	7.27822e-06
0.00440191	0.00317636	0.00102957	1.23168e-05
0.00183455	0.00426219	8.37005e-05	1.25031e-05
0.003128	0.00270078	0.000235233	1.13791e-05
0.00287791	0.00291655	0.000961993	1.88585e-05
0.00225014	0.00369393	0.00104577	1.27591e-05
0.00188036	0.00570352	0.000567831	1.1885e-05
0.00169479	0.00330511	0.001937	2.15942e-05
0.00340009	0.00408784	0.000783283	1.78918e-05
0.00275665	0.0026384	0.000936612	1.5292e-05
0.00447519	0.00385172	0.00105085	1.37243e-05
0.000637335	0.00385769	0.00131063	1.22064e-05
0.00293332	0.00298961	0.00108385	9.91691e-06
0.00398282	0.00525939	0.001849	2.06116e-05
0.00313857	0.00386033	0.00128446	2.47465e-05
0.00458462	0.00189386	0.00138589	3.20186e-05
0.00386277	0.00105032	0.00426681	2.70971e-05
0.00307792	0.00185962	0.00185667	4.78203e-06
0.00276161	0.00354032	0.00211286	2.53615e-06
0.00314229	0.00369091	0.00170622	5.41716e-06
0.00242025	0.0046162	0.00116276	5.08513e-06
0.00404502	0.00514942	0.000843769	4.10278e-06
0.00374078	0.00445887	0.00143582	7.73616e-06
0.00262587	0.00183518	0.000957248	4.40432e-06
0.00199946	0.00328063	0.00137784	5.91526e-06
0.00288472	0.00289094	0.00124957	7.33218e-06
0.00420922	0.00205199	0.000467185	5.92175e-06
0.0019558	0.00237733	0.0015705	1.07222e-05
0.00295143	0.00310836	0.000885916	8.37117e-06
0.00202786	0.0026123	0.0011608	1.1761e-05
0.00192937	0.00286687	0.000875196	1.68871e-05
0.00157039	0.00299565	0.00164986	2.76846e-05
0.00201715	0.00473532	0.00150238	1.76233e-05
0.000885578	0.0046031	0.000951455	1.69612e-05
0.00345687	0.00262869	0.000798563	1.51872e-05
0.00391885	0.00399361	0.00159628	1.54482e-05
0.00193946	0.003338	0.00155258	1.66233e-05
0.00283612	0.00316349	0.00106803	1.49366e-05
0.00295554	0.00252822	0.00164433	2.20553e-05
0.00374524	0.00403751	0.00104865	2.5633e-05
0.00171444	0.00284783	0.00194801	1.98735e-05
0.00351102	0.00121176	0.00180553	1.97729e-05
0.00237177	0.00283238	0.00329332	2.38995e-05
0.00310498	0.00302047	0.00180081	2.07404e-05
0.00245655	0.00372459	0.00080651	2.43392e-05
0.00312061	0.00324929	0.00133017	2.61141e-05
0.00400282	0.00385195	0.000999649	2.85947e-05
0.00460165	0.00350477	0.00134019	2.87184e-05
0.00349827	0.00270563	0.000968623	2.91124e-05
0.00239213	0.0043168	0.00139619	2.49995e-05
0.00221602	0.00130046	0.00109511	2.18303e-05
0.00262391	0.00270799	0.000302406	2.76131e-05
0.00190018	0.00208715	0.00122043	2.47837e-05
0.00193543	0.00248557	0.00241118	2.42849e-05
0.000156385	0.00428785	0.00106833	2.90926e-06
0.000213364	0.00467472	0.000948508	5.70013e-06
0.00258682	0.00178314	0.000973541	4.53392e-06
0.00186556	0.00191862	0.000612028	8.18266e-06
0.00216119		0.000486963	7.96941e-06
0.00144746		0.000249968	9.29048e-06
0.00129696		0.000593388	5.02318e-06
0.00111706		0.000382391	8.27371e-06
0.0010611		0.0012212	9.64886e-06
0.00110026		0.00137541	3.35561e-05
0.00182341		0.00133056	2.81321e-05
0.00203579		0.00175471	4.1904e-05
0.00204945		0.00167206	2.83471e-05
0.00300648		0.00133115	2.04391e-05
0.00230942		0.00128545	2.15579e-05
0.00205929		0.000861007	2.20067e-05
0.00324178		0.000641999	1.0649e-05
0.00184001		0.0013228	1.14419e-05
0.00516293		0.000693837
0.00318077		0.00114439
0.00244425		0.0013056
0.00319266		0.0013345
0.00266227		0.00181532
0.00298012		0.00105885
0.00405137		0.00140965
0.00133655		0.0022488
0.00124024		0.000572293
0.00316408		0.00107881
0.00351791		0.000812948
0.00387906		0.000427519
0.00381292		0.00226725
0.00142537		0.00208757
0.00128466		0.00111759
0.00245963		0.00233035
0.00275019		0.00132
0.00255456		0.000736309
0.00275102		0.000826031
0.00253118		0.0011316
0.00210435		0.00108353
0.00284618		0.00190141
0.00298103		0.00174879
0.00252176		0.0013314
0.00284244		0.00118999
0.00209654		0.000922685
0.00264359		0.000657823
0.00303104		0.00158448
0.00143215		0.000912869
0.00276759		0.00209485
0.00243576		0.00169249
0.00180929		0.00208365
0.00330675		0.00132498
0.00253353		0.00125374
0.00120893		0.00180194
0.00130802		0.00202172
0.00322971		0.00110136
0.00211083		0.000722526
0.00220743		0.00122018
0.00277606		0.0014671
0.00328145		0.00159161
0.00444738		0.00116419
0.00224051		0.00129766
0.00458339		0.00133132
0.00322249		0.000999649
0.00183742		0.00117546
0.00209643		0.000567881
0.00151895		0.00133741
		0.000992333
		0.00145515
		0.0013454
		0.000644217
		0.000736836
		0.00122479
		0.00366406
		0.00115001
		0.00112339
		0.000829151
		0.000990609
		0.000657025
		0.00136262
		0.00101878
		0.000711281
		0.000399937
		0.0014124
		0.00106145
		0.000822578
		0.000948264
		0.0002692
		0.00223122
		0.00183744
		0.00140282
		0.00214905
		0.00223227
		0.00154283
		0.00216293
		0.00229389
		0.00148808
		0.00113094
		0.00119769
		0.00078386
		0.000577167
		0.00164703
		0.00171006
		0.00131487
		0.00194274
		0.00124643
		0.000908801
		0.00140154
		0.00104073
		0.00111282
		0.00104702
		0.000436979
		0.000355528
		0.00135177
		0.000986262
		0.0013236
		0.00188417
		0.00113616
		0.00111785
		0.00153671
		0.000791551
		0.00109599
		0.00116702
		0.000877174
		0.00136006
		0.00118566
		0.0021248
		0.0016421
		0.00110043
		0.000723133
		0.00122954
		0.000894985
		0.00160543
		0.00168916
		0.00118933
		0.00138268
		0.00106182
		0.00135022
		0.000717165
		0.000863254
		0.00125322
		0.00140054
		0.00135269
		0.00134985
		0.00108565
		0.00166602
		0.000334929
		0.00102137
		0.000880442
		0.00108018
