# Supplementary material for: WhyD tailors surface polymers to prevent premature bacteriolysis and direct cell elongation in Streptococcus pneumoniae
Source: eLife. 2022 May 20;11:e76392. doi: 10.7554/eLife.76392 (PMC9208761; doi:10.7554/eLife.76392)
Supplement: Figure 4—source data 1. [file elife-76392-fig4-data1.xlsx]

## Sheet: delta lytA
cell area	cell length	cell width		cell area mean:	1.8534		cell area std dev:	0.5034
1.58221	1.84879	0.950041		cell length mean:	2.1572		cell length std dev:	0.4961
2.26339	2.59638	0.952461		cell width mean:	0.9432		cell width std dev:	0.0691
1.51406	1.97787	0.844683
2.02345	2.09474	1.07571
1.83533	1.96374	1.02818
1.65871	1.91938	0.949481
2.45129	2.70472	0.984288
1.90616	2.09838	1.00442
1.76327	2.11391	0.945882
2.27468	2.60376	0.949311
1.75786	1.97869	0.980906
1.84315	2.08054	0.982465
2.28843	2.4133	1.04561
1.13931	1.76242	0.764232
2.38986	2.72293	0.959802
2.35689	2.67633	0.960215
1.85654	2.21901	0.918948
2.25216	2.36189	1.05872
2.01829	2.21063	0.998146
1.62298	1.98501	0.896918
2.21475	2.75948	0.873794
2.15097	2.30097	1.03038
1.73446	1.82834	1.03802
1.8155	1.9617	1.01753
2.64522	2.77467	1.04613
2.38153	2.69055	0.972852
1.54007	1.81158	0.933559
2.64445	2.7729	1.05047
1.22259	1.48976	0.904578
2.13717	2.36346	1.00348
2.6242	2.91728	0.981499
1.76393	1.97005	0.993889
1.61624	1.84291	0.968655
2.0895	2.2677	1.01828
1.81817	2.04503	0.995298
2.43517	2.60649	1.02247
2.63626	2.70088	1.0646
2.05197	2.16361	1.04662
2.17852	2.34155	1.02942
1.90281	2.1235	0.975846
2.57883	2.85576	0.984463
1.90874	2.20488	0.939706
1.64114	1.86562	0.964874
1.605	1.88756	0.941302
1.54058	1.80475	0.931441
1.78446	2.08054	0.951488
2.14332	2.15843	1.09828
1.99495	2.08705	1.06454
2.08283	2.21137	1.04913
1.61446	1.90584	0.927753
1.51046	1.94088	0.845966
2.2036	2.53741	0.949477
2.22821	2.33736	1.05385
2.23746	2.64296	0.930515
1.87244	2.14791	0.964928
2.0295	2.20953	1.01015
1.93914	2.08151	1.03247
2.28252	2.62817	0.950133
1.99413	2.24894	0.97075
1.24745	1.65939	0.832353
2.84727	3.04497	1.02005
2.36281	2.53762	1.01175
1.16368	1.50363	0.844833
2.20467	2.49386	0.975898
2.18372	2.28	1.05698
1.36868	1.60582	0.920606
1.62084	2.16152	0.829098
1.83505	1.96731	1.02716
2.08343	2.31662	0.98607
1.79195	1.99316	0.996994
1.93485	2.14779	0.97602
2.56926	2.70617	1.03133
2.4989	2.61485	1.04788
1.73904	2.21331	0.871988
1.64323	1.91051	0.954848
2.23064	2.48692	0.974666
2.01732	2.26074	0.982112
2.25375	2.43955	1.00137
1.80241	2.24817	0.895397
1.25692	1.69402	0.819067
2.19824	2.18855	1.09344
1.92584	2.29505	0.914425
1.64228	1.90087	0.955953
2.10182	2.27072	1.01711
2.99739	3.13892	1.04758
2.61087	2.69933	1.05078
2.48576	2.64879	1.03034
2.37124	2.5461	1.00522
1.48521	1.79267	0.913009
1.12666	1.61163	0.770911
1.47407	2.03983	0.788882
2.10136	2.42292	0.94354
1.51459	1.94479	0.862964
1.79859	2.03186	0.9816
2.37846	2.52444	1.03472
2.30939	2.40024	1.06223
2.18404	2.5366	0.929483
1.79365	1.91183	1.01655
2.48395	2.80319	0.962254
2.04307	2.26441	0.98558
1.33891	1.84248	0.792964
1.13346	1.5713	0.797807
1.7248	2.24461	0.842315
1.35051	2.04067	0.746388
1.54355	2.01975	0.845283
1.46232	1.74171	0.928644
1.82163	2.02085	1.03662
1.95836	2.10835	1.04218
1.94345	2.08052	1.03993
2.09311	2.3812	0.96924
2.59021	3.1036	0.911269
1.40842	1.77823	0.868161
1.5435	1.77678	0.977797
1.31803	1.51561	0.980288
0.956868	1.31637	0.895986
2.6932	3.25278	0.910669
2.10106	2.28162	1.01843
1.62568	2.09543	0.854931
1.92808	2.34775	0.91985
1.46647	1.81981	0.900368
1.28564	1.64355	0.863426
1.33605	1.59039	0.919505
1.23367	1.52504	0.90281
1.12406	1.48513	0.842434
2.1754	2.48221	0.966366
2.24272	2.87515	0.855089
1.58063	1.91828	0.945373
1.3377	1.84901	0.822949
1.02264	1.33492	0.856933
0.852834	1.31367	0.759641
1.29899	1.57789	0.907232
1.31549	1.6308	0.942164
1.35691	1.64944	0.932319
1.8542	2.16102	0.939872
1.89444	2.19138	0.965785
1.91196	2.32681	0.912646
1.73482	2.02836	0.933392
1.73399	2.01043	0.955091
1.24918	1.7573	0.796387
2.08116	2.60682	0.890711
1.32951	1.66455	0.883357
1.56138	2.07797	0.830965
1.54515	1.99591	0.851405
1.50711	2.02813	0.858834
1.4486	1.85135	0.92069
1.48566	1.88291	0.863706
1.62506	2.00159	0.894978
1.58056	1.96415	0.887643
1.77866	2.11335	0.917078
2.62196	2.80055	1.03018
2.49759	2.67025	1.01015
1.18336	1.60788	0.844573
1.40325	1.72586	0.907822
1.28256	1.68272	0.882324
1.19849	1.43442	0.918707
1.26553	1.53966	0.962647
1.44368	1.67534	0.984507
1.88109	2.21456	0.925394
1.327	1.57627	0.939408
1.37007	1.72242	0.915228
2.03969	2.58588	0.854706
1.92943	2.47667	0.852689
1.74703	2.15892	0.908533
1.33844	1.58762	0.929411
1.29112	1.59502	0.889992
2.43953	2.69945	0.983744
1.9756	2.52352	0.855354
2.5219	2.74773	1.01369
2.5034	2.87008	0.949678
1.84511	2.00418	1.01494
1.60998	1.7659	1.00923
1.48201	1.71456	0.970721
1.28107	1.53423	0.93001
1.64911	1.98639	0.936357
1.84469	2.2289	0.909034
2.23456	2.62134	0.930553
1.64153	2.05942	0.882125
1.39555	1.66057	0.934991
1.85464	2.4292	0.86615
1.55999	2.03091	0.848198
1.31193	1.73603	0.876442
1.48838	1.72043	0.961341
1.57196	1.77514	0.9794
1.33876	1.6638	0.907321
1.29445	1.63242	0.875938
2.58578	3.04765	0.915893
1.43651	1.79239	0.889116
1.65779	1.99929	0.933973
1.59771	1.9336	0.905681
2.86139	3.11527	1.00022
1.4754	1.70878	0.959133
1.65576	1.89563	0.957991
2.77686	3.21194	0.93878
2.97311	3.24841	0.988457
2.87804	3.34449	0.932486
2.09634	2.34389	0.996773
2.01399	2.19215	1.02499
2.18828	2.49904	0.959211
1.83515	2.19226	0.935276
1.36037	1.56811	0.975555
2.03532	2.24717	0.992186
2.21263	2.52955	0.949392
2.43522	2.75061	0.963895
2.45352	2.74713	0.995852
2.42095	2.851	0.925442
1.92021	2.18199	0.97774
1.99128	2.19186	0.999207
1.67607	1.9456	0.946072
2.47368	2.92258	0.92081
2.38312	2.86382	0.910572
2.07639	2.27925	0.998817
2.02322	2.19444	1.01125
2.39936	2.67149	1.00261
1.729	2.0849	0.928168
1.66346	2.29468	0.786256
1.71219	2.08723	0.917326
1.12394	1.54573	0.792288
1.27917	1.47022	0.949246
1.75508	2.03193	0.95656
1.45345	2.12398	0.752639
1.2324	1.69184	0.822338
1.12925	1.44938	0.86699
2.28193	2.93587	0.852472
2.51499	2.83233	0.966337
1.47328	1.75282	0.961876
1.59875	1.89259	0.929865
2.10589	2.4156	0.960916
2.44967	2.68899	0.997416
1.78934	2.06245	0.966142
2.18588	2.64362	0.907746
1.86649	2.04195	1.02176
2.4799	3.01065	0.89598
1.6871	1.88449	0.991955
1.89353	2.05634	1.01326
1.37587	1.72917	0.889028
1.43352	1.693	0.958504
2.7467	3.03811	0.982064
1.42123	1.7222	0.908089
1.70492	1.90344	0.984375
1.85401	2.00756	1.02543
1.65086	1.88754	0.9676
1.40344	1.53514	1.01059
1.14558	1.41683	0.890332
1.24133	1.46232	0.924884
1.62214	1.81934	0.986876
1.69805	1.90683	0.99627
1.95294	2.29761	0.941372
1.27899	1.71179	0.821758
2.51429	2.89809	0.937492
1.56694	1.87245	0.932585
2.00327	2.35189	0.933427
1.37591	1.6368	0.917672
1.4638	1.77297	0.941863
1.31867	1.58519	0.930181
1.18131	1.56619	0.819797
2.81737	3.31654	0.934741
1.40831	1.77954	0.872661
1.35775	1.59592	0.938758
1.09082	1.4279	0.843493
1.00527	1.33772	0.838019
1.87062	2.10862	1.01909
2.0453	2.41743	0.930367
2.53888	2.97929	0.927882
1.43875	1.74827	0.922558
1.71643	2.0264	0.942501
1.35639	1.89057	0.780369
1.58291	1.89291	0.931341
1.08226	1.42351	0.836804
1.8686	2.12545	0.956741
2.47613	2.65505	1.02831
1.58829	1.81758	0.960729
1.44046	1.83017	0.876147
1.65861	2.07445	0.889764
0.906851	1.29964	0.774668
2.73686	2.9073	1.01937
2.20261	2.57985	0.925368
1.5161	1.70714	0.995092
2.87806	2.87154	1.07994
3.06578	3.09702	1.0894
1.54845	1.8764	0.9218
1.53822	1.80936	0.941954
1.26065	1.63514	0.887591
1.28904	1.75863	0.821991
2.04665	2.59512	0.862866
2.09112	2.45458	0.943207
1.87208	2.15805	0.950878
2.18542	2.35342	1.01779
1.6063	1.94538	0.904303
2.32479	2.32411	1.10941
1.87022	1.89666	1.08047
1.58415	1.7835	0.988336
1.52024	1.7563	0.952225
2.68208	2.98271	0.974943
2.57285	2.85578	0.98612
1.70833	1.92841	0.983598
1.87419	2.34859	0.86987
1.57873	2.06166	0.835186
2.07738	2.40875	0.949
2.27145	2.54696	0.985773
1.45198	1.90946	0.865676
1.63109	1.76509	1.02499
1.34788	1.64274	0.906215
2.07402	2.52209	0.892308
2.68997	2.84688	1.03227
2.31311	2.91173	0.860901
1.24338	1.51211	0.917434
1.13911	1.54228	0.853215
1.66396	1.89196	0.975102
1.04396	1.41259	0.831442
2.66009	3.14974	0.912248
1.64948	1.92069	0.938545
2.18153	2.49501	0.981529
1.83696	2.31201	0.885216
1.22312	1.38942	0.968077
1.5674	1.7047	1.01786
1.52508	1.6361	1.02155
1.19087	1.53961	0.865664
1.11092	1.44198	0.861281
1.77298	2.23157	0.878573
1.29701	1.57031	0.925214
2.82851	3.45589	0.917064
1.15727	1.47237	0.884822
1.98089	2.39024	0.91197
1.35924	1.59491	0.95755
1.36685	1.48098	1.01381
2.62688	2.8834	0.981632
2.90185	3.17831	0.992604
1.73306	2.06015	0.927062
2.11341	2.44992	0.950193
1.60888	1.94779	0.924689
1.52287	1.77851	0.95049
1.32791	1.51197	0.985763
2.67598	2.98136	0.993479
1.08782	1.38438	0.861764
1.17535	1.51309	0.868658
1.95455	2.06691	1.05988
2.41079	2.82703	0.927247
2.027	2.1727	1.02712
2.19978	2.47588	0.992111
2.45461	2.99511	0.891867
1.56185	1.71914	0.994951
1.55216	1.80962	0.943769
1.57831	1.89298	0.915735
2.42752	2.82529	0.940195
2.3496	2.78901	0.919139
1.50756	1.76703	0.966113
1.69624	2.14271	0.883242
1.78857	2.27611	0.880285
1.45988	1.79002	0.912648
1.43325	1.80673	0.894517
1.17435	1.53958	0.842117
1.58716	2.16597	0.817713
1.68052	2.00983	0.924824
1.48443	1.75161	0.954037
1.679	1.91749	0.9674
1.68763	2.171	0.842026
1.62962	1.97913	0.914175
1.37909	1.90448	0.800158
2.08754	2.37279	0.964674
1.48791	1.63379	0.998718
1.19886	1.38173	0.950081
2.08098	2.63481	0.86855
1.89575	2.17389	0.982189
2.02015	2.14764	1.05629
1.59627	2.09124	0.839737
1.72271	1.88167	1.02376
2.22949	2.47435	0.998591
2.00913	2.63108	0.831282
1.63391	2.2314	0.822926
1.96747	2.22715	1.00763
2.96687	3.54731	0.919771
2.69148	2.89891	1.00521
1.4401	1.82723	0.880318
2.58867	3.10179	0.921652
1.36174	1.75261	0.907396
1.46827	1.7849	0.922525
2.9292	3.03236	1.06571
1.80064	1.89309	1.04461
1.04469	1.36912	0.844822
0.955466	1.51845	0.761038
0.959835	1.26443	0.844649
1.55578	1.84126	0.946979
1.71208	2.04539	0.935073
2.03175	2.33653	0.961721
2.42878	2.5184	1.06797
1.63261	1.83814	0.983748
1.4662	1.79405	0.939695
1.89988	2.29181	0.928274
2.17676	2.51162	0.938561
2.47799	2.90597	0.935275
2.37188	2.67334	0.988212
1.84386	2.08941	0.983234
2.18762	2.48178	0.988943
2.43979	3.01289	0.882495
1.77593	2.13512	0.919948
1.68469	2.11162	0.897731
2.2713	2.83724	0.875224
1.13348	1.44502	0.883817
1.01161	1.33472	0.837126
1.72164	1.96991	0.988827
1.70461	2.07827	0.903339
1.73604	1.95635	1.00001
1.21768	1.45207	0.947521
1.16595	1.58571	0.835186
1.65733	2.10336	0.888626
1.81937	2.23056	0.902432
2.11864	2.35538	1.00191
2.07861	2.41321	0.956295
2.23361	2.67162	0.929101
1.44793	1.74375	0.938968
1.81751	2.2231	0.90172
1.75601	2.06184	0.949088
1.55494	1.95439	0.877242
1.99603	2.12334	1.04638
1.75181	1.97137	0.988494
2.31294	2.7116	0.94606
2.73035	2.75237	1.08026
1.42351	1.71058	0.935572
1.98113	2.29965	0.945685
3.40857	3.65774	1.02203
1.88616	2.52458	0.815505
1.70153	1.84339	1.00793
1.69749	2.02871	0.914528
1.74406	2.00887	0.961572
2.379	2.83441	0.924397
1.52009	1.77577	0.947539
1.44192	1.69864	0.962395
1.08984	1.46088	0.840637
1.36963	1.65308	0.920941
1.3228	1.58623	0.934168
1.29543	1.59767	0.895814
1.58664	1.72803	1.02047
1.34607	1.70247	0.896007
1.35823	1.68877	0.910001
1.27367	1.57456	0.888518
1.37287	1.62557	0.922887
1.68577	1.89757	0.985348
2.32872	2.56853	0.987283
2.11292	2.58369	0.895144
1.55306	1.80704	0.963007
1.40314	1.65749	0.947312
2.75851	3.23437	0.932112
1.32681	1.64347	0.903652
2.25676	2.73189	0.906501
2.48682	2.83836	0.957915
1.54255	1.78468	0.945438
1.26989	1.45225	0.964012
1.23611	1.51028	0.906954
1.04169	1.37269	0.842646
1.6404	1.89452	0.948041
1.36654	1.63677	0.927468
1.59475	1.88792	0.953471
1.58885	1.80674	0.976732
1.3068	1.63282	0.888458
1.85476	2.03899	1.02407
1.71567	1.96878	0.982987
1.71014	1.93545	0.980967
1.86475	2.1259	1.01039
1.95467	2.1922	0.990714
2.06585	2.22682	1.03561
1.72231	1.98565	0.974919
1.84197	2.05223	1.00068
1.24292	1.52075	0.925508
1.49317	1.86422	0.909682
1.69748	1.84684	1.01224
1.77925	1.94161	1.02043
1.91097	2.15277	0.992909
1.44433	1.73874	0.929988
2.47089	2.77145	0.977523
2.08251	2.36829	0.973227
1.90181	2.11598	0.990492
1.98601	2.22952	0.982872
1.61675	1.88335	0.957488
1.57504	1.83962	0.948904
1.82711	2.01592	1.01201
2.14242	2.35315	1.01223
2.05006	2.29826	0.972804
2.01012	2.20226	0.994107
2.66647	2.9458	0.987639
1.23007	1.85627	0.732724
1.76599	2.19913	0.872182
1.94023	2.19453	0.963695
1.90528	2.24261	0.96725
1.96427	2.12041	1.02418
2.20501	2.34529	1.02469
2.53476	2.76109	1.00178
1.98678	2.34226	0.947518
1.8778	2.29189	0.896644
1.2503	1.74383	0.80734
1.41371	1.93443	0.789605
1.49357	1.82263	0.90527
2.14611	2.47488	0.942951
1.61047	1.90191	0.93828
2.64815	2.79428	1.03875
1.84798	1.94909	1.04271
1.94126	2.19191	0.964812
2.03304	2.33567	0.947866
1.77463	2.15377	0.907814
2.07582	2.51481	0.906166
1.54717	1.97911	0.858781
2.36064	2.53281	1.01886
2.16804	2.44465	0.966347
2.02977	2.40294	0.917985
1.62725	2.05787	0.86569
1.94613	2.03407	1.06802
1.50697	2.02052	0.833051
1.91179	2.26719	0.915593
1.52406	1.92603	0.854602
1.98583	2.41328	0.896128
1.89946	2.23549	0.921194
1.47608	1.96945	0.822375
2.05433	2.24988	0.99574
2.00267	2.34022	0.937734
2.47259	2.71028	0.992438
1.57534	1.82791	0.953267
2.59369	2.74494	1.04627
2.14473	2.34735	1.00825
2.26516	2.67201	0.927226
2.60733	2.77653	1.03139
1.11376	1.51808	0.841797
1.43205	1.75009	0.925705
2.20216	2.41972	0.997648
2.22873	2.53795	0.945095
1.82643	1.96134	1.0282
2.10239	2.33409	1.00023
2.45008	2.78579	0.958152
1.54895	1.70982	1.00474
1.3617	1.7124	0.886436
1.36252	1.69277	0.911403
2.19041	2.33476	1.03753
2.37835	2.58684	1.00722
1.96639	2.0765	1.04011
2.23525	2.80998	0.910017
2.13332	2.42498	0.963304
2.83788	2.99727	1.03457
2.02247	2.2002	1.01131
2.90021	2.83476	1.12466
3.1944	3.14658	1.10552
2.01527	2.39441	0.923471
1.71512	2.04196	0.929375
2.33687	2.5092	1.01015
2.41231	2.44746	1.07774
1.42669	2.01033	0.780114
2.11811	2.33425	0.995674
1.94124	2.28508	0.933038
1.56774	1.83326	0.942838
2.02252	2.18458	1.02103
0.889003	1.23395	0.780128
1.82545	2.16607	0.916952
1.63956	2.01889	0.893659
2.40609	2.58511	1.01544
1.78899	1.99658	0.981229
3.26103	3.53895	1.00866
1.73647	2.00541	0.95477
1.57914	1.80394	0.965598
2.08071	2.27091	1.00302
1.64299	2.23036	0.839918
1.60767	1.89934	0.93441
1.19281	1.64147	0.840987
1.63575	2.07284	0.862536
1.21371	1.653	0.826763
2.26176	2.52125	0.976505
1.98213	2.15292	1.0164
1.15819	1.48822	0.85572
2.24747	2.59944	0.947547
1.27672	1.65355	0.839265
0.97029	1.35663	0.808236
2.0131	2.33345	0.945795
2.54712	2.73842	1.01393
1.27588	1.59968	0.86032
1.97711	2.14501	1.01709
1.75001	2.0561	0.938112
1.41764	1.82051	0.847742
2.50666	2.65257	1.0349
2.31712	2.43535	1.04695
1.86245	1.95851	1.04024
1.50959	1.79466	0.941937
2.37286	2.4478	1.06445
1.27188	1.52172	0.935592
1.36511	1.72872	0.892078
1.79956	2.24245	0.872868
1.26234	1.60632	0.850914
1.1566	1.80583	0.721554
1.53322	2.05915	0.83106
1.53373	2.08819	0.810532
1.42814	1.86905	0.87516
1.41761	1.77532	0.922247
1.38026	1.74681	0.890544
1.64343	1.89042	0.968472
1.09899	1.54109	0.835183
1.07116	1.36905	0.864216
0.949698	1.18277	0.87099
2.1467	2.32099	1.03201
1.4795	1.83238	0.896443
2.30891	2.33382	1.08843
1.9183	2.33503	0.901188
1.62549	1.88848	0.958105
1.22838	1.61465	0.852683
1.69411	1.88201	1.00153
1.46352	1.69724	0.946724
1.08232	1.53468	0.805108
1.39967	1.71928	0.937624
1.59886	2.04048	0.895829
1.8503	2.05862	1.01718
1.23078	1.76253	0.763645
1.54592	1.93577	0.875556
2.79583	3.16039	0.966417
2.33834	2.5379	1.01569
1.88658	2.03958	1.02214
2.10097	2.583	0.901569
2.92459	3.31099	0.971829
1.86974	2.1416	1.00879
1.71702	2.03587	0.938379
1.59387	1.89003	0.933943
1.31746	1.76301	0.828383
1.69229	2.10333	0.888218
1.90639	2.2564	0.96864
2.46674	2.59905	1.04013
1.7568	2.18833	0.874915
2.04957	2.2687	0.973975
2.25793	2.58405	0.954328
1.6641	2.18212	0.841787
2.85392	3.41998	0.908418
1.81741	2.27253	0.89068
1.26109	1.57716	0.895988
1.9991	2.2123	0.990862
2.22005	2.71705	0.896128
1.24973	1.73812	0.842369
1.34618	1.88459	0.800969
2.56746	2.93741	0.990425
1.65267	2.07805	0.886565
1.40871	1.78856	0.927818
2.11914	2.39068	0.989141
1.81371	2.47813	0.799023
2.28118	2.61587	0.949585
2.41062	2.76418	0.964612
1.52946	1.83567	0.927978
1.63964	2.00902	0.911834
1.41537	1.65058	0.932294
1.31177	1.72324	0.86618
2.45189	2.72059	0.974921
2.72291	2.99895	0.985526
1.62705	1.92389	0.927545
1.48998	2.0675	0.796387
2.33256	2.73118	0.932129
2.01889	2.34209	0.970498
1.80156	2.23832	0.884919
2.36667	2.71924	0.962713
2.3965	2.53102	1.03111
1.96183	2.51949	0.84803
1.29089	1.66361	0.87205
1.75981	2.10934	0.933339
1.87123	2.03532	1.03104
1.44098	1.76601	0.885488
1.73003	2.07533	0.917906
2.25969	2.66328	0.929373
1.25266	1.47288	0.933762
2.09196	2.47065	0.931092
1.26751	1.51572	0.923544
1.20328	1.40498	0.948836
1.70694	1.90862	1.01366
1.83469	2.15465	0.94217
2.09364	2.52422	0.900977
1.99939	2.22386	0.999372
1.07708	1.31176	0.890383
1.45288	1.75689	0.936602
2.6605	3.11157	0.932948
0.954009	1.35896	0.82311
1.40962	1.74908	0.910509
0.938065	1.36755	0.770979
1.36624	1.64889	0.915247
2.0996	2.16029	1.06511
1.61284	1.84762	0.959904
3.34894	3.38604	1.07043
1.90641	2.3703	0.88242
1.29984	1.72159	0.864762
2.9231	3.16395	1.00019
2.32174	2.57647	1.01021
1.33668	1.70691	0.876821
1.05031	1.36604	0.85945
2.25488	2.59007	0.943176
1.63451	2.1483	0.842554
2.66908	3.03589	0.951779
1.61167	2.12584	0.83001
3.11207	3.48788	0.967259
1.94506	2.1428	1.00479
2.80703	3.05166	0.993619
2.02892	2.22143	1.00989
1.90925	2.19364	0.975883
1.52093	1.94252	0.858876
1.69572	2.28154	0.801551
1.76981	2.24703	0.865918
2.56168	2.85587	0.986101
2.34095	2.61465	0.988989
1.58161	1.77721	0.994866
1.47427	1.74925	0.934975
1.55442	1.94812	0.877524
3.04955	3.18984	1.04213
2.77218	3.4423	0.864129
2.9653	3.28295	0.982949
2.92408	3.32156	0.953012
1.85231	2.03419	1.02184
1.88975	2.26497	0.910301
1.1735	1.48698	0.880717
3.1435	3.41161	1.00778
1.39831	1.81963	0.866002
1.55478	1.88712	0.934169
1.44581	1.81965	0.872745
2.45235	2.90782	0.914149
0.907276	1.31428	0.757626
1.50772	1.91299	0.865283
2.39159	2.75369	0.950728
2.51263	2.83461	0.965826
1.86834	2.03701	1.0199
1.64002	1.86032	0.970734
1.94205	2.21814	0.977801
1.87336	2.1797	0.952994
1.79529	1.99909	0.972677
1.80022	2.07907	0.948117
2.87472	2.99916	1.07483
1.84986	1.93788	1.06288
2.98124	3.41279	0.957424
1.13443	1.51752	0.838069
2.2627	2.6731	0.931929
2.3952	2.73548	0.963772
2.07869	2.19158	1.06655
3.72341	3.73518	1.07722
1.33113	1.55722	0.929632
2.23248	2.57277	0.942588
1.5257	1.74308	0.970176
1.57217	1.84363	0.957538
1.30524	1.68842	0.856162
1.28611	1.58162	0.895611
2.84842	3.14005	0.981385
1.75354	2.09452	0.928761
2.56885	3.04604	0.91771
1.33762	1.8737	0.783212
1.3943	1.61123	0.943895
1.63879	1.90925	0.953298
1.84176	2.04117	1.00046
1.64403	1.84125	0.981806
1.752	1.965	0.977988
2.10304	2.27225	1.01548
1.95218	2.18168	0.984552
0.961697	1.30057	0.809048
0.994187	1.44949	0.839023
2.9238	3.18865	0.996447
1.73614	1.81764	1.06075
1.54742	1.73479	1.00327
1.31648	1.81779	0.802475
2.38028	3.04292	0.846397
1.31107	1.64045	0.884442
3.00132	3.30623	0.993046
2.43284	2.77466	0.956044
2.74749	3.0915	0.97607
1.59232	1.80285	0.983807
1.62465	1.79463	1.00873
2.11866	2.51437	0.927778
2.0133	2.24348	0.989842
1.67863	2.06298	0.904378
2.56894	2.92167	0.949447
1.36353	1.63599	0.929729
1.77962	1.90493	1.04415
3.10111	3.51711	0.965067
1.98185	2.49247	0.8608
2.34333	2.70688	0.946435
2.11776	2.319	1.02543
1.95343	2.19009	0.981095
1.99084	2.10303	1.04928
1.49794	1.80935	0.939754
1.87683	2.31249	0.907515
2.10644	2.55489	0.893981
1.55888	1.95932	0.877104
1.38458	1.62196	0.931108
1.61918	1.86859	0.964003
1.23199	1.71577	0.815926
2.04137	2.19249	1.04418
2.16487	2.29233	1.06625
2.60925	3.21079	0.883489
3.36715	3.5636	1.02895
1.86956	1.97239	1.04291
1.20577	1.67029	0.840075
1.75985	2.00969	1.00811
1.92275	2.39134	0.874992
1.6814	2.09949	0.90619
1.73048	2.01559	0.957417
2.43071	2.81271	0.943046
1.47824	1.88379	0.887209
1.33268	1.65471	0.93308
1.48084	1.76303	0.950604
2.28461	2.72285	0.914062
1.49763	1.89631	0.893255
1.36285	1.70156	0.902133
1.8005	2.25625	0.91199
2.47194	2.6597	1.01785
2.89575	3.18078	0.997097
1.88056	2.13024	0.974535
1.80448	2.13838	0.944481
1.95027	2.20676	0.977717
1.25932	1.67404	0.822693
1.90199	2.47665	0.889639
2.18985	2.40391	1.00812
1.52206	1.81377	0.955899
1.65803	2.10105	0.886875
1.65013	2.07023	0.869694
1.26453	1.74924	0.805205
1.29078	1.76636	0.807614
1.81784	2.20535	0.912814
1.37568	1.60025	0.97834
1.18104	1.45391	0.920624
1.96885	2.35039	0.95158
2.62456	2.97434	0.971384
2.21171	2.73226	0.903883
2.85698	3.32728	0.962401
1.65863	1.77438	1.04099
1.38935	1.69289	0.923074
2.26233	2.39706	1.04203
1.54616	1.82284	0.96978
1.46817	1.71369	0.969245
1.915	2.4313	0.871185
1.53622	2.02744	0.858658
1.41505	1.92035	0.809039
1.85956	2.07006	1.00737
1.01265	1.35064	0.825891
0.959116	1.2993	0.80576
1.1184	1.3582	0.907044
2.56312	2.97054	0.946448
1.36063	1.71619	0.896606
1.72799	2.06972	0.920431
1.76983	2.10592	0.947801
2.37208	2.68306	0.960944
3.00791	3.57516	0.938745
2.19464	2.51792	0.960186
2.2278	2.57866	0.939592
2.72138	2.85275	1.04766
2.4137	2.5607	1.03513
3.03021	3.14806	1.02467
1.42502	1.70979	0.924853
2.62693	3.02613	0.949955
2.64431	2.92352	0.996034
2.12705	2.40927	0.975685
1.9236	2.11221	1.0085
2.15105	2.37304	1.00815
2.1689	2.52858	0.940917
2.88119	3.26282	0.954626
1.95648	2.21523	0.98503
2.88889	3.2726	0.973919
1.19684	1.42546	0.921033
1.74529	2.12983	0.909504
2.3559	2.8039	0.922603
1.56624	1.77964	0.993445
2.88398	3.20218	0.988744
2.03936	2.13697	1.06324
2.12297	2.24982	1.03997
1.67198	2.00728	0.939615
1.66711	2.07101	0.902978
2.20592	2.50725	0.959291
2.00786	2.19632	1.0002
2.58906	2.91534	0.971919
2.4685	2.86363	0.949059
2.2039	2.52089	0.964908
1.06943	1.38106	0.864294
2.40303	2.51338	1.05338
2.23019	2.34613	1.04394
2.49503	2.76334	0.991862
2.27312	2.717	0.92156
2.36348	2.46884	1.06236
2.02982	2.36909	0.953624
1.47749	1.97117	0.847605
2.31847	2.79679	0.915813
1.33567	1.67384	0.885196
1.34104	1.70494	0.905331
1.55098	1.79031	0.962331
1.64635	1.85406	0.972761
1.21316	1.52745	0.87577
1.59335	1.82241	0.949936
1.56886	1.75217	1.00913
1.51883	1.72197	0.997909
1.53823	1.77531	0.960327
1.89189	2.09769	1.02047
1.64946	1.94324	0.940493
1.68243	1.89375	0.992671
1.8174	2.09026	0.977435
1.79211	2.01654	1.01088
1.37363	1.63104	0.946975
1.21308	1.52856	0.881902
1.46602	1.81335	0.899786
1.37557	1.78175	0.876593
0.969953	1.26583	0.846206
1.23779	1.67784	0.83943
1.33156	1.61321	0.89773
1.2235	1.57971	0.868483
1.44159	1.71416	0.951657
1.66343	1.91405	0.954645
1.50749	1.85326	0.917545
2.37961	2.65691	0.986359
1.29958	1.55359	0.923332
1.71619	1.94029	0.972584
1.56443	1.75693	0.982358
1.32035	1.77855	0.826064
1.24824	1.61905	0.853785
1.36671	1.58831	0.948153
2.29658	2.6304	0.952397
1.75309	1.97231	0.971489
1.76492	1.88528	1.0344
1.66709	1.84316	1.00665
2.28712	2.42428	1.04071
2.06724	2.35809	0.971936
2.29574	2.4481	1.02381
3.03831	3.09753	1.0696
1.92931	2.21929	0.95415
2.04074	2.41751	0.924806
2.48115	2.60393	1.04422
2.31113	2.65065	0.952286
2.40183	2.49387	1.05805
2.27656	2.551	0.96734
1.84973	2.12652	0.95822
2.12933	2.40224	0.964032
2.61316	2.85898	0.983292
1.51408	1.75948	0.959794
1.94622	2.0918	1.032
1.72159	1.99914	0.95203
2.24243	2.38288	1.03703
1.87281	1.99977	1.02971
1.8395	2.08742	0.981996
2.09954	2.22098	1.02742
2.67075	2.85435	1.01956
2.32479	2.66317	0.960738
1.25075	1.56823	0.87309
1.97608	2.32874	0.934526
2.11342	2.26417	1.02428
2.16237	2.29554	1.0399
2.53261	2.85466	0.968547
1.86024	2.13352	0.950804
2.25111	2.52048	0.978808
2.3177	2.55057	1.00039
2.57558	2.74532	1.03044
1.28799	1.85294	0.765334
1.90105	2.07521	1.01248
2.75425	2.83343	1.06266
1.73597	1.87851	1.02517
1.24323	1.5547	0.873528
2.03609	2.16661	1.03444
1.60746	1.76083	1.01958
1.80164	1.97487	1.01352
1.85304	2.28511	0.888664
1.57104	1.9343	0.893328
1.82935	1.97897	1.01738
2.2199	2.58029	0.939309
1.45282	1.70736	0.957502
2.35464	2.64534	0.972323
2.17912	2.51119	0.954513
1.36994	1.77105	0.857458
1.39661	1.83799	0.835229
1.21054	1.58471	0.840236
1.29119	1.5652	0.903602
2.37864	2.51692	1.03831
1.69996	1.90148	0.983678
2.11447	2.41815	0.961043
1.60828	2.00915	0.885875
0.897125	1.36108	0.748488
1.23645	1.63228	0.84439
1.97513	2.23097	0.980331
2.26829	2.65094	0.936933
2.46097	2.77318	0.961215
1.80496	2.15889	0.925776
2.56522	2.63678	1.06732
1.91222	2.08844	1.02462
1.51968	1.80773	0.94139
1.19001	1.61617	0.817227
2.84877	3.30846	0.943893
1.27506	1.58376	0.895824
1.23499	1.45737	0.944454
1.45189	1.5901	1.01731
1.62096	1.81916	1.04492
1.2365	1.73394	0.817502
2.07435	2.35378	0.980397
1.8355	2.08347	0.969776
1.88841	2.21168	0.948888
1.64954	1.87905	0.975303
1.02967	1.48936	0.754205
1.42658	1.94665	0.829726
1.4661	1.61665	0.978435
2.26947	2.44989	1.02869
2.35376	2.61469	0.98607
1.54734	1.76227	0.98918
1.2827	1.61239	0.894482
1.1382	1.5843	0.794497
1.58247	2.06539	0.847468
1.36416	1.71769	0.858109
1.81183	2.24877	0.881341
1.56038	2.031	0.847306
3.09834	3.38152	1.00214
1.78797	2.07065	0.934862
2.87609	3.26493	0.96603
3.01922	3.30439	1.00995
1.52445	1.74739	0.976076
3.08196	3.20864	1.04327
3.75275	3.81514	1.07456
1.55991	1.8099	0.949858
1.47545	1.69119	0.965598
2.12814	2.17124	1.08636
1.39853	1.70004	0.917127
2.98701	3.18201	1.01064
2.34138	2.54425	1.01892
1.83601	2.03211	0.993041
2.82975	3.21431	0.956045
2.04911	2.19943	1.02921
1.92502	2.14433	0.991889
1.42428	1.61094	0.961494
1.99884	2.14639	1.02202
1.19827	1.50479	0.894643
1.41644	1.86773	0.883497
1.31083	1.69744	0.849009
1.7385	1.86478	1.02507
1.71766	1.91756	1.02593
2.85544	3.01494	1.03782
2.64639	2.91753	0.99646
1.92129	2.22725	0.944323
1.75001	1.95633	0.987147
2.19869	2.25176	1.07529
2.03991	2.20985	1.00035
1.64883	1.92842	0.943746
1.63138	1.99019	0.929822
1.86935	2.48105	0.82057
2.07569	2.26244	1.01557
2.07357	2.23225	1.03289
2.29652	2.71946	0.944393
2.08021	2.69623	0.838821
2.07372	2.24086	1.01672
2.26888	2.48996	1.00161
2.4131	2.72198	0.975441
2.0061	2.34512	0.956225
1.75475	2.2181	0.872489
3.0174	3.4247	0.95954
2.69455	3.01862	0.971586
2.52534	2.60289	1.07138
2.89263	3.06861	1.03827
2.29779	2.6621	0.940599
2.15933	2.40451	0.99823
2.27693	2.43485	1.02277
1.22639	1.44627	0.939084
1.12761	1.35902	0.91821
2.41818	2.71537	0.968667
1.91702	2.33829	0.902321
2.20954	2.6104	0.93578
2.33369	2.48087	1.04582
3.57072	3.69296	1.05076
3.48701	3.73806	1.02122
1.77684	2.14392	0.919911
1.73023	2.21849	0.870659
2.49564	2.8313	0.958493
2.18041	2.65998	0.89006
2.18742	2.53432	0.925613
2.12999	2.29009	1.01563
1.23603	1.6347	0.841729
1.90436	2.23398	0.932505
2.12607	2.4926	0.933254
2.03776	2.65952	0.837309
2.38669	2.64116	0.986581
1.73519	2.07945	0.917372
1.51517	1.61493	1.03437
2.01666	2.06505	1.07677
1.90937	2.02538	1.04271
1.4013	1.59596	0.975796
1.53269	1.75445	0.969828
1.53814	1.77503	0.958166
1.77893	1.99795	0.995019
1.9829	2.27509	0.958208
2.87105	3.13357	1.00451
2.12975	2.39463	0.97902
2.77641	3.0339	0.996228
2.98958	3.14484	1.04244
1.17813	1.49155	0.866055
1.71101	1.96965	0.9602
1.71399	1.86065	1.02258
2.71798	3.32879	0.89504
1.74864	2.04576	0.946852
1.4622	1.75601	0.910214
1.14201	1.57845	0.814189
1.85536	2.22994	0.923427
1.79005	2.26316	0.862329
1.83249	1.97861	1.03249
1.37426	1.74771	0.880774
1.75545	2.34284	0.839308
1.59001	2.03622	0.871092
1.8039	2.13105	0.920314
2.62672	3.06355	0.926878
2.23148	2.67267	0.911619
0.900337	1.24484	0.822406
0.795116	1.10231	0.790305
1.65971	1.90349	0.968212
1.58929	1.95517	0.909919
1.47492	1.70309	0.982837
1.52721	1.88821	0.906262
1.38126	1.70988	0.905603
1.64514	1.9409	0.94946
2.43795	2.62651	1.01751
1.52873	1.69989	0.999687
2.01612	2.52449	0.877065
2.22111	2.71312	0.901126
1.35616	1.56938	0.954319
1.63675	1.93979	0.941745
1.68592	1.95848	0.953102
1.94741	2.23375	0.957241
3.49312	3.73069	1.02392
1.83337	2.15054	0.947881
1.89752	2.14278	0.989684
1.73414	2.01492	0.969446
3.19775	3.87894	0.898963
2.0128	2.23991	0.985969
1.56557	1.85147	0.966264
2.27416	2.603	0.955407
2.48117	2.70922	0.997459
1.71307	2.00252	0.950113
1.40668	1.78571	0.880711
1.32508	1.71286	0.888729
1.65393	2.00889	0.91826
2.02206	2.21149	1.01814
2.12403	2.37132	1.02323
2.20495	2.48622	0.979312
2.00706	2.15438	1.02663
1.6219	1.97296	0.902607
2.02172	2.37887	0.939147
2.60527	2.97586	0.963056
1.54275	1.90993	0.871211
1.2999	1.61723	0.899747
1.4291	1.64168	0.975788
1.44349	1.72037	0.960171
1.50901	1.78049	0.957311
1.19673	1.50172	0.901425
1.14074	1.50109	0.854907
0.990282	1.34158	0.826358
1.0322	1.31695	0.848181
1.09414	1.43285	0.851816
1.02553	1.40458	0.838898
1.79313	2.15938	0.924228
1.60649	1.92966	0.916907
1.33113	1.61027	0.918343
1.38296	1.69761	0.914011
1.84089	2.02507	1.00496
1.71197	1.94404	0.977407
1.77755	1.96596	1.00759
1.54156	1.75945	0.977331
1.5459	1.78445	0.974302
1.83141	2.00394	1.04368
1.63831	1.66216	1.09696
1.56653	1.76191	0.996507
1.38043	1.61347	0.941623
1.68873	2.03021	0.939089
0.970143	1.34666	0.792406
0.95286	1.38195	0.770433
1.75614	2.01047	0.960266
1.57212	1.8101	0.951944
1.89699	2.08012	1.02842
1.761	1.88308	1.03684
1.32869	1.7226	0.840881
1.2809	1.61506	0.877976
1.27266	1.52513	0.949443
1.3353	1.72593	0.879658
1.3964	1.71394	0.919468
1.31669	1.63146	0.893166
1.5567	1.82399	0.952381
1.59955	1.76698	1.00355

## Sheet: delta tacL
cell area	cell length	cell width		cell area mean:	2.7647		cell area std dev:	0.8423
2.85622	2.97951	1.05172		cell length mean:	2.8232		cell length std dev:	0.7755
2.19127	2.35181	1.05048		cell width mean:	1.0769		cell width std dev:	0.0787
3.02451	2.89682	1.14927
2.91061	2.78642	1.15608
3.62131	3.48437	1.13696		[h,p] = ttest2(cArea_deltalytA, cArea_deltatacL, 'Vartype', 'unequal')
2.83593	2.96375	1.05724		h = 1 (rejects null hypothesis)
2.83083	3.0638	1.00482		p = 2.0160e-66
3.21234	3.30868	1.0656
3.00639	2.97596	1.11586		[h,p] = ttest2(cLng_deltalytA, cLng_deltatacL, 'Vartype', 'unequal')
3.19038	3.41139	1.05279		h = 1 (rejects null hypothesis)
3.32771	3.48066	1.06008		p = 1.7236e-46
3.65265	3.60479	1.11675
1.75632	1.70733	1.14571		[h,p] = ttest2(cWidth_deltalytA, cWidth_deltatacL, 'Vartype', 'unequal')
2.09992	2.41905	0.95168		h = 1 (rejects null hypothesis)
4.00636	3.82067	1.14516		p = 1.7329e-121
3.23386	2.98327	1.20356
2.25193	2.57952	0.953194
2.89222	2.66574	1.19607
2.93072	2.98481	1.099
3.2142	3.41919	1.01969
2.43074	2.55376	1.05002
2.69964	2.9048	1.01859
1.40793	1.54034	1.01196
1.68265	1.93244	0.942729
2.59229	2.80172	1.02839
4.02335	3.85664	1.13567
4.48864	4.03692	1.21413
2.3793	2.40269	1.09354
2.81312	2.7898	1.10627
3.63035	3.51082	1.12538
3.46054	3.59871	1.05448
2.52111	2.61437	1.08095
3.76791	3.79077	1.0769
3.40506	3.29393	1.1413
1.43346	1.67336	0.964252
3.02783	2.90886	1.14044
3.05654	2.83509	1.17419
2.27096	2.46734	1.03871
2.83666	3.02352	1.01566
1.49975	1.65124	0.992027
2.81627	2.70859	1.17289
1.98372	1.9292	1.10718
4.82219	4.71949	1.09655
4.3375	4.05023	1.17468
2.09193	2.14216	1.09334
2.1372	2.42154	0.978947
3.90465	4.14161	1.0254
2.23919	2.22382	1.11212
2.27558	2.35071	1.08573
2.64886	2.46779	1.18251
2.71009	2.59659	1.14758
3.23319	3.31913	1.06551
2.96724	2.93399	1.11293
3.11463	3.19898	1.06084
3.15149	3.33113	1.0193
1.81774	1.99779	1.00014
2.23047	2.11948	1.1662
1.83999	1.87986	1.0913
6.21066	6.0159	1.12759
3.04992	3.02499	1.11247
1.80575	1.91492	1.0453
1.81735	1.9122	1.04634
4.01783	4.07249	1.0735
2.38095	2.43855	1.07394
2.40659	2.36738	1.12608
2.03663	2.08125	1.08532
1.76796	1.92371	1.00842
1.89478	1.96076	1.06132
2.22303	2.15274	1.12184
2.10887	2.17455	1.08769
1.89841	2.05962	1.07913
2.26801	2.27289	1.13697
2.72351	2.92347	1.00471
2.52411	2.56891	1.0863
3.04265	3.05218	1.10032
2.38887	2.31975	1.1445
2.67695	2.47715	1.19358
4.55566	4.55873	1.10113
1.75297	1.90028	1.01746
1.62757	1.86054	0.964086
1.84187	2.02392	1.0121
3.2046	3.30877	1.05503
3.01074	3.04583	1.08964
3.10172	3.10844	1.10346
2.40091	2.50505	1.07125
2.96179	2.64515	1.24777
2.68816	2.55495	1.1466
2.23062	2.26268	1.09243
2.66566	2.55924	1.14247
3.27177	3.41678	1.03559
2.83503	2.99118	1.03067
2.29856	2.53675	1.00575
3.67193	4.43073	0.897324
2.26211	2.31431	1.08174
3.438	3.28162	1.14928
1.94423	1.98973	1.08832
3.09123	2.95368	1.18626
1.69207	1.76712	1.05872
1.64066	1.81886	1.00327
3.68242	3.99134	1.03444
2.67923	2.69977	1.09911
2.92362	3.28932	0.984946
2.3394	2.76535	0.95638
2.66838	2.71763	1.10751
2.88756	2.92275	1.07697
2.76962	3.07834	0.993752
1.89965	2.3064	0.91921
2.19292	2.16795	1.11145
2.06456	2.03224	1.119
1.90369	2.01775	1.03515
2.17336	2.25542	1.05394
1.90584	2.03999	1.05069
1.70513	1.89045	1.00577
1.76139	2.06173	0.94623
1.42312	1.84334	0.859961
3.4197	3.61349	1.01998
3.69414	3.79835	1.06418
1.5403	1.80729	0.9553
2.30464	2.3468	1.08615
2.46747	2.33968	1.16395
2.55752	2.65406	1.08959
2.06666	2.63562	0.861497
2.57435	2.90549	0.972639
3.11791	3.18725	1.07595
4.63338	4.64789	1.09443
3.63713	3.45781	1.16885
1.50696	1.629	1.02093
2.79015	2.95135	1.04567
2.63403	3.08573	0.94783
1.27335	1.57129	0.891263
1.68776	2.00769	1.0022
2.15722	2.26314	1.0453
2.08807	2.07589	1.11048
2.30221	2.32685	1.10426
1.92952	1.93949	1.08674
3.6419	3.67268	1.10832
2.50751	2.65555	1.06408
1.85488	2.14311	0.974114
3.34423	3.15987	1.16122
2.42677	2.45787	1.09593
4.95686	4.60434	1.16935
4.11066	4.04377	1.11557
4.03383	4.06151	1.07195
2.06181	2.031	1.12752
1.86426	1.91125	1.09148
2.77909	2.83524	1.07966
2.55969	2.82545	1.00934
3.44789	3.67928	1.04752
3.99117	3.99529	1.09544
1.64013	1.75541	1.02985
1.24834	1.50656	0.916967
2.07576	2.04225	1.12835
3.15687	3.28133	1.05109
3.18606	3.16716	1.09583
3.86171	3.64185	1.15659
2.92981	2.9455	1.09649
3.51842	3.29909	1.16621
3.27095	3.01124	1.21553
1.82146	1.93348	1.0273
3.42721	3.5456	1.04921
3.03811	3.04789	1.09815
3.21838	3.00419	1.19289
2.49423	2.39196	1.15967
2.79618	2.99556	1.01902
1.98228	2.38476	0.906253
2.89299	2.80403	1.13842
2.26173	2.39818	1.03753
3.19405	2.92668	1.25366
3.54543	3.32305	1.16806
3.28754	3.50816	1.02182
2.2073	2.45694	0.987296
2.94639	3.04035	1.04576
1.26643	1.50138	0.927786
2.75748	2.80114	1.08406
4.14837	3.87009	1.17519
2.90572	2.74504	1.21961
3.78848	3.30852	1.277
1.89259	2.03895	1.06059
1.97925	2.19063	0.986713
3.28265	4.07661	0.908917
2.67602	2.6975	1.10886
2.61731	2.72566	1.04363
4.45786	4.01022	1.20516
3.31541	3.26519	1.1207
2.64748	2.5805	1.13092
4.49002	4.45097	1.117
2.68851	2.81029	1.06367
3.07495	3.27447	1.05133
2.38072	2.35547	1.13694
2.24495	2.37257	1.06386
3.84757	3.57546	1.16526
1.96496	2.0362	1.11618
1.8463	1.94014	1.05911
2.45268	2.6386	1.03039
1.63393	1.8412	0.965363
2.73159	2.65958	1.13439
3.29832	2.99115	1.24217
2.39205	2.32116	1.15701
2.23626	2.29405	1.07274
1.86337	2.02448	1.03165
2.7263	2.61386	1.1539
3.02669	2.81294	1.21717
5.40478	5.16438	1.16265
3.71025	3.82458	1.0643
3.60549	3.65372	1.06398
1.79106	1.86046	1.06078
3.25203	3.14899	1.13532
3.01274	2.99915	1.09751
2.91607	2.81826	1.15413
3.24293	3.34703	1.06497
4.36607	4.28991	1.11353
2.92546	2.63654	1.22766
1.80067	1.8859	1.05454
1.74182	1.99068	0.964674
2.11236	2.32787	1.00884
3.21753	3.24771	1.12276
2.67359	2.6524	1.11483
2.64215	2.55109	1.14605
3.17872	3.14905	1.1074
1.76313	1.87787	1.05298
3.01785	2.94088	1.14317
2.18674	2.24859	1.06699
2.02995	2.14457	1.04799
3.86348	4.1972	1.00756
3.08828	2.97924	1.17131
2.83302	3.04324	1.04242
2.09486	2.14625	1.08034
1.79482	1.98147	1.01824
5.13993	4.79355	1.17364
2.17104	2.16134	1.15025
3.57248	3.42828	1.14472
3.79632	3.84242	1.07916
2.39601	2.32857	1.14574
3.40827	3.80878	0.992403
2.771	2.54167	1.19866
1.85946	1.78114	1.1653
2.31253	2.33429	1.09837
2.29222	2.2215	1.13112
4.69837	4.65466	1.09873
1.87902	1.93975	1.0567
3.34068	3.55147	1.03846
3.36177	3.48374	1.05713
3.17821	3.37877	1.03388
3.17621	3.46048	1.00546
3.80758	3.82382	1.08577
2.70709	2.78966	1.07153
2.81232	3.0684	0.999344
2.59091	2.34891	1.22531
2.64791	2.46036	1.19476
3.82957	3.6771	1.16188
3.7324	3.67614	1.10721
2.87866	2.94534	1.0932
4.24637	4.07386	1.13546
1.41022	1.67967	0.954865
1.90262	2.03241	1.0726
3.46874	3.60095	1.06439
2.37126	2.41531	1.10071
1.87902	1.87959	1.10222
2.75783	2.76531	1.11321
2.32319	2.37927	1.10123
1.76614	1.88893	1.05469
1.62005	1.7125	1.07599
3.08106	2.92386	1.14267
3.33344	3.51291	1.03555
3.29002	3.18147	1.15092
2.77819	3.1596	0.95044
3.17855	3.42205	1.05716
3.60244	3.14352	1.25534
2.15793	2.14323	1.11565
3.40277	3.50523	1.0662
3.78399	3.42668	1.22746
1.53787	1.69098	1.0067
2.53372	2.9472	0.95293
4.11053	4.32289	1.04982
1.97583	2.17732	1.05131
4.52391	4.47387	1.11093
2.20687	2.46721	1.00848
2.22662	2.43935	1.03109
2.60932	2.6164	1.11195
2.5981	2.44962	1.16679
2.37852	2.51604	1.04884
2.40714	2.71664	1.00446
3.45027	3.9393	0.971771
2.32173	2.33849	1.11171
3.08125	2.97543	1.14129
4.70571	4.38826	1.17746
4.26751	4.00506	1.17584
2.16005	2.28153	1.03671
2.79173	3.06818	0.977293
3.47116	3.63705	1.04447
2.25758	2.21069	1.12357
2.4874	2.61553	1.04897
3.10999	2.9648	1.15681
2.62475	2.84132	1.01562
3.13191	2.72505	1.28144
4.03763	3.86156	1.15971
3.42862	3.34413	1.11425
2.16252	2.37863	1.01561
1.67691	1.88384	0.973863
3.7158	3.6252	1.13974
5.07334	5.02359	1.09558
2.35815	2.7624	0.923701
2.93323	2.78896	1.1682
2.1623	2.23869	1.06312
4.18378	4.40033	1.0548
3.47279	4.00229	0.957904
3.7351	3.60685	1.14383
1.89635	2.40513	0.879768
3.81786	3.79093	1.0998
3.2399	3.26175	1.09686
2.38575	2.89564	0.905502
3.58953	3.40519	1.15636
2.11169	2.46271	0.961837
2.36571	2.72338	0.956353
4.59461	4.6869	1.06797
2.49274	2.50587	1.08858
3.0045	2.79494	1.1766
3.85411	3.98307	1.05457
4.29743	4.21434	1.11289
4.33943	4.27221	1.12842
2.10535	2.14612	1.08874
2.13158	2.18447	1.06743
1.54383	1.68909	1.03515
2.24641	2.1513	1.16571
1.97205	2.22508	1.00263
1.61721	1.92884	0.926213
1.94971	2.09329	1.08327
2.43577	2.40073	1.13954
2.91725	3.34869	0.949394
4.13662	4.39212	1.02401
2.68682	2.75246	1.10748
2.17466	2.27163	1.07596
3.80648	3.58247	1.17798
2.01776	2.20498	1.0161
1.89662	2.13712	1.00394
1.27651	1.49272	0.92893
1.45061	1.6162	0.982942
1.6147	1.99459	0.925831
2.28947	2.31968	1.11504
2.47285	2.38501	1.145
2.61677	2.74828	1.0521
3.60086	3.46313	1.17852
4.75272	4.79692	1.07716
2.51044	2.47837	1.14006
2.51825	2.77383	1.00091
3.65481	3.24979	1.25727
1.1728	1.50034	0.873122
2.16433	2.21823	1.08394
2.29421	2.34102	1.10248
2.29842	2.48825	1.06475
1.95351	2.36183	0.918305
1.85374	1.9503	1.05345
2.30186	2.25979	1.12633
3.10088	2.85547	1.21025
3.62819	3.4086	1.16698
3.9153	3.85358	1.12146
2.75905	2.96005	1.02991
3.17029	3.34964	1.04333
2.93616	2.92464	1.12647
2.86543	2.90446	1.0929
2.71336	2.70729	1.12832
3.21602	2.95446	1.19876
3.36736	2.89319	1.27038
2.47411	2.41164	1.15501
2.54915	2.82607	1.02606
1.76981	1.99371	1.00104
2.80796	2.99942	1.0184
2.54239	2.86316	0.991368
1.60769	1.89613	0.97809
3.55458	3.57619	1.08133
3.7798	3.42629	1.2208
2.15576	2.21248	1.07336
3.70043	3.71864	1.08424
4.99288	4.85099	1.13026
2.45029	2.48948	1.12006
2.22389	2.33789	1.09136
2.41872	3.09324	0.89302
2.12253	2.28533	1.04874
2.03561	2.34175	0.988135
2.727	2.65186	1.14912
1.96493	2.14798	1.04764
1.25833	1.54163	0.908626
1.2165	1.63203	0.842678
3.48532	3.65113	1.03866
3.60024	3.55392	1.12624
2.69984	2.74172	1.09392
2.04054	2.17565	1.04162
2.52032	2.49041	1.12464
2.30008	2.27962	1.12167
1.62928	1.69149	1.07142
1.57044	1.85834	0.967809

## Sheet: delta whyD
cell area	cell length	cell width		cell area mean:	2.0047		cell area std dev:	0.5533
1.8242	2.084	0.969242		cell length mean:	2.23		cell length std dev:	0.5274
1.24087	1.52092	0.898246		cell width mean:	0.9878		cell width std dev:	0.074
1.67708	1.85743	0.994565
1.3282	1.81078	0.8373
2.03238	2.21389	1.00997		[h,p] = ttest2(cArea_deltalytA, cArea_deltawhyD, 'Vartype', 'unequal')
2.67308	2.82836	1.02855		h = 1 (rejects null hypothesis)
2.19753	2.50636	0.947712		p = 4.6817e-08
3.11571	3.14776	1.08072
1.99742	2.34698	0.93311		[h,p] = ttest2(cLng_deltalytA, cLng_deltawhyD, 'Vartype', 'unequal')
2.69819	2.78748	1.05445		h = 1 (rejects null hypothesis)
2.24169	2.51142	0.966375		p = 0.0061
2.25966	2.51899	0.978559
1.60738	1.94565	0.911451		[h,p] = ttest2(cWidth_deltalytA, cWidth_deltawhyD, 'Vartype', 'unequal')
3.04851	3.16825	1.04397		h = 1 (rejects null hypothesis)
2.64642	2.87083	1.00742		p = 1.9981e-31
2.79836	2.91591	1.06068
3.11784	3.14216	1.07797
2.54077	2.71048	1.0255
2.59465	2.83237	1.00199
1.59143	1.81624	0.968139
2.3738	2.64635	0.978909
2.20311	2.4421	0.988347
2.41212	2.66864	0.985914
2.31662	2.2924	1.12282
1.284	1.60727	0.873732
2.30931	2.45899	1.03649
2.25319	2.27543	1.09399
2.02095	2.075	1.0754
2.14159	2.23689	1.06284
2.50015	2.67617	1.02756
2.12946	2.22916	1.05659
1.92577	2.05421	1.02861
1.8053	2.00201	0.991137
1.49785	1.86974	0.868699
2.50941	2.74938	0.994078
1.65093	2.09362	0.88578
1.2765	1.53176	0.930814
1.22427	1.48797	0.920166
1.76838	1.9776	0.981548
0.878092	1.23879	0.783213
1.05708	1.42139	0.831134
1.69264	2.0238	0.916984
1.71021	2.02358	0.926994
2.02633	2.4312	0.923411
1.57642	1.90838	0.896041
2.3854	2.55732	1.01039
1.98961	2.18494	0.998724
2.19718	2.57608	0.929081
1.28063	1.51096	0.931556
1.00078	1.38013	0.814678
1.26413	1.56536	0.884281
2.01955	2.31804	0.960566
2.2987	2.52392	0.983459
1.807	1.8436	1.10953
1.47683	1.74923	0.940021
1.66013	1.90337	0.982683
1.37966	1.72393	0.893218
2.51657	2.70514	1.00806
1.32343	1.61181	0.898903
1.9982	2.35327	0.942081
1.63098	2.03001	0.905241
1.57076	1.86797	0.94249
1.18462	1.58486	0.834458
1.30218	1.63392	0.881969
1.74207	1.84178	1.05487
2.12265	2.41106	0.973229
1.42667	1.61335	0.961315
2.30146	2.5173	1.02128
2.62217	2.49916	1.15717
1.91968	2.21072	0.959925
1.82064	2.11182	0.941642
1.76463	1.95945	0.987897
2.55236	2.75591	1.00766
2.22741	2.27385	1.07002
1.92155	2.02731	1.05123
1.35386	1.70638	0.883263
1.64725	2.08326	0.867759
1.93332	1.9585	1.08087
1.79176	2.09302	0.928984
2.78841	3.10825	0.979946
2.4777	2.88332	0.93442
2.04313	2.04475	1.09256
1.91249	1.99316	1.07911
3.57709	3.52586	1.10554
2.44544	2.78227	0.946435
1.1541	1.46045	0.867624
1.60886	1.89274	0.932869
1.50765	1.77002	0.944839
2.12181	2.36052	1.0027
3.57854	3.76319	1.0388
2.76711	3.02969	0.996934
1.63641	1.84415	0.994117
2.83422	3.08709	0.99974
2.07022	2.31328	0.987349
2.25535	2.40022	1.03509
2.09658	2.31199	0.997232
2.51801	2.78807	0.980159
1.96709	2.10789	1.02168
1.84608	2.01816	0.999632
2.03518	2.36107	0.959267
1.28858	1.84732	0.833738
1.9201	2.39033	0.885527
1.93729	2.07965	1.02454
1.80884	1.95384	1.01656
1.86845	2.16468	0.997723
1.72692	1.98834	0.97211
1.74081	2.08202	0.958365
1.61509	1.90011	0.924963
2.40109	2.82868	0.921508
2.5384	2.92492	0.948652
1.48939	1.86047	0.866016
1.02153	1.31988	0.845652
1.34834	1.6794	0.921827
1.46759	1.50631	1.07294
1.60265	1.76683	1.00406
2.37513	2.32115	1.15019
1.85928	1.89837	1.07907
1.58804	1.71388	1.03202
1.06101	1.59441	0.741534
1.49783	1.72354	0.953207
1.52198	1.62502	1.02585
1.72445	1.87789	1.00767
2.13955	2.26511	1.06111
2.20059	2.27883	1.07117
2.00445	2.02797	1.10224
1.90622	1.91268	1.08499
1.88793	2.1527	0.961271
2.0643	2.32703	0.977306
1.23381	1.57643	0.900041
1.30946	1.67189	0.902688
1.77712	1.95996	0.99484
1.96679	2.2105	0.979093
1.72692	1.80861	1.04933
1.83836	1.93674	1.02938
3.07149	3.33853	1.0107
1.43676	1.69833	0.935836
1.30001	1.72228	0.858646
2.0244	2.40773	0.936395
1.47418	1.65657	0.980024
1.52443	1.76577	0.959237
1.86665	2.02736	1.02662
1.77371	2.04096	0.993651
1.90245	2.26043	0.934856
1.68682	1.93539	0.945871
1.28219	1.52187	0.930487
1.12081	1.48943	0.834538
1.22722	1.49448	0.917876
2.1527	2.12941	1.12019
1.83061	2.12187	1.00211
1.30516	1.68831	0.881496
1.60343	2.02766	0.893738
2.74531	3.14301	0.951655
1.66676	1.98855	0.932844
2.84543	3.0181	1.04807
1.68834	2.10181	0.88849
1.42047	1.64664	0.94281
1.60558	1.90915	0.938831
1.61017	1.87448	0.956985
2.30777	2.80832	0.908354
1.15342	1.35639	0.949222
1.63746	2.19438	0.846555
1.59663	1.78029	0.978213
1.73333	2.04993	0.947476
1.1735	1.49643	0.863078
2.03885	2.17029	1.05013
4.1927	4.16	1.09444
2.2247	2.61944	0.919724
2.15283	2.71442	0.908584
1.52006	2.051	0.84283
1.85535	2.20789	0.932171
2.74784	2.7855	1.08475
2.84871	3.01015	1.05986
2.79162	2.58188	1.17306
2.0725	2.45161	0.937999
2.44807	2.68825	0.999658
2.32856	2.87252	0.907774
2.78589	2.86264	1.08998
1.22375	1.5027	0.902523
2.34375	2.72788	0.94839
1.88784	2.03069	1.04232
2.19667	2.31682	1.04985
2.37108	2.92206	0.884214
1.71384	2.0577	0.910951
1.34487	1.73542	0.855697
1.31655	1.6584	0.873877
1.45485	1.8228	0.893545
1.80278	2.13258	0.93895
1.79216	1.95016	1.00357
1.71038	1.96219	0.951494
1.59638	1.8168	0.973453
1.3677	1.64411	0.92076
1.23008	1.49585	0.912123
2.50263	2.79265	0.97279
1.5664	1.91576	0.896369
2.07137	2.57447	0.897885
2.39276	2.76336	0.939755
1.26279	1.63226	0.860846
2.70835	3.0332	0.974842
1.42446	1.6868	0.937615
1.26789	1.54712	0.89033
2.97575	3.41819	0.948897
1.64099	1.97324	0.944835
1.85722	2.14749	0.951438
2.54361	2.72495	1.01244
2.03122	2.55829	0.861071
2.58951	3.02501	0.933484
2.12088	2.34443	1.01674
1.84417	2.0249	1.02949
2.55821	2.71539	1.04504
3.06811	3.25084	1.03735
1.43513	1.63546	0.965703
2.30261	2.61401	0.979985
2.48392	2.87378	0.939764
2.43696	3.03632	0.865717
1.59156	1.69841	1.02769
1.86068	1.9102	1.06966
1.78548	1.94474	1.0174
1.71601	1.7897	1.06129
1.75084	2.04307	0.964667
1.87538	2.08851	0.990931
2.30361	2.45132	1.03528
3.15669	3.25628	1.07996
1.98443	2.24389	0.967257
1.41822	1.85262	0.856028
1.94115	2.17282	1.01164
2.31259	2.67555	0.955314
3.55258	3.57598	1.0912
2.00517	2.23136	0.997697
2.26066	2.35241	1.05269
2.48562	2.76485	0.976506
2.20843	2.51793	0.968284
1.41752	1.74772	0.903077
2.33266	2.72013	0.932229
1.47214	1.78888	0.896294
3.77243	3.84676	1.06384
1.40662	1.69143	0.947215
1.64128	1.87675	0.952595
1.46145	1.8237	0.89858
2.07759	2.2868	0.998979
1.77489	2.28024	0.859485
2.23371	2.54856	0.968419
1.88543	2.17104	0.950541
2.04939	2.49184	0.900586
1.94258	2.19239	0.981504
1.92551	2.1372	1.00225
1.7362	1.95131	0.987944
2.29632	2.7646	0.906753
1.86442	1.82714	1.1127
2.08159	2.08562	1.1072
1.9773	2.01936	1.09286
1.6419	2.1124	0.874615
2.071	2.15966	1.07164
3.31183	3.47383	1.03109
3.10217	3.30186	1.02507
1.795	1.99842	1.03204
1.86023	2.02498	1.04603
1.8985	2.02597	1.03864
1.61974	1.75633	1.02623
2.99322	3.35413	0.97465
2.18664	2.59514	0.917749
1.71304	2.08111	0.915756
1.40717	1.78614	0.875743
1.74301	1.78538	1.07181
1.46333	1.7852	0.929638
2.03797	2.35884	0.948035
1.31201	1.49905	0.962319
1.9392	2.38014	0.898498
1.85228	2.00835	1.02397
1.49518	1.81076	0.926617
1.06774	1.42058	0.837686
1.32965	1.56838	0.928688
2.54328	3.0222	0.913034
3.10159	3.5073	0.96373
2.30513	2.42225	1.07424
1.48452	1.64969	0.985212
1.44572	1.77945	0.902156
2.86068	2.89598	1.08557
1.35379	1.58746	0.976187
1.50166	1.79866	0.949234
1.703	1.83863	1.06892
2.87616	3.19205	0.978834
2.21208	2.33852	1.04159
2.80165	2.83857	1.08168
2.5329	2.51282	1.10784
2.023	2.16041	1.03906
2.00319	2.25197	0.966662
2.16228	2.47558	0.954406
2.36867	2.63404	0.989879
1.76718	1.99862	0.979901
1.66599	1.85441	0.995275
2.73027	2.93261	1.00871
2.56593	2.64093	1.07135
2.35338	2.53013	1.02102
1.28667	1.58465	0.887786
2.40134	2.37306	1.12127
2.93493	2.98808	1.0774
2.86059	3.02037	1.02318
1.30611	1.70198	0.854002
2.59391	2.69576	1.05511
2.54264	2.70297	1.02792
2.33761	2.24191	1.14882
2.50047	2.47284	1.11685
1.96097	2.06405	1.05602
2.75315	2.91922	1.017
2.51854	2.77322	0.985557
2.70598	3.2344	0.912786
2.08769	2.12933	1.07244
1.3049	1.67701	0.880141
1.53992	1.94824	0.874864
1.73903	2.07957	0.941918
2.41103	3.02935	0.882076
1.71431	1.93216	0.97193
1.67497	1.86938	0.979149
2.78009	3.08219	0.981519
1.69914	1.78659	1.05945
1.89272	2.00505	1.04513
2.68286	3.02257	0.964923
2.80195	3.11472	0.976534
1.73153	1.93112	0.985474
2.02001	2.1255	1.04387
1.30866	1.56382	0.92371
1.69486	1.94732	0.952549
2.09119	2.54312	0.898264
1.78027	1.9037	1.02714
1.81638	1.93723	1.02697
2.04079	2.08233	1.08518
1.81495	2.05899	1.00306
1.95022	2.20345	0.983337
2.57721	2.79077	1.00868
1.49535	1.73781	0.943362
1.55734	1.87394	0.925247
2.18159	2.46086	0.962833
1.70947	1.88979	1.00205
1.62759	1.82467	0.992658
1.82545	2.07199	0.973554
1.62494	1.82616	0.984412
1.70107	1.8768	0.998614
1.78811	2.04831	0.974486
1.70018	1.87581	0.996175
1.94731	2.22663	0.983016
2.17476	2.27585	1.0513
1.87168	2.15937	0.984597
2.59702	2.92839	0.969428
1.59173	1.70629	1.03911
1.4841	1.62953	1.00429
2.08861	2.15548	1.08755
1.59125	1.72695	1.04264
2.75346	3.04081	0.989495
2.25019	2.66514	0.933006
1.9461	2.27825	0.962737
1.57942	1.83729	0.937833
1.69494	1.93609	0.958763
1.89782	2.06845	1.00999
1.75944	2.10327	1.00084
2.17569	2.27236	1.04863
2.03711	2.06421	1.09138
1.49041	1.67342	1.01327
1.81218	1.953	1.01296
1.53445	1.67657	1.00896
1.77223	1.86298	1.04085
1.16332	1.51845	0.838386
1.20925	1.59101	0.8411
3.01752	3.38508	0.972263
1.39581	1.58435	0.969236
1.70316	2.26995	0.836206
1.15315	1.4541	0.888261
1.00562	1.31363	0.832962
1.4278	1.82371	0.883251
2.49662	2.64394	1.0297
3.23844	3.241	1.07618
2.93533	3.17564	1.01796
2.36387	2.52932	1.03377
2.83512	2.96603	1.03716
2.53889	2.81348	1.01396
1.64065	1.90785	0.972576
1.57109	1.89078	0.93528
1.62181	1.73124	1.02071
1.74521	1.77057	1.10352
1.67335	1.87363	1.01523
1.83885	2.00782	1.03702
3.03484	3.30569	1.01423
2.77879	2.80105	1.08711
2.17916	2.54535	0.940373
1.90927	2.20319	0.978161
1.4036	1.69808	0.936476
1.59816	2.05277	0.885252
1.82171	2.04554	1.00213
2.39711	2.63069	1.00297
2.12301	2.28887	1.02865
1.59576	1.87416	0.948607
1.70324	1.97377	0.954737
1.38808	1.82013	0.846762
2.95397	3.36969	0.956388
1.9312	2.12955	1.00534
1.63618	1.86168	0.980456
1.611	1.99583	0.926098
1.54429	1.85888	0.960315
2.80519	2.98652	1.03077
2.27585	2.70772	0.922471
2.13555	2.44572	0.96122
2.5138	2.92233	0.931361
1.47468	1.77084	0.917198
1.39334	1.78474	0.863343
1.57001	1.84269	0.970928
2.24382	2.5167	0.965311
1.77937	1.98008	0.994739
1.98678	2.14274	1.02643
3.27495	3.65024	0.986588
1.91783	2.0479	1.08508
1.67841	1.9608	0.976925
2.54688	2.9384	0.943385
1.5049	1.68986	1.01137
1.70976	1.87576	1.01942
2.48159	3.03242	0.889765
2.29767	2.56975	0.974993
1.22817	1.4708	0.925412
1.48672	1.74904	0.966531
2.50638	2.58872	1.06268
2.80015	2.80108	1.09342
1.46402	1.79308	0.938295
2.88145	2.97642	1.05124
1.67179	1.77619	1.05037
1.62829	1.83093	0.987477
2.93109	2.9821	1.07295
2.186	2.23593	1.10361
1.74211	1.85729	1.02009
2.94032	3.00768	1.06717
2.56796	2.47407	1.14914
2.06326	2.23705	1.02246
2.34482	2.54173	1.01245
2.86457	2.82453	1.10808
2.77216	2.84808	1.05845
1.75506	1.91789	1.00716
2.7929	2.95787	1.03986
2.10579	2.22579	1.0349
2.46227	2.52886	1.06395
1.76856	2.12852	0.900776
1.4668	1.69812	0.957112
2.81506	2.62422	1.19485
1.6318	1.90122	0.9593
2.1541	2.19393	1.07983
2.27306	2.30631	1.1005
1.35807	1.81054	0.819313
1.47395	1.82397	0.880014
1.4932	1.80403	0.920822
1.36711	1.66881	0.92564
1.75605	1.94786	0.998132
2.61016	2.64931	1.07541
3.21743	3.3059	1.06101
2.92182	3.13143	1.01908
2.72755	3.03353	0.980566
2.69012	2.91481	0.999884
1.48194	1.81325	0.920588
2.18365	2.39371	1.01194
2.00014	2.20657	0.98178
3.07581	3.10043	1.08566
3.48776	3.51086	1.10152
1.88411	2.04298	1.02875
1.96348	2.15137	1.0023
1.95942	2.13996	1.03729
2.0869	2.16206	1.07474
4.43333	4.67719	1.01812
1.61174	1.8965	0.971585
1.52203	1.6542	1.01496
2.7212	2.8168	1.05882
3.25511	3.36637	1.05949
1.90696	2.01438	1.04683
1.96642	2.16981	0.993271
2.1833	2.52701	0.97589
2.04919	2.15587	1.048
1.84179	1.986	1.04802
1.96902	2.47133	0.87813
1.31653	1.54968	0.939884
1.57208	1.83412	0.963434
1.604	1.8253	0.984765
1.52092	1.656	1.00274
1.86431	1.94648	1.04963
2.19221	2.2079	1.09186
1.78929	2.02849	0.993808
1.75282	1.95207	0.983232
2.32727	2.46478	1.05341
2.71881	2.70354	1.12747
1.35019	1.75216	0.858363
1.46053	1.85904	0.8845
1.29975	1.61763	0.875898
1.29166	1.57624	0.897989
1.35445	1.60497	0.924792
1.73686	1.94945	0.976541
1.96842	2.12935	1.01647
1.9038	2.01656	1.04729
1.04684	1.34081	0.858917
2.53774	2.84314	0.96815
1.8485	1.97057	1.04394
1.62699	1.84986	1.00216
3.1923	3.42058	1.02694
1.71069	1.91207	0.987527
3.44498	3.57165	1.07223
2.0073	2.10741	1.08066
1.9209	2.07187	1.03021
1.89526	2.01338	1.08005
3.34369	3.42571	1.08686
1.94575	1.98236	1.0806
1.94835	1.95535	1.08015
1.90506	1.90801	1.09623
1.49874	1.65727	0.992445
1.70978	1.91164	1.00446
1.79743	1.95729	1.01973
3.13506	3.27575	1.06532
1.60608	1.83018	0.968124
1.56159	1.76249	1.01123
1.73121	2.01628	0.984565
2.8147	3.02765	1.01908
1.59395	1.8047	0.986695
1.77863	1.95309	1.07229
1.64576	1.91668	1.00658
3.30615	2.99634	1.22435
2.85066	2.86043	1.08451
2.88447	2.97989	1.0829
2.35778	2.23455	1.16385
2.16194	2.09932	1.16132
2.14199	2.24851	1.07942
2.64707	2.42955	1.20159
2.06882	2.1859	1.03518
2.52139	2.59303	1.05319
1.5642	1.73918	0.993136
2.02397	2.151	1.02703
1.96238	1.99202	1.08061
1.65928	1.87571	1.02249
1.82239	2.14292	0.98221
2.46665	2.85118	0.938636
1.78398	2.02462	0.965953
2.0764	2.1945	1.03679
1.81599	1.86818	1.10909
2.71962	2.77273	1.09464
1.73354	1.83655	1.07461
2.86492	3.08006	1.02184
2.7848	3.14425	0.975255
2.68599	3.03985	0.966383
3.02792	3.09488	1.08863
1.54089	1.6946	1.02862
1.89888	2.03734	1.06758
3.2142	3.24932	1.09277
1.90561	2.02515	1.08541
1.72543	1.87935	1.0098
1.47841	1.74247	0.944138
2.12993	2.24977	1.04212
1.51278	1.63982	1.02536
2.46891	2.62274	1.04222
1.48931	1.82544	0.922631
1.94829	2.14823	1.02558
1.66952	2.01803	0.925627
1.46386	1.6907	0.967212
1.2819	1.64405	0.881432
2.58072	2.99975	0.963537
2.40038	2.83913	0.930023
2.69112	2.81517	1.04808
1.93996	1.93872	1.10377
1.34142	1.62531	0.906187
1.75246	2.19045	0.875605
1.36257	1.87471	0.802208
1.52496	1.6704	1.01558
2.26742	2.59253	0.968602
1.526	1.78243	0.964153
1.51226	1.60091	1.0682
1.83082	1.89719	1.08154
2.00152	2.03026	1.13553
1.6389	1.71691	1.07314
1.42427	1.70461	0.947401
1.65571	2.06096	0.892517
