# Supplementary material for: WhyD tailors surface polymers to prevent premature bacteriolysis and direct cell elongation in Streptococcus pneumoniae
Source: eLife. 2022 May 20;11:e76392. doi: 10.7554/eLife.76392 (PMC9208761; doi:10.7554/eLife.76392)
Supplement: Figure 4—source data 2. [file elife-76392-fig4-data2.xlsx]

## Sheet: wt_thy
cell area	cell length	cell width		cell area mean:	1.7059		cell area std dev:	0.3978
1.87694	2.271	0.90897		cell length mean:	1.9952		cell length std dev:	0.3731
1.49243	1.91395	0.86656		cell width mean:	0.9482		cell width std dev:	0.0803
1.65018	2.13667	0.844675
1.42925	1.70693	0.950466
1.42591	1.79141	0.887169
1.33241	1.65697	0.909228
1.82411	1.94854	1.01866
1.7983	2.30005	0.848708
0.946456	1.33996	0.771875
1.69191	2.21851	0.841807
1.88697	2.09471	0.988413
1.21245	1.52556	0.873112
0.912171	1.29016	0.771786
2.03802	2.36117	1.01555
2.55763	2.7152	1.03972
1.48138	1.87594	0.876384
2.30339	2.59355	0.96356
1.37701	1.69244	0.894065
0.864468	1.30059	0.709484
2.23145	2.66752	0.91985
0.977244	1.37437	0.804403
2.05756	2.31366	0.982128
2.01243	2.25974	0.982411
1.47669	1.87397	0.869494
1.38726	1.75386	0.852205
1.31169	1.51519	0.965835
1.36141	1.57836	0.959197
2.28531	2.41792	1.04512
1.89486	2.18918	0.947809
2.80014	3.08523	0.996862
1.76391	2.06464	0.943623
1.98731	2.30131	0.948439
1.48743	1.73577	0.983149
1.13909	1.49762	0.83495
2.06076	2.54555	0.870964
2.06109	2.22134	1.01733
1.49477	1.69365	1.00045
1.94518	2.23501	0.965823
2.73676	2.98009	1.0031
2.0783	2.30259	0.990159
1.01052	1.36595	0.811637
2.06835	2.45393	0.982003
2.60308	2.7078	1.08147
1.62233	1.85552	0.976659
1.67943	2.13763	0.854255
0.980458	1.32456	0.821148
2.49021	2.76298	0.98719
2.12941	2.50611	0.938536
1.65088	2.11554	0.876158
2.04935	2.50719	0.886055
2.22478	2.27606	1.06142
1.62768	2.05683	0.874881
1.95463	2.52212	0.848823
1.91921	2.3311	0.908612
2.03977	2.47138	0.903856
1.75192	2.01681	0.968746
1.90025	2.28308	0.914062
1.29998	1.74253	0.884094
1.45764	1.93453	0.823781
1.4148	1.88946	0.833563
1.45216	1.61953	0.984838
1.87213	2.26304	0.896537
1.3829	2.00281	0.791941
1.57219	1.89619	0.905677
1.36882	1.75593	0.874026
1.09228	1.69646	0.719924
1.38652	1.74486	0.900515
2.50272	2.97516	0.960567
1.8888	2.45101	0.843385
1.98389	2.2885	0.972897
1.44403	1.91402	0.95896
1.29702	1.81364	0.83656
2.32473	2.65639	0.957704
1.68939	1.98043	0.946443
1.50963	1.75684	0.946258
1.59302	1.72469	1.03851
1.94398	2.14678	0.989473
2.5055	2.81658	0.994222
2.05837	2.52065	0.882576
2.19778	2.80172	0.865356
2.00216	2.04241	1.12155
1.88104	2.13584	0.972091
1.71825	2.20008	0.888515
1.92205	2.15741	0.980352
2.03171	2.34721	0.989477
2.32195	2.38881	1.08173
2.10048	2.43465	0.971832
1.44246	1.8086	0.881689
2.27518	2.81708	0.877514
2.38921	2.66011	0.982634
2.01256	2.18628	1.0105
1.42995	1.74965	0.902521
0.959678	1.36751	0.805753
1.67686	1.85993	0.998883
1.13089	1.44603	0.857897
1.1154	1.49592	0.826091
1.74103	2.01799	0.960634
1.91166	2.297	0.912952
1.55287	1.9201	0.981493
1.73046	1.85564	1.01736
2.66865	2.914	1.00083
1.54091	1.9334	0.870298
1.92445	1.96522	1.0746
1.26452	1.65956	0.846562
2.52975	2.57538	1.07601
1.96044	2.07802	1.02316
1.95377	2.2387	0.954414
1.74232	1.98994	0.973761
1.65661	2.14328	0.842812
2.25097	2.82406	0.861301
1.35578	1.64717	0.90273
1.8348	2.31567	0.859023
2.05245	2.4717	0.956846
1.44848	1.96556	0.847824
1.70197	2.07019	0.903049
1.93463	2.18363	0.970548
1.56113	1.84799	0.977356
1.93582	2.22829	0.98887
2.19313	2.33207	1.05061
2.11747	2.12828	1.10915
1.59154	1.93053	0.994357
1.65413	1.97933	0.935522
1.37565	1.84612	0.82168
2.09026	2.55123	0.887586
1.64813	2.19002	0.822264
1.87716	2.15626	0.978971
2.04703	2.45224	0.915318
2.47261	2.54432	1.06907
2.14292	2.3469	1.04125
1.75928	2.19461	0.882408
2.03172	2.09227	1.06769
1.35621	1.75423	0.948636
1.67191	1.74699	1.05952
1.61649	1.84595	0.956205
1.19091	1.59309	0.820277
0.994906	1.38327	0.808176
1.00437	1.39668	0.80059
1.02256	1.44158	0.776302
1.48296	1.96108	0.832855
2.17856	2.50912	0.953625
1.74346	1.89619	1.02303
1.84406	2.22499	0.912018
2.73382	2.93798	1.01906
1.47443	1.75004	0.96322
1.48304	1.82658	0.899313
1.09413	1.56907	0.749484
1.5271	1.92693	0.869724
2.11125	2.13201	1.06358
1.84835	2.09487	0.984777
1.49838	2.03497	0.81346
1.38846	1.84668	0.900044
1.91781	2.23555	0.99646
1.74913	2.02141	0.975366
1.69149	2.09064	0.883094
1.26473	1.57395	0.871475
1.3731	1.57368	0.964145
1.80189	1.99203	1.00344
2.06745	2.4394	1.01824
1.54499	1.77383	0.955708
1.67824	1.9378	0.939376
1.44326	1.72668	0.969289
2.71171	2.722	1.08721
1.22125	1.61309	0.841316
1.14435	1.59648	0.78321
1.6344	1.88592	0.956521
1.6664	2.01884	0.902268
2.17695	2.20217	1.10282
1.28323	1.70584	0.827049
1.56071	1.93007	0.883127
1.13538	1.62286	0.762685
1.86295	1.90983	1.0985
2.08995	2.14179	1.10398
0.954212	1.34667	0.812329
2.65382	2.98215	0.962185
1.87516	2.00106	1.04037
1.44234	1.71489	0.937244
1.30479	2.03708	0.710617
1.82648	2.10617	0.970819
2.02153	2.39593	0.920675
1.74511	1.88094	1.02569
1.79331	2.06863	0.973989
1.52229	2.06665	0.865476
1.50087	1.83072	0.942753
1.76122	2.03994	0.964279
1.74834	1.88432	1.01778
1.47729	1.76837	0.948176
1.8469	2.00287	1.03081
1.68934	1.88648	1.00274
1.86766	1.97304	1.05379
1.47297	1.64519	0.965308
1.8982	2.14361	0.976913
1.49668	1.86959	0.910425
1.47025	1.87273	0.987625
1.80957	2.11517	0.968251
1.9595	2.26683	0.948071
1.74543	2.04429	0.955812
1.70595	1.97862	0.968141
1.68105	1.90715	0.991188
2.00596	2.19238	1.00582
2.08782	2.21827	1.05728
1.94999	2.17632	1.04304
2.26569	2.36775	1.06443
1.31882	1.52271	0.982651
2.07095	2.19948	1.05902
1.41715	1.76669	0.896598
2.07085	2.08765	1.11187
1.92735	2.2613	0.98517
1.32601	1.71469	0.894505
2.63872	2.82731	1.03947
2.52083	2.5053	1.09815
1.29562	1.51066	0.943475
1.60146	1.99205	0.925931
1.92432	2.08403	1.01587
1.32062	1.49383	0.980954
2.22584	2.39476	1.02423
2.24276	2.33462	1.06551
1.36922	1.62789	0.944214
1.71134	1.79999	1.0407
1.53205	1.83995	0.986871
1.2454	1.57952	0.86865
1.79411	2.05243	0.96407
1.37346	1.57957	0.964802
1.56613	1.93439	0.93634
1.77278	2.10253	0.939313
1.71938	2.01903	0.94478
1.95487	2.30395	0.959934
2.33462	2.43449	1.08786
1.47864	1.76841	0.939162
1.19325	1.61138	0.812024
2.47079	2.62393	1.00814
2.30647	2.55416	0.987472
1.93904	2.08808	1.07103
1.65629	2.08066	0.920918
1.85213	2.16203	1.05735
2.03356	2.39348	0.926787
1.55223	1.87956	0.982045
2.2711	2.51346	0.993093
1.44419	1.69096	0.979914
1.21845	1.53938	0.888754
1.84002	1.8671	1.09552
1.83152	2.43922	0.884721
2.24886	2.46139	1.00018
2.28358	2.41747	1.11328
1.57	1.69617	1.04744
2.11703	2.41827	0.983422
1.64807	2.03096	0.917621
1.50541	1.78016	0.951971
2.2681	2.48219	1.01734
0.965622	1.39646	0.766134
2.76661	2.73842	1.09509
1.78215	2.29745	0.852383
1.43575	1.74674	0.885203
1.72457	2.1268	0.89395
1.17151	1.59886	0.807426
1.99931	2.00295	1.10448
1.58521	1.96632	0.889755
2.24618	2.685	0.909337
1.54287	1.94482	0.882012
1.64782	1.97803	0.922749
2.66243	2.65304	1.10457
1.72215	1.89801	1.01355
2.47345	2.64933	1.03237
2.17875	2.65023	0.900307
1.79175	2.05789	0.95996
2.43054	2.70481	0.983387
1.85671	2.15425	0.945331
1.79589	1.90941	1.03909
2.66673	2.66895	1.08877
1.94765	2.02835	1.04462
2.0557	2.44549	0.920048
2.13253	2.5062	0.931834
1.9189	2.07308	1.02762
1.37989	1.60582	0.9261
2.18013	2.59827	0.908022
1.49747	1.82393	0.961676
1.88517	2.03302	1.06384
2.27171	2.46319	1.01431
2.09854	2.58434	0.882976
1.71499	1.84777	1.02487
1.50351	1.75996	0.965627
1.80891	2.03114	1.00027
1.47986	1.76296	0.957917
1.54545	1.91295	0.933309
1.37268	1.66962	0.955612
1.93973	2.16125	1.0002
1.65963	1.87775	1.01517
1.39132	1.61764	0.959234
2.29002	2.9139	0.880781
1.99409	2.37198	0.919476
1.46517	1.84395	0.980913
1.69233	2.06171	0.902088
1.40299	1.71771	0.940882
1.4673	1.64901	1.00178
1.38118	1.64089	0.911512
1.84646	2.11148	0.967114
1.5748	1.80676	0.98688
1.57109	1.79947	0.980561
1.84699	1.98085	1.02626
2.08355	2.44251	0.902237
2.20879	2.42049	0.999684
1.59127	1.8515	0.970047
1.38562	1.73892	0.881078
1.1159	1.60447	0.827219
1.66915	2.00772	0.964672
1.1504	1.33441	0.947096
2.55792	2.59995	1.07375
2.43193	2.40622	1.11633
1.31339	1.63984	0.956499
2.2048	2.26605	1.07186
1.41523	1.72653	0.918707
1.94575	2.062	1.04261
1.91092	2.48096	0.868148
1.91777	2.34011	0.904744
2.21015	2.58068	1.02154
1.70037	1.86609	1.00822
2.26238	2.32359	1.09351
1.78124	2.11922	0.922687
1.82052	2.23407	0.921005
2.10564	2.25224	1.02298
1.97927	2.18768	1.02868
1.84749	2.01858	1.02089
1.91786	2.19587	0.955385
1.71844	1.97758	0.961795
1.66536	2.00938	0.965961
1.84958	2.17407	0.954476
1.74449	2.08978	0.942333
1.76914	1.94776	0.987271
1.21773	1.66865	0.810434
1.75277	2.02599	0.995998
2.04908	2.13702	1.05864
1.95356	2.07416	1.04892
1.83334	1.99837	1.00604
1.44955	1.78484	0.901238
1.52725	1.76226	0.944228
2.08402	2.18977	1.04552
1.31118	1.51139	1.01821
1.49936	1.76658	0.954591
2.31527	2.76367	0.906372
1.49718	2.01338	0.833392
1.73472	1.94493	0.97755
1.24535	1.66061	0.826876
1.59305	2.06546	0.857587
1.39395	1.69944	0.903956
1.88279	2.22035	0.964078
1.25522	1.70181	0.806982
1.22191	1.65609	0.823613
1.56132	1.86952	0.923173
1.6746	1.94067	0.955969
2.33053	2.45462	1.03955
2.2891	2.69722	0.918086
1.39786	1.64976	0.922611
1.12058	1.41599	0.916769
2.1999	2.55046	0.940684
0.946737	1.34301	0.781925
2.81766	2.95723	1.03293
1.56084	2.15775	0.793726
1.5289	1.942	0.856523
1.66125	2.12231	0.864413
1.42706	1.96542	0.792575
1.52298	1.95003	0.856497
1.45176	1.88012	0.841252
1.82192	1.95952	1.01844
1.78023	2.09099	0.974699
1.5569	1.74655	1.02379
1.7431	2.02564	0.945002
1.77262	1.96912	0.999042
1.1766	1.40037	0.934371
1.52435	1.82187	0.952266
1.18781	1.52748	0.862714
1.3819	1.65809	0.949295
1.4249	1.56591	0.989781
1.75944	2.15869	0.901024
1.28635	1.3918	1.02391
1.26265	1.83541	0.755199
1.60651	1.96621	0.920607
1.48715	1.728	0.940747
1.36408	1.70993	0.937652
2.26232	2.38882	1.0387
1.18631	1.49917	0.905729
2.11797	2.44422	0.946889
2.5177	2.74391	1.00141
2.08995	2.61558	0.905918
1.78365	1.95615	1.03006
1.62377	1.93794	0.928747
1.91006	2.12786	1.04201
1.64357	2.10168	0.857856
1.62561	1.78329	1.02127
2.03661	2.36233	0.944382
1.46051	1.86168	0.907198
2.06858	2.22799	1.01489
1.70344	2.09494	0.895248
1.91099	2.29314	0.914255
1.15467	1.43924	0.919471
2.22161	2.45149	0.995245
1.63658	2.03834	0.887975
1.70171	1.92993	0.956196
1.69284	2.05915	0.904377
1.87255	2.135	0.964081
1.43146	1.61883	0.969215
1.68261	2.06965	0.893424
1.29654	1.74414	0.858321
1.26886	1.53413	0.939258
1.67623	1.93532	0.923087
1.75394	1.78476	1.07835
1.50406	1.81715	0.905456
1.78709	2.164	0.95191
1.64203	1.98417	0.985279
1.87143	2.32564	0.891423
1.12318	1.59746	0.779459
1.63094	1.97069	0.917472
1.45163	1.81998	0.888892
1.42921	1.62571	0.973382
1.70052	1.97521	0.95459
1.0966	1.51952	0.797196
1.43622	1.63608	0.968761
1.79818	2.13738	0.931801
2.14658	2.28381	1.04685
1.41181	1.57799	0.981568
1.59313	1.83684	0.962276
1.61021	1.99732	0.939922
1.69154	2.03498	0.933234
2.03504	2.37684	0.947043
1.87835	1.99552	1.04782
1.1479	1.36172	0.941917
1.90851	2.30487	0.920971
1.77805	1.89327	1.03474
2.42877	2.52465	1.06434
2.40458	2.72278	0.970556
2.11003	2.40331	1.01573
1.25262	1.61893	0.914576
1.65443	2.00686	0.911359
1.72327	2.18767	0.88292
2.46974	2.92511	0.925688
1.69552	2.01781	0.927504
1.75321	2.06912	0.922071
1.44906	1.78434	0.929926
1.55712	1.97174	0.869704
2.21571	2.62451	0.929187
1.85793	2.23127	0.931134
1.47988	1.88635	0.906706
1.56472	2.00824	0.897759
2.11579	2.24061	1.03425
1.86879	2.00311	1.04785
1.81871	1.96707	1.01815
1.54072	2.02899	0.851318
2.35721	2.84166	0.893916
1.43951	1.68139	0.940337
1.70028	2.19894	0.848631
1.84239	2.27003	0.888779
1.93248	2.2078	0.957217
1.85299	2.2328	0.898401
1.45298	1.71272	0.950912
2.06137	2.3824	0.972868
1.61821	2.01409	0.891603
2.38227	2.55466	1.02585
1.98853	2.44444	0.899606
1.70427	2.47969	0.777665
1.3702	1.64136	0.913755
1.997	2.34183	0.941943
1.821	1.90093	1.07681
1.84685	2.41163	0.844956
2.44563	2.82768	0.943742
2.18968	2.59091	0.926377
1.98205	2.40141	0.898516
1.47336	1.70029	0.956869
1.2709	1.54379	0.917006
1.59006	1.76886	1.01292
1.38232	1.67861	0.954663
2.56147	2.76927	1.01437
1.90323	2.15312	1.0288
1.66385	2.1169	0.872069
2.44899	2.58837	1.00563
0.879387	1.1779	0.823097
1.06592	1.40777	0.83093
2.25389	2.53236	0.962913
1.71591	1.95224	0.948394
1.60373	1.9343	0.897925
2.30982	2.59034	0.971913
1.60847	1.74614	1.0902
2.92792	2.91354	1.12536
1.98716	2.28299	0.961203
2.04216	2.4827	0.909671
1.88626	2.01683	1.07608
1.79361	1.89837	1.00977
1.39863	1.67186	0.978189
1.33793	1.46326	1.01461
1.39288	1.49724	1.0268
1.33326	1.67505	0.905628
2.70605	2.65729	1.10981
2.32082	2.5675	0.982886
2.53398	2.67085	1.04855
1.86509	1.87416	1.07844
1.90804	2.15345	0.969422
1.89071	2.34446	0.879431
2.15694	2.4492	0.951803
1.63394	1.77047	1.06069
2.2493	2.52554	0.981176
1.83864	1.9312	1.07318
1.84354	1.77081	1.15024
1.50703	1.84774	0.905114
1.13872	1.46466	0.868382
1.46678	1.72355	1.00512
1.51887	1.7989	1.01219
1.34097	1.47549	1.02404
2.04963	2.38131	0.927323
2.33151	2.55458	0.991542
2.49626	2.66625	1.0324
2.04663	2.42644	0.916956
2.75082	3.1004	0.962647
1.3389	1.61014	0.914659
1.44205	1.67365	0.982082
1.53394	1.81351	0.932672
1.41706	1.72948	0.920338
1.83	2.07224	0.984876
1.95483	2.39445	0.958267
1.51553	1.64197	1.00439
1.54799	1.76446	0.955143
2.41236	2.51947	1.02531
1.16647	1.42505	0.905831
1.1215	1.40566	0.880467
2.51881	2.66545	1.05199
1.33404	1.63324	0.909107
1.62163	1.93921	0.912936
1.37175	1.61018	0.937281
1.61825	1.7495	1.02469
2.86923	2.98	1.05574
1.91676	2.41579	0.917177
2.34805	2.53144	1.0196
2.05484	2.69111	0.820996
2.76836	2.93473	1.02948
2.03184	2.60422	0.887633
1.79681	2.14531	1.01887
1.94292	2.05168	1.04201
1.46144	1.7551	0.972116
1.68116	1.87708	0.967286
1.43036	1.62416	0.964894
2.73026	2.86005	1.03953
1.19198	1.56582	0.890786
1.77313	1.7112	1.1475
1.3439	1.63286	0.967342
1.58732	2.01106	1.01163
1.28945	1.65785	0.888564
1.63153	1.85322	0.992122
2.60105	2.98714	0.948055
1.91869	2.03675	1.07534
1.2183	1.42331	1.01428
1.73306	2.06124	0.949955
1.02285	1.44478	0.812535
1.12665	1.45499	0.871001
1.00032	1.27219	0.894841
2.18245	2.63829	0.907369
1.86236	2.03499	1.02549
2.09715	2.32581	0.988886
1.84263	2.09759	0.967527
2.09337	2.43934	0.944146
1.74351	1.9368	0.994411
1.53856	1.7712	0.993193
1.92525	2.05992	1.03019
1.77811	1.88602	1.04247
1.59938	1.97161	0.895039
1.83198	1.93251	1.02891
1.68751	1.82876	1.00608
1.53069	1.74763	0.956745
1.4084	1.70266	0.913234
1.71178	2.09871	0.907319
1.47015	1.77224	0.934384
1.99263	2.45818	0.878155
1.14822	1.41517	0.890234
1.76807	2.20392	0.88817
1.37548	1.72463	0.928986
0.958842	1.31471	0.801585
2.04907	2.23658	1.00568
2.2749	2.39183	1.04721
1.50549	2.00235	0.827616
1.74985	2.12098	0.912631
1.52063	1.7288	1.02936
2.38408	2.36856	1.14002
1.8199	2.13126	0.932168
1.40181	1.69266	0.9255
2.02525	2.26958	0.989204
1.58696	1.84614	0.955768
1.39763	1.67969	0.912858
1.16535	1.45409	0.893548
2.27112	2.44436	1.07933
1.63809	2.09593	0.86151
1.65208	2.01115	0.908476
1.06822	1.40446	0.860916
1.96844	2.31023	0.939433
1.83095	2.23322	0.900182
1.56748	1.7781	0.997301
1.6218	1.95779	0.912851
1.59312	1.62432	1.06937
1.85944	2.04465	1.01426
1.02439	1.49754	0.751647
2.17327	2.30593	1.0518
1.22562	1.54347	0.891304
1.67225	1.83582	1.05365
0.983967	1.50078	0.745719
2.0955	2.2176	1.05849
2.24528	2.50901	0.971339
2.60965	2.71259	1.05513
1.4635	1.74292	0.915122
1.61089	1.93125	0.937815
1.7733	2.08464	0.950129
1.20304	1.53987	0.910147
1.28277	1.52091	0.924805
1.34054	1.62699	0.907882
1.72247	2.14366	0.875695
1.18289	1.46685	0.915555
1.74467	2.06745	0.923377
1.1694	1.62697	0.836693
1.26011	1.5419	0.902717
2.41208	2.65971	0.99242
1.99375	2.09817	1.04511
1.34515	1.64007	0.895724
2.08705	2.14856	1.07653
1.78751	2.02106	0.999513
1.41397	1.65752	0.937373
1.38077	1.52618	0.960541
1.17345	1.56315	0.856816
2.24376	2.48994	1.03697
1.56658	1.86607	0.934374
1.3498	1.57053	0.949466
1.40308	1.68316	0.938217
1.95334	2.34814	0.933858
1.9795	2.06223	1.06521
1.59374	2.0219	0.937817
1.624	1.83538	0.963536
1.77472	2.01524	0.971074
1.81681	1.72901	1.14061
0.931723	1.38082	0.776603
1.25101	1.67621	0.829378
1.36077	1.80624	0.830451
2.83681	2.79851	1.11261
2.03192	2.40312	0.928875
2.02691	2.40673	1.07318
1.48841	1.88835	0.882669
1.31325	1.98809	0.751184
1.53909	1.84576	0.918291
2.19196	2.30446	1.05326
1.27492	1.5064	0.931427
1.3336	1.77756	0.8337
2.4784	2.67616	1.02856
1.59215	1.79014	0.980949
1.24461	1.46021	0.944804
2.38588	2.76667	0.963174
1.93821	2.07635	1.04847
1.62885	1.76225	1.03189
1.36018	1.68572	0.906569
2.25019	2.32425	1.08289
1.37085	1.759	0.878046
1.32655	1.6311	0.894292
1.93661	2.0115	1.07694
2.05561	2.14564	1.07392
2.63102	2.65961	1.09964
1.61885	2.04767	0.882708
2.38948	2.45287	1.07609
1.5801	1.92078	0.905718
1.45115	1.82497	0.901342
1.16313	1.59241	0.840685
1.73747	2.02024	0.958972
1.78216	2.17644	0.962147
1.94474	2.0615	1.0396
2.17146	2.55853	0.934362
1.5313	1.96144	0.880479
1.66585	1.86809	0.993155
1.06284	1.3415	0.874956
1.67922	2.0305	0.913856
1.87298	2.22882	0.95507
1.48724	2.08599	0.785385
2.12127	2.32304	1.01664
0.929497	1.23014	0.816612
1.3035	1.59369	0.924865
2.07928	2.55285	0.882157
1.80905	2.1759	0.90053
1.49611	1.69323	0.983752
0.96839	1.50851	0.71309
2.28379	2.4873	1.02506
1.42672	1.89749	0.818029
2.09767	2.24348	1.04162
1.75897	1.96133	1.00027
1.16048	1.37712	0.957505
1.8769	2.25231	0.919775
1.48161	1.77878	0.951584
1.62058	1.83715	0.989872
2.12044	2.36798	1.00158
1.79927	1.9434	1.02726
1.25015	1.58843	0.880215
1.46346	1.55393	1.02322
1.64754	1.99113	0.931763
1.44078	1.81917	0.935082
2.10231	2.43337	0.948289
1.89953	2.16052	0.973287
1.60427	1.82902	0.965292
1.60006	2.08446	0.853169
1.59606	1.85056	0.964334
1.6621	1.89111	0.975184
2.25124	2.47724	0.999756
1.2466	1.54533	0.893586
1.47116	1.85268	0.923729
1.38735	1.75434	0.90339
1.90739	2.05741	1.03454
1.49674	1.80346	0.923676
1.37522	1.65777	0.913322
2.2632	2.47078	1.01461
1.94163	2.10901	1.02941
1.82658	1.96434	1.01273
2.63308	2.73706	1.05135
2.00434	2.23434	0.97425
1.37502	1.57274	0.965635
2.028	2.21145	0.998486
1.79616	2.05534	1.00839
1.69219	1.83053	1.03411
2.27141	2.38347	1.08102
1.83362	2.05291	0.994423
1.81376	1.94102	1.03981
2.0837	2.40686	0.942239
1.54894	1.68972	1.03379
1.428	1.63745	0.968821
1.72167	1.9782	0.961862
1.21252	1.5919	0.866329
2.56456	2.57104	1.07702
1.58578	1.98422	0.889414
1.33535	1.62776	0.921081
1.7701	1.92617	1.02313
1.15006	1.67914	0.819108
1.66515	1.96728	0.960946
1.86289	2.14336	0.975659
1.35586	1.51696	0.994204
1.61735	1.71678	1.0469
1.8781	1.98332	1.07398
1.57653	1.76396	1.02012
1.32681	1.76996	0.889692
1.2041	1.56127	0.887417
1.33067	1.76299	0.84044
1.88809	2.35454	0.923876
1.50843	1.88893	0.871032
1.59004	1.68569	1.03136
1.47092	1.82255	0.89349
1.71284	2.00431	0.953711
1.82777	2.2064	0.903348
2.01059	2.0771	1.07842
1.85698	2.26838	0.899986
1.92343	2.13169	0.994748
1.37642	1.45553	1.05842
2.09821	2.29671	1.00032
1.21429	1.56442	0.885813
1.5279	1.66329	1.0542
1.18567	1.49424	0.885693
1.29853	1.80699	0.797955
1.59748	1.81129	0.984814
1.87859	2.26604	0.914812
1.70113	2.19944	0.869474
1.33121	1.72219	0.861327
1.9446	2.20563	0.963416
2.46366	2.63933	1.02715
1.43535	1.78827	0.8915
1.84746	2.00927	1.02732
1.85242	1.84126	1.09727
1.98702	2.21913	0.994189
1.14984	1.43186	0.907871
2.24215	2.62084	0.93764
1.69439	1.90724	0.96046
1.74343	1.95189	0.985685
1.48592	1.65403	0.990223
1.13886	1.56396	0.820441
1.81025	2.00979	1.13723
1.65383	1.94751	0.92532
1.89032	2.28351	0.926547
2.07107	2.31323	0.992598
1.85486	2.27876	0.887015
1.16998	1.59847	0.838579
1.3989	1.81239	0.853672
1.5801	2.01579	0.865477
1.80004	2.14602	0.922844
2.04956	2.57549	0.872755
2.52452	2.95133	0.931075
2.72483	2.81188	1.0566
2.18298	2.2517	1.05642
2.18481	2.21245	1.08898
1.76184	2.23225	0.855991
1.606	1.88647	0.940788
1.16207	1.42717	0.893902
2.09161	2.13541	1.09906
1.96219	2.1378	1.00913
1.86625	2.27565	0.899345
2.0098	2.32185	0.947302
1.7453	2.18795	0.989249
1.89384	1.89954	1.16034
1.16261	1.63724	0.797087
1.71242	2.1228	0.918227
2.17009	2.49964	0.940357
2.29681	2.57938	0.962078
1.421	1.84777	0.854027
1.29233	1.65724	0.898787
1.17561	1.68658	0.776877
1.18409	1.51318	0.86432
2.15909	2.43869	0.998207
0.984672	1.5704	0.713291
1.92161	2.45949	0.860086
1.63664	1.8065	1.07002
1.35276	1.74496	0.871996
1.64823	1.85087	0.995163
1.31875	1.6045	0.961059
1.35145	1.69283	0.88827
1.74525	1.93766	0.990112
2.07308	2.32383	1.00273
1.61383	1.74406	1.06881
1.43796	1.87904	0.846914
1.58982	1.91549	0.94761
1.40493	1.83544	0.855165
1.44172	1.758	0.920714
1.95539	1.96044	1.11099
2.6092	2.78656	1.03398
1.39808	1.91617	0.802068
1.47597	1.84561	0.911107
1.95141	2.23295	0.961968
1.95104	2.32907	0.936639
1.72554	2.00816	0.939935
1.63919	1.7612	1.03005
1.80613	1.95676	1.03627
0.977683	1.45324	0.738893
1.31671	1.63424	0.896196
1.68475	1.96609	0.948668
1.16906	1.38842	0.94952
1.8918	1.98854	1.06751
1.44361	1.86916	0.913424
2.59896	2.52684	1.13701
2.1575	2.56805	1.01768
1.33716	2.00316	0.746322
1.12063	1.42625	0.858368
1.36651	1.78674	0.841486
1.81756	2.14114	0.981395
1.73106	1.9073	0.987367
2.50051	2.83743	0.973275
1.97785	2.15727	1.02684
1.34543	1.87573	0.792241
2.27719	2.37775	1.08087
1.84164	2.38065	0.865283
1.43561	1.61366	0.966193
1.32015	1.74046	0.873299
1.41121	1.83606	0.844575
1.15002	1.32282	0.956526
1.43957	1.68507	0.962485
1.50222	1.82542	0.923731
1.2609	1.79984	0.816205
1.50425	1.9569	0.911514
1.43724	1.83872	0.872855
1.94595	2.14873	0.998053
2.11883	2.29526	1.01556
1.33616	1.81665	0.82224
1.54322	1.96953	0.887546
2.02829	2.26244	0.967706
1.62612	1.94712	0.922655
2.02203	2.41152	0.91312
1.04932	1.34069	0.872121
1.60766	1.97602	0.892532
1.62249	1.90823	0.946441
2.26226	2.61722	0.964607
1.32428	1.49176	1.00277
2.22126	2.40854	1.02043
2.13489	2.22561	1.0639
1.44187	1.88244	0.848247
1.06746	1.41636	0.894697
2.79075	2.89704	1.0462
1.99108	2.41065	0.91304
2.26834	2.48188	1.00785
1.79506	2.07544	1.07476
2.15589	2.32704	1.03026
2.27589	2.32019	1.09117
2.46385	2.22506	1.21669
2.35103	2.52052	1.00593
2.19821	2.53162	0.963089
1.61988	2.13524	0.869988
1.82701	2.06502	1.02246
0.970859	1.37085	0.796753
1.72988	2.09039	0.920149
1.50748	2.03757	0.832264
3.47555	2.99013	1.26567
1.77105	2.28724	0.888436
1.85248	1.97607	1.03575
1.24828	1.50697	0.925594
2.14883	2.28554	1.04004
1.55826	1.9405	0.871458
1.88726	2.15641	0.961166
1.78738	2.19025	0.892266
2.05572	2.23411	1.01843
1.72715	1.97203	0.966062
2.27227	2.57342	0.953799
1.59133	2.14745	0.859299
2.12573	2.30635	1.02341
1.65186	1.93023	0.941534
2.42322	2.66764	0.986986
2.08724	2.04606	1.1583
2.40261	2.59763	1.01033
1.15043	1.44025	0.877829
1.7421	1.99535	1.03513
2.78696	3.10216	0.980175
2.04159	2.36447	0.953721
2.56798	2.67062	1.03933
1.84746	1.89259	1.10655
1.47916	1.77498	0.917884
2.0872	2.4068	0.95233
2.52536	2.87826	0.948578
2.1605	2.33546	1.01047
2.52552	2.85337	0.957513
1.89583	2.01842	1.05121
1.33965	1.76226	0.841167
1.26009	1.63215	0.932688
1.96705	2.48378	0.862241
1.48133	1.71856	0.968829
1.84571	2.22608	0.921599
1.84387	2.12185	1.00056
1.83423	1.88504	1.07932
2.14325	2.6747	0.866747
1.77589	2.1692	0.903715
1.21119	1.63654	0.85352
1.22972	1.58709	0.85512
1.87078	1.98772	1.03966
1.15527	1.5253	0.82587
1.86341	2.01903	1.05414
1.50165	1.95547	0.850894
1.27533	1.62403	0.890174
1.87301	2.03061	1.02987
1.82943	2.02738	1.01352
1.90832	2.24325	0.920922
1.47041	1.81832	0.914369
1.49329	1.83474	0.91986
1.15807	1.62629	0.817883
1.46993	1.79879	0.901523
1.46721	1.95146	0.844699
1.82421	2.19828	0.908825
1.7152	1.7098	1.11657
1.68962	2.08552	0.892469
1.26056	1.53092	0.923294
1.56088	1.83974	0.944636
1.79	1.72894	1.14436
1.44751	1.86088	0.853383
1.28646	1.60393	0.880273
1.6928	2.07403	0.920408
2.23558	2.57069	0.949904
1.69345	2.06235	0.896735
2.1399	2.1701	1.16221
2.00741	2.14542	1.06157
1.69003	2.09811	0.88641
1.81159	1.84613	1.09542
2.34795	2.67808	0.964911
1.82795	2.00281	1.01959
1.87964	2.07829	1.01943
1.52208	2.02556	0.835243
1.67383	1.8419	1.01705
1.52486	1.86296	0.89284
1.73271	2.02167	0.949605
1.56033	1.72983	0.99577
2.11523	2.47636	0.987874
2.02348	2.38217	0.922908
1.71435	1.96606	0.958659
1.7589	2.08888	0.928817
1.60419	1.90611	0.924204
1.54414	1.93483	1.00756
2.12842	2.50143	0.924402
1.3037	1.51594	0.946808
1.91256	2.18143	0.959935
1.54638	1.8255	0.94923
1.93251	2.34044	0.904434
1.18307	1.43664	0.912037
2.04406	2.15999	1.04641
1.77263	2.03096	0.980149
1.3276	1.4819	0.977861
2.38335	2.13609	1.24761
0.9822	1.344	0.808483
2.26257	2.55728	0.987447
1.50109	1.70046	0.997581
0.925467	1.47162	0.733288
2.00909	2.06677	1.07004
2.50992	2.5681	1.09186
2.00224	2.22456	0.986432
1.27476	1.60374	0.865374
2.03381	2.23695	1.13505
2.40294	2.53453	1.04491
1.33893	1.64493	0.905877
1.78316	1.96987	0.992289
1.20182	1.51532	0.869536
1.33227	1.83643	0.803791
1.28933	1.55997	0.90854
2.13372	2.40404	0.984463
1.45148	1.719	0.925998
1.38975	1.75616	0.872386
1.11402	1.43965	0.851048
1.23349	1.48661	0.95781
2.43714	2.74962	0.97939
1.14831	1.37836	0.930314
1.47378	1.80111	0.914843
1.44361	1.79189	0.898469
2.28578	2.28061	1.1147
2.26792	2.84919	0.882221
1.52871	1.85929	0.913765
1.26582	1.69123	0.866811
1.88363	2.1901	0.941537
1.97247	2.15353	1.01533
2.1637	2.47433	0.978283
1.71528	1.82235	1.03798
1.87954	2.07051	1.01284
1.37682	1.76738	0.869809
1.85618	2.01687	1.03847
1.6394	1.75318	1.04945
1.79395	2.06606	0.972287
2.43591	2.68684	0.99916
2.02578	2.20326	1.04712
1.87145	2.06634	1.01917
2.04341	2.12015	1.07954
1.86682	2.13064	0.974293
1.73171	2.01293	0.959108
1.23187	1.52423	0.908762
1.03509	1.54916	0.744049
0.97008	1.31139	0.831008
1.90748	2.23088	0.939346
1.64357	2.05179	0.887108
2.00382	2.35583	0.931957
1.61339	1.94252	0.909429
1.30906	1.61335	0.899503
0.918212	1.23916	0.813532
1.9504	1.97592	1.0829
1.23737	1.61709	0.91156
1.52042	1.7746	0.971135
1.66122	1.90496	0.971521
1.44732	1.57279	1.02269
1.43478	1.95024	0.811399
1.82822	2.15613	0.967124
2.08802	2.11767	1.06279
1.62417	1.88391	0.987031
2.16026	2.10796	1.13546
2.28033	2.33217	1.06805
1.49033	1.79651	0.921226
1.49308	1.68938	0.966607
1.90638	2.08499	1.02507
1.49817	1.89212	0.87842
1.90351	2.04435	1.01675
1.50522	1.89655	0.894574
1.59694	1.91773	0.928542
1.63157	2.01835	0.938973
1.68314	1.76134	1.03996
1.60417	1.96914	0.901714
1.6307	1.71577	1.0482
1.73954	1.93583	0.995459
1.98756	2.1065	1.05891
1.80531	1.94948	1.02369
1.63501	2.00835	0.906678
1.32386	1.63237	0.888947
1.95293	2.42586	0.883929
1.60173	2.02465	0.920946
1.34696	1.65025	0.92616
1.94067	1.96856	1.09303
1.33435	1.58097	0.925612
2.1867	2.4452	0.997398
1.71243	1.97384	1.0039
1.42204	1.70649	0.932648
1.43321	1.64173	0.977683
1.86693	1.89272	1.10731
1.3316	1.59097	0.967373
1.63425	2.07785	0.863694
1.26157	1.61183	0.862384
1.60472	1.97413	0.898896
1.81763	2.07652	0.976154
1.96154	2.07629	1.03046
1.62298	1.84328	1.00054
1.76495	1.73854	1.10789
1.49911	1.75916	1.01061
1.92435	2.15286	1.02826
1.81924	1.9423	0.995353
2.50686	2.68154	1.01344
1.41105	1.75515	0.91648
1.03502	1.34455	0.852727
1.32739	1.65711	0.895123
1.33103	1.67577	0.922701
1.81043	2.08715	0.960318
1.89266	2.18582	0.949085
2.91631	3.08067	1.03803
1.50245	1.63332	1.0214
1.38436	1.63903	0.962462
1.4474	1.64852	0.965044
1.54932	1.8743	0.909147
2.5052	2.73183	1.02613
1.57577	1.76197	0.9984
1.41279	1.59734	0.999734
2.31439	2.41779	1.05632
1.72608	2.04147	0.949219
2.5303	2.6651	1.05326
1.34714	1.59652	0.98824
1.31533	1.70001	0.891874
1.68555	1.99403	0.949489
1.57549	1.87665	0.9426
2.66537	2.94122	0.990167
1.48523	1.70276	0.96827
1.41996	1.65477	0.946119
2.15599	2.25478	1.10195
2.11221	2.19214	1.06864
2.54742	2.69127	1.04344
1.93687	1.9615	1.08428
1.50141	1.61482	1.00623
2.24692	2.81158	0.856972
2.46384	2.70359	0.991959
1.36772	1.60801	0.977988
1.22293	1.352	1.01076
1.89561	2.03508	1.06495
1.8318	1.97747	1.04151
2.27761	2.19696	1.13779
1.96998	2.19128	1.00147
2.35322	2.66226	0.966538
1.58221	1.74541	1.02301
1.65049	1.85474	1.01086
2.03184	2.157	1.06347
1.59652	1.8211	0.982981
1.47162	1.77982	0.9363
2.19118	1.97749	1.21139
1.86465	1.99911	1.08746
2.58859	2.65062	1.09812
1.59214	1.81369	0.973677
1.8293	2.18243	0.965472
2.01055	2.48025	0.894194
2.38524	2.80278	0.950053
2.04171	2.56568	0.873813
1.96752	2.43168	0.88923
1.67646	1.90754	1.03462
1.60756	1.81996	0.996659
1.74822	1.88823	1.00997
1.37951	1.62365	0.926212
1.33779	1.52261	0.988516
2.00412	2.04329	1.10944
2.04613	2.04384	1.1254
2.12407	2.51758	0.922866
1.28246	1.56657	0.926862
1.39173	1.69355	0.940641
2.35878	2.70637	0.953328
1.24922	1.5249	0.927487
1.15184	1.37894	0.92748
1.84388	1.79087	1.15362
1.73938	1.88483	1.06724
2.0559	2.33498	0.992498
1.53557	1.71447	1.01038
1.65458	1.86174	1.07535
2.2291	2.29107	1.0964
2.20707	2.26079	1.07449
1.82969	1.99353	1.0667
1.71615	1.83923	1.06416
1.71251	1.85058	1.04833
1.4971	1.67476	1.01593
2.11229	2.03357	1.24352
1.96211	1.8553	1.19642
1.41702	1.69237	0.929915
1.33538	1.61297	0.924408
2.38007	2.67045	0.984186
2.5932	2.67399	1.04899
1.47067	1.8049	0.909655
1.60709	1.98643	0.914393
1.78394	1.91211	1.06165
1.68766	1.82527	1.04416
2.31584	2.5654	0.994809
2.34922	2.39896	1.11075
2.28397	2.48185	1.02017
1.05391	1.38203	0.878569
1.4457	1.73319	0.945752
1.29119	1.69365	0.871176
1.48943	2.01774	0.830489
1.41671	1.59753	0.978211
1.35457	1.69754	0.917933
1.1828	1.52929	0.859592
1.61201	1.75478	1.00082
1.41231	1.53096	1.02596
2.1351	2.39075	0.98223
2.65021	2.90981	0.986553
1.40802	1.56733	0.994219
1.17472	1.45079	0.928876
1.6438	1.88258	1.00357
1.65427	1.87683	1.04862
2.5904	2.60612	1.07157
1.37758	1.40097	1.08121
1.68796	1.97938	0.969525
2.1351	2.28036	1.0349
1.63594	1.8121	1.00697
1.99365	2.39249	0.92025
2.20133	2.47469	1.01818
1.64459	2.11966	0.885404
1.4704	1.77831	0.922726
1.23068	1.61324	0.876069
1.14815	1.5856	0.83293
0.830143	1.32962	0.698147
1.89332	2.34308	0.894937
2.20575	2.59114	0.926148
1.41603	1.75779	0.897048
1.85341	2.3494	0.863987
1.19562	1.50336	0.888361
0.983202	1.33284	0.805509
1.05165	1.44686	0.840466
1.96819	2.1931	0.991651
2.0167	2.41947	0.912982
1.22062	1.54531	0.873054
1.787	2.44483	0.796204
0.968182	1.34287	0.802194
1.591	1.84566	0.955561
0.909408	1.2438	0.806373
1.99429	2.34988	0.934091
1.66967	1.7785	1.04226
1.29827	1.73985	0.84682
1.03885	1.43362	0.823117
1.33377	1.53925	0.940355
2.01653	2.20059	1.01481
2.13064	2.34413	0.987787
1.23726	1.68135	0.858139
1.65289	2.1512	0.838691
1.56011	1.92748	0.883118
1.20945	1.60682	0.877869
1.39822	1.81744	0.858746
2.12481	2.47221	0.949014
1.30674	1.54491	0.917974
1.47462	1.75553	0.941186
1.41397	1.61755	0.956373
2.59922	2.98206	0.941545
1.53545	1.83307	0.958295
1.71348	2.0053	0.953236
1.70507	2.00289	1.04548
1.33425	1.71957	0.864964
1.74265	2.10686	0.932785
2.06386	2.35289	0.963277
1.51123	1.84123	0.925665
1.88901	1.93612	1.06721
0.964344	1.35919	0.815456
1.86825	2.00062	1.02992
1.48342	1.7236	0.975363
1.48198	1.73893	0.948086
1.62887	1.91193	0.96928
2.2156	2.58064	0.958695
1.5226	1.72665	1.03033
1.57499	1.67795	1.04304
1.91762	2.09394	1.00711
2.04017	2.44072	0.922957
1.55835	1.93283	0.882767
1.6039	1.77653	1.00681
1.44233	1.78163	0.926674
1.6775	1.95026	0.991744
1.92885	2.12577	1.00411
1.70565	1.83731	1.02271
1.20843	1.63134	0.839892
1.29498	1.60233	0.954079
1.57688	1.8046	0.964615
1.41214	1.76127	0.948588
1.40652	1.55177	0.994553
1.35277	1.64366	0.89893
2.06441	2.34425	0.965117
1.14878	1.41039	0.945742
2.53823	2.55604	1.12291
1.9119	2.10511	0.976784
2.76353	2.91855	1.02573
1.12787	1.61336	0.769786
2.02231	2.55563	0.856169
2.78676	3.04625	1.02784
0.89032	1.26479	0.837999
1.72293	1.96111	0.978247
2.40903	2.7105	0.974749
0.965888	1.26922	0.832404
1.92724	1.99773	1.08111
1.86124	2.03918	1.0357
2.76743	2.94889	1.02348
1.25374	1.73965	0.816329
1.36741	1.66425	0.907533
1.73661	1.9207	0.984205
1.62065	1.99857	0.89662
1.01747	1.33039	0.832355
1.1182	1.376	0.893306
1.33786	1.71939	0.877939
1.75404	2.05418	0.953508
1.7772	2.16228	0.912204
1.1814	1.50127	0.88066
1.99438	2.51393	0.856102
1.35228	1.81106	0.824076
1.51995	2.00088	0.843573
1.51662	1.95119	0.865282
0.926739	1.3149	0.81725
1.1036	1.36774	0.883537
2.02219	2.27699	0.992947
2.12334	2.08422	1.12595
1.10571	1.4552	0.839657
1.62871	1.98663	0.9129
1.73931	1.96747	0.966316
1.4593	1.69329	0.991877
1.63925	1.65363	1.10432
1.26399	1.62478	0.893662
1.78979	2.26593	0.877204
1.38243	1.94438	0.881779
1.97831	2.29642	0.948761
1.5938	2.05512	0.871399
1.89795	2.19104	0.958787
1.04935	1.21385	0.955733
1.9383	2.22007	0.973038
1.80715	2.05535	1.00748
1.69267	1.97565	0.954766
2.19475	2.59566	0.929463
1.57269	1.95927	0.883943
1.28665	1.57767	0.906578
1.2667	1.57604	0.889412
1.86873	2.15682	0.959208
1.59871	1.78167	0.984782
1.8332	2.13498	0.955111
1.57297	2.07699	0.831223
1.48941	1.6747	0.996208
2.3526	2.69668	0.961116
1.8828	2.01235	1.04394
1.60488	1.85568	0.981544
1.06812	1.42771	0.828475
1.2572	1.58051	0.882688
1.80412	2.25921	0.87595
0.950432	1.28119	0.86425
1.73582	1.97988	0.980708
1.74794	2.15368	0.887339
0.975192	1.29177	0.806024
1.68612	1.94435	0.962582
1.27451	1.72505	0.813868
1.69892	2.14377	0.874096
1.35403	2.10037	0.715116
0.967615	1.37562	0.77583
1.59713	1.93725	0.894968
1.02243	1.45181	0.814717
2.14354	2.59888	0.898916
0.859124	1.30076	0.720662
1.24632	1.48417	0.918215
1.04972	1.47632	0.764011
1.67443	1.94606	0.990951
1.13698	1.5734	0.787319
1.72526	1.90728	1.00723
1.49716	1.85013	0.902024
1.61377	1.75389	1.01487
1.64014	1.81516	1.00066
1.00053	1.39301	0.800494
2.2109	2.42501	1.00197
2.65452	2.87596	0.999567
1.0097	1.43912	0.773554
2.22431	2.49571	0.973955
1.67373	2.0118	0.945467
1.4408	1.70142	0.955222
1.83113	2.0938	0.975194
1.78348	1.81416	1.10548
2.16104	2.62434	0.940874
2.30525	2.31724	1.09086
1.11229	1.48279	0.829973
2.13115	2.57233	0.897632
1.11183	1.42162	0.86772
1.91978	1.88894	1.11565
1.35225	1.62699	0.919074
1.59573	1.99859	0.922317
1.05096	1.38042	0.857577
1.45673	1.80431	0.889726
1.53237	1.88738	0.889169
1.04808	1.51406	0.775083
1.55118	1.89085	0.903807
1.37301	1.55604	0.978638
1.66407	2.14636	0.839878
1.69406	2.02675	0.925422
1.618	1.92161	0.925073
1.56599	1.75469	1.01
1.42478	1.90446	0.834379
1.6449	1.73513	1.063
1.81152	1.96997	1.01932
1.56147	1.76229	1.02442
0.948488	1.3774	0.762265
2.15507	2.30883	1.03244
1.88237	1.96758	1.06372
1.0393	1.44613	0.789905
1.87269	2.39674	0.851149
1.09237	1.50956	0.813775
1.30363	1.56762	0.909646
1.14293	1.48496	0.839397
1.74968	2.022	0.95798
1.49157	1.96281	0.865016
1.86998	2.35127	0.86701
1.46423	1.57238	1.05049
1.10458	1.39545	0.930629
1.46748	1.77834	0.915901
1.85629	2.28738	0.89421
2.13759	2.43506	0.950943
1.57131	1.7233	1.03428
1.78099	2.16442	0.9134
2.44184	2.84264	0.928329
1.87695	2.33088	0.897572
1.46481	1.72118	0.941606
1.52577	2.02224	0.834728
1.40285	1.57703	0.97816
1.81348	2.14467	0.940568
1.46918	1.92237	0.870786
1.22762	1.74808	0.779333
1.51605	1.66799	1.04855
1.59787	1.95635	0.895283
1.46666	1.78873	0.94812
2.61158	2.61319	1.10268
2.36828	2.53806	1.00638
2.18666	2.25836	1.04003
2.36706	2.84436	0.910973
1.83164	2.28316	0.891748
2.03566	2.25546	0.982454
2.05297	2.30519	0.982847
1.31193	1.74216	0.833438
1.59414	1.76679	1.0079
2.30819	2.58124	1.00446
2.42922	2.78463	0.965691
2.06596	2.25883	1.00301
1.38296	1.62134	0.952947
1.33631	1.69806	0.903165
1.26605	1.59042	0.919574
1.92594	2.29898	0.948555
1.65718	1.89983	0.992539
1.11614	1.4327	0.888718
1.35315	1.67433	0.889512
1.42483	1.71113	0.925748
1.8535	1.91912	1.09142
1.92353	2.0539	1.03753
1.19964	1.47661	0.890067
1.32897	1.61064	0.916332
1.24018	1.61659	0.864016
1.77651	1.99586	1.10819
1.47046	1.87203	0.856102
1.24365	1.43665	0.954188
1.95157	2.31792	0.96573
1.15015	1.52657	0.843031
1.24677	1.46023	0.977867
1.58131	1.85232	0.947272
1.03437	1.62397	0.693641
1.27082	1.38343	1.02075
1.28804	1.55376	0.921856
1.35208	1.59167	0.93366
1.42297	1.60251	0.95835
1.75006	1.86762	1.04455
2.04185	2.22635	0.990016
1.8723	2.09723	0.96541
1.7715	2.20172	0.884531
1.54763	1.8223	0.937502
1.55896	1.75698	0.994878
1.6923	2.1263	0.876669
1.71857	1.89295	1.01566
1.68161	1.98076	0.937149
1.30224	1.57128	0.910723
1.05386	1.56268	0.75508
1.82196	2.19383	0.911565
1.20962	1.49872	0.889551
1.45345	1.72436	0.946072
1.81577	2.06883	0.968714
1.64967	1.8896	0.958937
1.226	1.68368	0.823622
1.40377	1.75414	0.881615
1.72177	1.95398	0.966034
1.26939	1.71047	0.844876
1.34013	1.68533	0.878359
2.78091	3.05926	0.993073
1.49731	1.8495	0.955959
1.33236	1.62088	0.922348
1.31384	1.86704	0.895109
1.47722	1.77052	0.933675
1.98018	2.18857	1.00086
1.59874	1.81562	0.993027
1.90721	2.15562	0.967459
1.52071	1.71638	0.986707
1.24793	1.63426	0.848477
1.55868	1.9639	0.888
1.49017	1.86645	0.916511
1.82448	2.04598	0.976072
1.79849	2.17404	0.904546
1.15145	1.48012	0.891664
1.99671	2.08886	1.05903
1.98932	2.40133	0.929289
1.51664	1.88968	0.899239
1.24494	1.52773	0.953806
1.91022	2.29015	0.941297
2.01618	2.30898	0.96456
2.37195	2.66667	0.970751
1.42655	1.74592	0.914271
2.34505	2.49818	1.03529
1.02642	1.36783	0.830196
1.58205	1.95598	0.890658
2.11549	2.29154	1.00851
1.27533	1.64407	0.862172
1.34984	1.6249	0.913921
1.15295	1.47908	0.897065
2.36181	2.79575	0.925952
1.1027	1.51656	0.829877
1.30609	1.65107	0.910456
1.65325	1.89295	0.951952
1.48368	1.81351	0.942874
1.67077	1.88762	1.00436
1.78002	1.94192	1.03257
2.00509	2.57122	0.933664
1.71086	1.87976	1.01453
2.22085	2.44063	1.02124
1.32804	1.58551	0.93073
1.53012	1.66725	1.01527
1.60292	1.69738	1.0526
1.18767	1.54893	0.858284
1.38945	1.69247	0.91374
1.57092	2.00221	0.847818
1.41586	1.63563	0.984921
1.07321	1.46086	0.847693
1.72304	2.12666	0.899107
1.30762	1.61749	0.902363
1.18822	1.55161	0.836432
1.62954	2.1069	0.860698
0.898752	1.17931	0.867011
1.53836	1.95102	0.878555
1.09679	1.44791	0.829054
1.66223	2.01366	0.923539
1.84306	2.14946	0.98753
1.83175	2.20395	0.922068
1.53355	1.58688	1.06195
1.53174	1.68004	1.01588
1.81063	2.19675	0.888925
0.986443	1.45803	0.793536
1.87275	2.07422	1.03724
1.94975	2.02893	1.0885
1.46212	1.80335	0.890217
1.39383	1.65087	0.930863
1.87196	2.18562	0.95305
0.901527	1.20372	0.836203
1.70341	2.03067	0.97174
1.72983	2.07113	0.919938
1.38951	1.76053	0.938739
1.47903	1.77738	0.956158
2.03813	2.43372	0.927137
2.1063	2.45805	0.933445
1.49959	1.67847	0.977815
2.52172	2.60631	1.05985
2.90867	2.87137	1.09275
1.81248	2.07868	1.01883
1.78873	2.30202	0.870634
1.15094	1.49666	0.857937
1.91297	2.22951	0.960398
1.89642	2.20889	0.9524
1.25115	1.5693	0.876769
1.80254	2.06986	1.05774
1.37513	1.60012	0.967249
1.45139	1.74657	0.954212
1.3247	1.69095	0.865268
1.88692	2.12184	0.966453
1.61647	1.86865	0.978696
1.26158	1.68161	0.824184
1.03037	1.31519	0.855388
1.97317	2.09605	1.06415
1.84071	2.35629	0.870059
1.5481	1.87316	0.933858
2.78207	2.88921	1.07559
1.99005	2.18285	1.0135
1.19873	1.65499	0.799615
1.81453	2.1399	0.937381
2.32619	2.71064	0.951039
1.63523	1.68743	1.08404
1.38673	1.57715	0.97454
1.7195	2.20129	0.861304
1.94642	2.36533	0.899526
1.16151	1.62187	0.787786
1.97711	2.28528	0.990791
1.44207	1.83564	0.87998
1.62463	1.95235	0.947754
1.96274	2.03757	1.05575
2.51061	2.75422	1.01994
1.69278	2.0598	0.933928
1.41724	1.70076	0.935499
1.62629	1.91377	0.949974
1.5751	1.83126	0.960181
1.10435	1.36853	0.896453
1.08297	1.48381	0.805806
1.45684	1.69676	0.963266
1.67654	1.91557	0.977845
1.1142	1.56464	0.805749
1.79336	1.92456	1.04377
1.4522	1.84239	0.901578
1.75594	1.98871	0.990164
0.952384	1.2606	0.840192
1.37454	1.71268	0.905643
1.75423	2.39524	0.806935
1.24494	1.45581	0.944593
1.55497	1.78768	0.968746
1.66432	1.90967	0.999949
1.62908	1.81188	1.00329
1.71816	1.93152	0.984089
1.86904	1.98858	1.04335
1.39286	1.58065	0.973798
1.89734	2.23871	0.924108
1.25298	1.68677	0.831205
1.2947	1.66472	0.871848
2.0238	2.38029	0.916995
2.63177	2.99992	0.969207
1.5745	1.85607	0.972602
1.68458	1.82018	1.02439
1.5332	1.75922	0.979206
2.12816	2.33498	1.01294
1.30815	1.59038	0.944135
1.40699	1.74546	0.897121
2.30687	2.63218	0.95823
1.34167	1.77916	0.842674
1.45594	1.68831	0.950482
1.3958	1.67552	0.927067
1.38697	1.69128	0.93047
1.59648	1.8171	0.967309
2.26214	2.41381	1.04333
1.55125	1.71731	1.00316
1.65934	1.96865	0.946867
1.55977	1.69472	1.03824
1.3198	1.5052	1.00685
1.75992	2.12873	0.958185
1.60985	1.84411	0.988578
1.54007	1.78059	0.955055
1.66446	2.13233	0.895158
1.69706	1.97933	0.949603
1.97996	2.24319	1.00785
1.9543	2.10067	1.03737
2.03426	2.44599	0.921521
1.33637	1.85022	0.802053
1.37489	1.57698	0.977261
1.91825	2.22037	0.951813
1.78796	2.07868	0.953268
1.3671	1.75586	0.875199
1.69836	2.1328	0.872901
1.51279	1.8877	0.867422
1.40798	1.62614	0.987931
2.30158	2.47532	1.07214
1.55633	1.8001	0.98381
1.46359	1.77594	0.91574
1.95887	2.11837	1.04062
1.13769	1.66728	0.773292
2.09941	2.25866	1.02414
1.29402	1.83507	0.821178
1.55118	1.95658	0.876899
1.20457	1.63244	0.809314
1.33616	1.85274	0.833539
2.10202	2.47813	0.912956
1.44925	1.80565	0.885182
0.985172	1.4403	0.819336
1.79726	2.04638	0.973004
1.6359	1.69408	1.06856
1.48991	1.81314	0.950593
1.36477	1.90001	0.79617
1.49436	1.71975	1.00373
1.58021	1.91298	0.944656
1.68564	1.77528	1.03661
1.17663	1.54219	0.878076
1.65215	1.97144	0.92959
1.11411	1.46511	0.842611
1.36833	1.68225	0.905123
1.65406	1.80392	1.0593
2.02895	2.43713	0.908673
1.06034	1.51294	0.783656
2.45662	2.41269	1.10593
2.4732	2.76795	0.983715
1.8442	2.12625	0.959249
1.28045	1.70896	0.867421
1.74259	2.0365	0.948456
1.14157	1.53836	0.833502
1.70154	2.14221	0.893471
1.56826	1.81904	0.958159
1.57305	1.75136	1.05414
1.40264	1.40374	1.09084
2.02145	2.26111	0.981932
1.11118	1.49435	0.827756
2.03588	2.46461	0.912206
1.88475	2.19599	0.956014
2.84975	3.0027	1.04295
1.44479	1.88599	0.851631
1.34514	1.56713	0.953075
1.43616	1.80596	0.980673
1.3696	1.6538	0.94139
1.57223	1.93908	0.900893
1.522	1.84506	0.92795
2.11789	2.5101	0.952008
1.3325	1.57977	0.949461
1.14927	1.50231	0.843479
2.20331	2.44043	0.988413
2.13036	2.50617	0.931696
1.35415	1.65328	0.911546
1.23971	1.56356	0.869929
1.27938	1.64764	0.852051
1.43643	1.68534	0.962246
1.35527	1.77503	0.871601
1.42143	1.79019	0.878563
1.76323	1.9195	1.02706
1.91314	2.24796	0.932478
1.8338	2.04519	1.06768
1.38191	1.67472	0.916304
1.81401	2.29386	0.860998
2.11109	2.52997	0.923052
2.2575	2.72099	0.909501
2.2157	2.59264	0.938007
2.25204	2.45652	1.02195
2.1633	2.61593	0.894572
1.54214	1.78915	0.93566
1.09886	1.28454	0.928978
1.95604	2.06797	1.05267
1.84579	2.13167	0.975289
1.20996	1.57221	0.841191
2.15251	2.66704	0.885642
1.3964	1.85938	0.858526
1.46715	1.98816	0.81631
1.25983	1.50998	0.93828
1.50562	1.69627	0.994266
1.65453	1.92917	0.969215
1.20347	1.47485	0.904181
1.60216	2.22489	0.787056
2.47469	2.93253	0.92126
2.28488	2.57265	0.970536
1.94757	2.30818	0.934744
1.86936	2.32129	0.896911
1.96887	2.15948	1.03592
1.81126	2.01715	1.00752
1.59846	1.72465	1.0254
1.50854	1.7806	0.94139
1.39126	1.85855	0.827209
1.42729	1.80653	0.882858
1.50855	1.8132	0.97462
1.41257	1.69126	0.934329
1.56228	1.62915	1.08439
1.22928	1.81377	0.7505
1.21103	1.49147	0.912274
1.5458	1.64843	1.10645
1.56207	1.95875	0.909853
1.4943	1.92711	0.857535
1.25508	1.61312	0.912025
1.76336	2.0472	0.958419
1.35827	1.97054	0.775439
2.16326	2.55464	0.921518
1.53927	1.97446	0.87164
1.68765	1.95749	0.952112
2.0368	2.2054	1.02953
2.27264	2.60451	0.964292
1.65969	1.96996	0.928526
2.63038	2.74037	1.05192
1.87568	2.21259	0.943726
2.06149	2.2358	1.01996
2.56853	2.80586	0.993517
2.39219	2.61338	1.0002
2.0087	2.2666	0.979247
2.45258	2.71635	0.98231
2.69361	2.5417	1.16245
1.81247	2.38614	0.833349
1.84589	2.2793	0.909037
1.84241	2.19747	0.941289
1.75876	2.03551	0.947935
2.16189	2.30978	1.0423
1.09163	1.52222	0.795004
1.74706	2.07692	0.94626
1.15399	1.55271	0.82573
1.44073	1.96033	0.834398
1.98479	2.29103	1.00664
1.54618	1.96264	0.871008
2.27239	2.36518	1.08858
2.23356	2.39514	1.03966
1.06417	1.56819	0.74798
1.74453	1.89994	1.02338
1.28789	1.78825	0.780085
1.17318	1.60758	0.807241
1.97105	2.15785	1.05902
1.39049	1.65361	0.937566
2.55122	2.73255	1.04797
1.30451	1.74776	0.818325
2.52644	2.72125	1.01969
1.84279	1.98023	1.03789
1.73708	2.03411	0.961526
1.60096	1.92238	0.921329
1.34713	1.71877	0.922011
1.98465	2.25527	1.00272
2.02332	2.55921	0.90686
1.39784	1.93375	0.791544
1.58075	1.94771	0.89305
2.29386	2.49974	1.00876
1.48334	1.87109	0.900971
1.22411	1.74893	0.77838
1.42108	1.77375	0.902444
1.23765	1.66979	0.817975
2.48195	2.55495	1.08769
1.7683	2.10091	0.919705
1.44053	1.79591	0.890113
1.19028	1.71376	0.768073
1.69234	2.00551	0.934089
2.04159	2.38308	0.99115
1.44907	1.69164	0.950718
1.25309	1.75659	0.787821
1.65982	2.14865	0.859682
1.51861	1.9032	0.871418
1.34906	1.58965	0.96584
1.63173	1.8959	0.940609
1.3371	1.59139	0.924275
2.06208	2.23783	0.994026
2.4315	3.06265	0.865966
1.73207	1.97528	0.975642
1.19798	1.64703	0.848577
1.72865	2.06113	0.921466
2.02992	2.29254	0.959619
2.1169	2.22576	1.03231
1.8415	2.18971	0.92261
1.32565	1.53903	0.984477
1.21629	1.7298	0.782316
1.82706	2.15219	0.961537
2.04136	2.5168	0.874842
2.78996	2.89869	1.04305
2.20828	2.27954	1.07622
1.75484	1.75242	1.09857
1.90081	1.92199	1.08134
1.79069	1.94973	1.09086
2.9865	3.02577	1.06638
1.21885	1.48328	0.895068
1.17433	1.46839	0.884257
1.47528	1.80324	0.94535
1.26836	1.47568	0.996508
2.30481	2.50915	1.02538
1.61904	1.71321	1.0706
1.56314	1.7906	1.06362
2.43062	2.65672	0.995413
2.66698	2.71051	1.07082
2.53755	2.66182	1.04563
1.54902	1.70973	1.02864
1.7663	1.96487	1.01857
1.78314	1.96078	1.02943
1.42636	1.81878	0.914783
1.91969	2.06156	1.04251
1.61971	1.76836	1.03292
1.29698	1.64271	0.886619
1.36769	1.77831	0.944969
1.59524	1.77474	1.04828
1.51575	1.66739	1.03231
1.82354	1.95768	1.05887
1.78236	1.91639	1.07979
1.4987	1.77896	0.972592
1.47981	1.70952	0.955045
1.43536	1.65135	0.949392
1.18825	1.47815	0.891623
2.73237	2.85338	1.04991
2.6307	2.91376	0.984926
1.21987	1.44124	0.934988
1.28279	1.64249	0.935794
1.43697	1.71466	0.934393
1.60487	2.03057	0.875537
2.7842	2.91472	1.02935
2.49665	2.6655	1.06616
2.4184	2.47488	1.08499
1.32681	1.62317	0.944395
1.40207	1.69647	0.969709
1.9628	2.09623	1.04467
1.58888	2.0115	0.912655
1.54092	1.728	1.03216
1.74269	1.92778	1.07846
2.52569	2.43156	1.18459
1.9227	2.06798	1.07483
1.48017	1.78094	0.9422
1.39576	1.76795	0.881466
1.76825	1.74433	1.12804
2.12102	2.02924	1.17791
1.55405	1.83962	0.942698
1.47073	1.74201	0.953429
2.43456	2.65651	1.00409
1.85425	1.86	1.08414
1.83862	1.90178	1.05634
1.89489	2.02337	1.0399
1.28283	1.75149	0.930571
1.63199	1.92821	1.0104
1.75178	2.2648	0.835588
2.00842	2.19867	1.01439
1.86497	2.11057	1.02501
1.7854	2.01243	1.0117
1.56904	1.89867	0.929341
1.59704	1.8548	0.981326
1.51935	1.82454	0.979166
1.85438	2.14113	0.976816
1.67242	1.73642	1.06978
1.39683	1.61286	0.962121
1.32772	1.64461	0.877417
1.63064	1.90487	0.953091
1.31348	1.7147	0.866778
2.51337	2.785	0.991681
1.15188	1.59687	0.81094
2.00466	2.5036	0.874004
1.36503	1.83984	0.945762
1.3997	1.70183	0.972499
2.52707	2.87462	0.950874
2.63416	2.80604	1.03225
2.04709	2.54049	0.883659
1.36467	1.80311	0.851645
1.6257	1.70306	1.0917
2.64818	2.73432	1.05331
2.42553	2.73851	0.968482
1.56376	1.80535	0.957236
1.23765	1.61584	0.931843
1.57659	1.85052	0.951956
1.58495	2.03291	0.953141
1.30226	1.4541	0.954852
1.38547	1.62768	0.928787
2.65091	2.99413	0.966785
1.45245	1.72364	0.946751
1.30903	1.51712	0.981794
1.49653	1.60368	1.01877
1.68201	1.62529	1.12675
1.58353	1.68643	1.10107
1.71787	2.09148	0.942687
2.46398	2.64415	1.04238
2.50381	2.91505	0.92723
1.23145	1.49988	0.924823
2.47919	2.76842	0.983474
2.31609	2.44018	1.03902
2.39372	2.65686	0.980054
1.50628	1.70932	0.995455
1.79261	2.32101	0.837105
1.77681	2.1944	0.88149
2.04114	2.14392	1.03514
1.55132	1.92697	0.889673
1.26536	1.64444	0.870663
2.47302	2.98389	0.931316
1.12062	1.5212	0.814877
1.55714	2.00826	0.838646
1.23805	1.69255	0.81633
1.471	1.76562	0.935439
2.56671	2.84575	0.979513
1.36293	1.62677	0.930146
1.68217	2.00543	0.951521
2.02981	2.48057	0.949806
2.04512	2.12674	1.05282
1.57077	1.8145	0.952749
1.54073	1.76617	0.962149
2.01215	2.21347	0.995702
1.59888	1.84819	0.989468
1.93853	2.13398	1.00544
2.07543	2.20041	1.04134
1.32747	1.75988	0.843479
1.19898	1.41989	0.981008
1.49873	1.70418	0.989219
1.72232	1.81803	1.04135
1.46221	1.82532	0.887854
1.43659	1.64369	0.970303
1.30761	1.82957	0.79032
0.891136	1.34271	0.736327
1.39089	1.65972	0.954444
1.48719	1.62673	0.998253
1.38534	1.78161	0.859681
1.8057	1.99434	1.01949
1.17827	1.64402	0.799573
1.13797	1.53974	0.809841
1.32437	1.46776	0.993104
1.24265	1.62587	0.84938
1.91298	2.35148	0.905438
1.33991	1.61486	0.949288
1.40499	1.74349	0.88208
2.06335	2.35065	0.966476
2.02791	2.36383	0.946579
1.39264	1.83686	0.848395
1.2831	1.59256	0.900484
2.12872	2.50444	0.93862
1.55967	1.89571	0.915782
1.60362	1.74822	1.01926
1.81904	2.06404	0.997955
1.91228	2.19995	0.951885
2.18828	2.33915	1.04012
1.28945	1.84879	0.75893
1.51946	1.83628	0.924651
2.00999	2.23139	0.998956
2.10638	2.33038	1.01552
2.63921	2.93151	0.989371
1.9937	2.09234	1.05838
2.05235	2.18866	1.02547
1.80428	2.02317	0.985576
1.15071	1.46358	0.906605
1.85179	2.12526	0.957248
2.04203	2.24375	1.00901
1.31151	1.65288	0.921266
1.83335	2.10655	0.982882
1.23566	1.87522	0.775632
1.53363	1.98523	0.863359
1.84383	2.24911	0.960868
1.3874	1.8945	0.816088
2.19532	2.62542	0.911192
1.22853	1.50336	0.908471
1.70905	2.03002	0.921435
1.4989	1.99157	0.834428
1.61141	1.91196	0.924177
2.18064	2.83536	0.832251
1.73981	1.9405	0.992312
1.4372	1.88724	0.841198
1.76343	2.01782	0.967885
1.36847	1.63687	0.926236
2.03097	2.45847	0.915575
1.23776	1.70296	0.811003
2.24632	2.23611	1.11874
1.44936	2.03651	0.781558
1.80171	2.01252	0.990893
1.25868	1.58543	0.889215
1.17468	1.44735	0.899756
2.07198	2.38783	0.950033
1.24012	1.54904	0.887528
1.54584	1.76711	1.01275
1.27711	1.71437	0.833876
2.23111	2.20719	1.13274
1.81136	2.24848	0.877134
1.52305	1.84233	0.9208
1.59204	1.87173	0.988951
2.18998	2.18289	1.10585
1.39098	1.58009	0.976557
2.14314	2.4084	1.01456
1.96121	2.3535	0.918284
1.17775	1.55515	0.84709
[truncated: 763 more rows]

## Sheet: natwhyDox_thy
cell area	cell length	cell width		cell area mean:	1.5304		cell area std dev:	0.4411
2.79859	2.91697	1.05828		cell length mean:	1.8777		cell length std dev:	0.375
1.34292	1.52686	0.997238		cell width mean:	0.9011		cell width std dev:	0.1216
1.51233	1.77485	1.04327
1.24176	1.77947	0.798373
1.19433	1.55826	0.865984
1.43249	1.85216	0.893998		[h,p] = ttest2(cArea_wminus2, cArea_natwhyDoxthy, 'Vartype', 'unequal')
1.89966	2.16607	0.987529		h = 1 (rejects null hypothesis)
1.26435	1.69199	0.865985		p = 2.9464e-54
1.4079	1.87042	0.831063
1.22699	1.56471	0.871167		[h,p] = ttest2(cLng_wtminus2, cLng_natwhyDoxthy, 'Vartype', 'unequal')
1.40537	1.75749	0.897471		h = 1 (rejects null hypothesis)
2.19649	2.41373	1.00773		p = 1.2145e-31
1.70024	1.8966	1.00225
1.31071	1.59806	0.934613		[h,p] = ttest2(cWidth_wtminus2, cWidth_natwhyDoxthy, 'Vartype', 'unequal')
1.28229	1.67806	0.944772		h = 1 (rejects null hypothesis)
1.54733	1.96224	0.86755		p = 2.0354e-64
1.23084	1.85016	0.729631
1.70123	2.09844	0.899979
1.30085	1.72255	0.843165
2.12543	2.53057	0.976085
1.28059	1.95618	0.714049
1.15031	1.68173	0.747482
0.955891	1.35147	0.808447
1.30849	1.73627	0.833241
1.40429	1.9473	0.791215
1.18643	1.4948	0.885405
2.13466	2.20466	1.07791
2.14368	2.31562	1.03376
2.15706	2.27473	1.04845
0.89112	1.27507	0.75345
2.08706	2.19545	1.05756
0.823015	1.30554	0.684505
2.25347	2.45483	1.00745
1.24112	2.04032	0.680817
1.193	1.69034	0.790234
1.28683	1.83643	0.76734
1.1407	1.6879	0.733711
1.70294	2.28659	0.816317
2.35794	2.77783	0.933977
2.06008	2.5871	0.877121
2.18083	2.44992	0.974796
0.919606	1.39751	0.73516
0.846125	1.37834	0.680182
1.49495	2.15699	0.756436
2.19859	2.35177	1.03188
0.903412	1.44309	0.704726
1.52929	1.95438	0.891067
2.25883	2.43893	1.01592
1.7219	2.22598	0.844561
1.55812	1.97981	0.883711
1.75695	2.10277	0.945881
0.963175	1.55303	0.680769
2.3985	2.51652	1.0506
0.786575	1.42544	0.610969
1.38261	2.06275	0.739439
1.46891	1.79187	0.893747
1.11769	1.47119	0.860696
2.15431	2.54311	0.929202
2.63419	2.63782	1.10914
1.58512	2.09745	0.834111
1.1821	1.94748	0.657608
1.76887	2.10516	0.939889
1.50979	1.90562	0.925546
1.0522	1.51785	0.773355
1.39713	1.96988	0.779149
1.17099	1.88251	0.682796
1.24297	1.82536	0.750932
1.02858	1.66917	0.679159
1.00223	1.52328	0.759202
1.55879	2.00277	0.854825
1.64232	1.91545	0.9556
1.38921	2.22813	0.687832
2.16236	2.37641	0.993003
1.26969	1.96742	0.709259
2.53124	2.76171	1.00428
2.13346	2.4958	0.93279
1.33236	1.62317	0.920989
1.47662	1.90514	0.848394
1.93878	2.11973	1.0673
1.94103	2.18737	0.978456
1.50579	2.32377	0.700072
1.09721	1.7544	0.682027
1.99447	2.3413	0.949059
1.82356	2.04516	1.00132
2.03419	2.442	0.904007
0.955702	1.44716	0.725208
1.53686	2.16811	0.77429
1.65016	1.94152	0.937234
1.29543	2.18475	0.64675
1.4299	2.03071	0.782573
1.64129	2.10755	0.887301
2.14657	2.20131	1.08973
1.87947	2.03876	1.02898
1.02423	1.4087	0.811563
1.58552	1.89754	0.931447
1.67534	2.01467	0.940057
2.638	2.72488	1.06996
1.71009	2.06068	0.930554
1.63234	1.98579	0.913567
1.36048	1.81679	0.831843
1.57496	2.21247	0.781024
1.49551	1.93006	0.871606
1.67869	2.33377	0.803916
0.80474	1.34238	0.659108
1.75951	2.00828	0.972015
1.60074	2.19537	0.828046
1.48635	1.91598	0.888585
1.82476	2.19593	0.928373
2.01259	2.371	0.975469
2.09146	2.59319	0.872654
0.832468	1.15495	0.794474
1.15551	1.53703	0.896006
1.53063	1.79484	0.97894
0.913585	1.29475	0.772574
0.995763	1.62269	0.677639
1.28954	1.43871	0.99724
0.813397	1.22904	0.724029
1.27631	1.76602	0.804378
1.30728	1.79331	0.840118
1.49125	1.78787	0.927394
1.14648	1.53164	0.828982
1.78578	2.09589	0.946209
1.99622	2.34051	0.983034
1.18363	1.46157	0.905132
1.12552	1.51938	0.817993
1.40485	1.65805	0.964028
1.3601	1.68017	0.892298
0.905199	1.38298	0.762707
1.19344	1.60136	0.839045
1.51394	1.8057	0.943713
1.85608	2.09574	0.980307
1.01881	1.58678	0.715861
1.37255	1.76585	0.859401
0.995264	1.74237	0.63512
1.26918	1.58313	0.904031
1.17866	1.77544	0.746446
0.927477	1.46847	0.70001
1.24586	1.93457	0.70424
1.35144	1.5638	0.979109
2.54156	2.74885	1.02325
1.43647	1.93801	0.811659
1.21679	1.59018	0.853626
0.98812	1.42081	0.778547
2.16164	2.49623	0.951443
0.841298	1.31001	0.714436
1.19823	1.56857	0.84828
1.51944	1.83643	0.917852
1.01705	1.45298	0.80213
0.96211	1.5176	0.708583
1.87242	2.19657	0.946692
1.46576	2.0191	0.805879
1.52414	1.82429	0.934208
1.77228	2.0377	0.959975
1.59447	1.84478	0.974838
1.10073	1.50853	0.829007
1.48077	1.79522	0.906563
0.747059	1.19539	0.695823
1.12398	1.63347	0.752207
1.15613	1.56608	0.82036
1.02561	1.50032	0.750228
1.61691	1.90687	0.951729
1.08441	1.43163	0.942564
1.48281	1.89162	0.888901
1.96714	2.25508	0.953733
1.28206	1.68548	0.84557
1.90166	2.30777	0.908
1.79353	2.19698	0.897957
1.83828	2.15616	0.955565
1.68491	1.88035	1.01616
1.02749	1.6734	0.694143
1.22254	1.68887	0.807818
1.86178	2.28447	0.900863
1.77061	2.14474	0.917872
1.22229	1.62975	0.826835
1.28428	1.70741	0.836142
1.31848	1.63626	0.88211
1.45044	1.85153	0.869504
1.50235	1.92226	0.858472
1.60806	1.82079	0.969199
1.30281	1.7324	0.83253
2.19915	2.40801	1.04044
1.07735	1.76421	0.697591
1.24526	1.68618	0.831012
1.63046	1.93415	0.927165
0.989355	1.54997	0.709276
1.93057	2.13546	1.00444
1.01425	1.51219	0.731961
1.05604	1.46389	0.80966
1.32547	1.75573	0.839655
1.9234	2.18426	0.973776
1.50689	2.09214	0.800118
1.39779	1.88509	0.821642
1.22427	1.73599	0.77768
1.54368	1.80947	0.950124
1.20713	1.56404	0.853035
1.76014	2.09505	1.00957
1.69763	1.93461	1.01309
1.55005	1.71358	1.01
1.86555	1.98855	1.06432
1.35509	1.85235	0.842925
1.44074	2.31743	0.67948
1.24363	1.81003	0.749278
1.24715	1.69625	0.818373
1.71929	1.8437	1.03934
1.15614	1.78841	0.721025
1.45724	1.98199	0.805629
0.89892	1.37064	0.730928
1.06798	1.6437	0.715472
1.7196	2.02094	0.963921
1.35857	1.94594	0.76847
0.948684	1.37975	0.795126
1.57806	1.86238	0.946117
1.58581	1.94345	0.904143
1.61775	1.97514	0.910429
1.00295	1.43821	0.775195
1.89078	2.08988	1.00719
1.46671	1.87159	0.868875
1.51899	1.81585	0.938553
1.4902	1.89054	0.869004
1.09494	1.64759	0.733173
1.41316	1.74015	0.950815
1.0245	1.45343	0.792486
1.41721	1.75507	0.963754
1.41688	2.11618	0.744506
1.26598	1.69049	0.840977
0.960657	1.36556	0.769289
1.2875	1.56439	0.920242
1.31086	1.49752	0.970756
0.959577	1.5758	0.675439
1.7628	2.105	0.927678
1.21191	1.69772	0.844013
1.00433	1.63913	0.678139
1.84336	2.37655	0.850517
2.00409	2.25077	0.974115
0.815925	1.44375	0.63531
2.04816	2.30339	0.970875
1.41754	1.63673	0.957861
1.3795	2.05428	0.742899
2.08562	2.48033	0.926735
1.29829	1.86816	0.765407
1.04237	1.68018	0.677192
1.42793	1.58927	1.01534
1.57648	1.75366	1.06233
0.910632	1.67516	0.604189
1.85044	2.43337	0.830266
1.19305	2.03812	0.64548
0.887336	1.53912	0.63556
1.30344	1.67269	0.902701
0.931356	1.35395	0.770323
1.55261	2.15205	0.791468
1.09796	1.81038	0.655707
1.40804	1.57455	0.984442
1.55948	1.8739	0.926255
1.34906	2.04701	0.728838
1.30824	2.05715	0.730688
1.66834	2.05527	0.915808
1.19048	1.80202	0.731111
1.6832	2.32372	0.789539
1.24952	1.5129	0.920589
1.85538	2.26818	0.901133
1.67409	2.05744	0.903169
1.65757	1.88738	0.968782
2.53951	2.65778	1.0549
1.20708	1.87643	0.701253
2.02485	2.4488	0.915227
1.09075	1.81394	0.647915
1.64813	2.13544	0.849865
2.22453	2.63418	0.939615
1.5516	2.01988	0.859455
1.4695	1.93251	0.835071
1.62694	2.00225	0.905127
0.972326	1.54536	0.688702
2.66215	2.54056	1.15545
1.09698	1.58461	0.756992
1.64524	2.21658	0.803167
0.952121	1.51686	0.683643
1.47479	2.0026	0.813256
1.50544	1.83059	0.910631
1.76077	2.20274	0.896593
1.8493	2.21451	0.925687
1.83665	2.06071	0.971805
2.13982	2.36846	0.993621
0.93516	1.56594	0.657492
1.13774	1.77515	0.706529
1.20929	1.88636	0.707219
2.08777	2.17458	1.05249
2.5406	2.76795	1.00224
1.78434	2.17192	0.899618
2.39432	2.60651	1.02595
1.55102	2.32177	0.724566
1.59702	2.11571	0.831156
1.78504	2.19494	0.894037
1.61943	2.23964	0.790889
1.47849	2.19228	0.728612
1.58652	1.8356	0.943229
1.61006	2.1105	0.836165
1.46805	2.0699	0.782316
1.40962	1.8371	0.860583
1.47493	2.23922	0.725797
1.44493	1.96207	0.81222
2.48028	2.54774	1.06649
1.6621	2.16514	0.850624
2.04578	2.3034	0.987905
2.02122	2.26429	0.986659
1.20157	1.76521	0.745175
1.78357	1.97364	0.998281
1.74754	2.05706	0.946378
1.56745	2.06425	0.842762
1.54107	2.17344	0.785163
2.19832	2.39454	1.03217
1.56131	2.01317	0.864298
1.30326	1.76211	0.821052
1.0753	1.64119	0.719326
1.33639	1.7058	0.873616
1.67185	2.12027	0.861932
1.76554	2.0514	0.960345
2.0933	2.39573	0.974268
2.0124	2.20279	1.01382
2.30667	2.64376	0.978347
1.54834	2.1632	0.785842
1.68729	1.97308	0.945656
1.5533	1.88258	0.904948
1.80728	2.14101	0.950239
0.953956	1.56152	0.670476
1.03376	1.48651	0.797299
1.58019	1.98053	0.883853
1.77695	2.09295	0.942016
1.78943	2.21301	0.899404
1.78857	2.16723	0.908436
1.55469	1.83908	0.951554
1.06207	1.6493	0.708866
1.87874	2.10826	0.996655
1.74429	1.94017	1.00095
1.66002	2.32969	0.790699
1.13401	1.64742	0.76282
1.53996	1.7495	0.98264
1.85447	2.20654	0.922482
1.8073	2.08826	0.979239
1.71963	2.17459	0.876543
1.85243	2.03973	1.0268
1.16644	1.6827	0.765595
1.43736	1.75346	0.952185
1.4852	1.70921	0.978431
1.48073	1.68795	0.992733
1.01	1.55486	0.709078
1.0278	1.62981	0.686272
2.31163	2.64395	0.952619
1.11195	1.7029	0.728845
1.56229	1.72959	1.02828
1.26326	1.5869	0.918796
1.29826	1.54705	0.926533
1.42824	1.67846	0.946948
1.17117	1.5797	0.823641
1.33926	2.03427	0.723071
1.51177	1.77816	0.950197
1.41247	1.93423	0.794611
1.03034	1.44317	0.799256
0.775263	1.47347	0.575965
1.1431	1.7504	0.712287
1.11994	1.72096	0.712951
0.982525	1.69091	0.644976
1.39276	1.92835	0.799852
1.38894	1.82112	0.834513
0.955109	1.46501	0.722891
1.16302	1.87454	0.675641
1.5761	2.01771	0.865036
1.11106	1.92739	0.639582
0.892173	1.29431	0.747883
1.01465	1.54867	0.70697
1.86042	2.23439	0.94619
1.53179	2.0193	0.844729
1.7334	2.02519	0.952979
1.82856	2.13623	0.946979
0.942339	1.51997	0.678218
0.892586	1.39985	0.740973
1.24164	1.62983	0.851802
0.869532	1.24937	0.765796
1.28688	1.95648	0.727999
1.93245	2.37536	0.889097
1.02211	1.37377	0.812654
1.25109	1.72364	0.846556
1.1477	1.82169	0.695777
1.47239	1.85717	0.873834
1.4097	2.01524	0.80254
0.875579	1.26028	0.784625
1.0052	1.76327	0.619322
0.958564	1.5929	0.670188
1.14288	1.72001	0.745614
1.72061	2.23522	0.855163
1.05609	1.75616	0.663845
1.00082	1.48938	0.745118
1.31334	1.98571	0.732473
1.08046	1.40256	0.859782
1.22215	1.78772	0.799719
2.16561	2.45716	0.979066
0.98748	1.31467	0.834059
1.28602	1.80612	0.833698
2.76982	2.85222	1.0669
1.26251	1.57975	0.898671
1.93833	2.14723	1.00788
1.61389	1.92402	0.920024
1.55023	2.14101	0.795329
1.8288	2.22554	0.90346
0.853573	1.26196	0.787375
1.5675	1.91798	0.913232
1.08076	1.68459	0.713346
2.01328	2.3926	0.922412
1.00744	1.51887	0.729334
0.775678	1.10871	0.782311
1.31535	2.05713	0.755154
1.03412	1.614	0.717947
2.48815	2.66446	1.02614
1.44653	1.71598	0.96281
1.357	1.63319	0.925361
1.39237	2.01977	0.765342
2.27338	2.43891	1.08478
1.53573	2.09307	0.814343
0.88549	1.44016	0.672113
1.12165	1.5074	0.819426
0.814856	1.35565	0.672957
1.12298	1.50829	0.835819
1.2133	1.6217	0.83489
1.57717	2.09235	0.831666
1.22685	1.71534	0.804561
1.64027	2.14633	0.835943
1.46535	2.02954	0.801586
1.2952	1.82066	0.794447
1.35772	1.78208	0.852182
1.20513	1.84504	0.717243
0.8557	1.49494	0.620168
1.82524	2.09424	0.965801
1.4984	1.77875	0.955406
1.28171	1.92523	0.730382
1.9883	2.30956	0.941123
1.32332	2.03564	0.73195
2.56656	2.67864	1.06204
2.16121	2.38237	0.999549
1.24254	2.12587	0.636127
1.32904	1.88301	0.773319
1.61679	1.91308	0.919575
1.28491	1.72691	0.832013
1.31006	1.60211	0.921692
2.28459	2.50543	1.00906
2.00481	2.2874	0.964312
1.97754	2.28562	0.956068
1.59938	1.9193	0.992445
1.62693	2.09999	0.868597
1.07427	1.44805	0.814429
1.20228	1.86547	0.711188
2.65829	2.7874	1.06067
0.948334	1.50537	0.702189
0.778566	1.23655	0.674276
1.76193	2.08376	0.942461
0.810871	1.30248	0.677888
0.753413	1.19588	0.682703
1.20568	1.74355	0.75531
1.0411	1.64393	0.717628
1.06936	1.43613	0.901277
2.43885	2.59514	1.04076
1.16297	1.43637	0.8984
1.52667	2.25449	0.741558
1.73723	2.08312	0.926331
1.02149	1.40193	0.827685
1.6004	2.13312	0.815284
1.363	1.69146	0.885294
1.29478	2.13791	0.66223
1.56585	2.14617	0.801238
1.0352	1.52457	0.763322
2.24745	2.38025	1.04338
1.72464	2.25273	0.837929
2.233	2.45701	1.0241
1.22808	1.56126	0.867677
1.00816	1.49121	0.733399
2.1988	2.37992	1.03254
0.758537	1.32852	0.628485
2.41791	2.511	1.06604
1.48477	1.82764	0.90028
0.842781	1.39134	0.683744
1.81613	2.1726	0.958346
1.94436	1.97231	1.1055
1.01742	1.6026	0.689354
1.17199	1.75639	0.740996
1.1402	1.48963	0.933609
0.903916	1.548	0.643055
1.9678	2.33083	0.964901
1.12168	1.82494	0.668889
1.60516	1.88063	0.950261
1.15483	1.63632	0.775484
2.00971	2.13551	1.03664
1.42873	1.76266	0.917866
2.0565	2.2332	1.02411
1.96578	2.31591	0.943618
1.56543	1.90235	0.915076
1.20817	1.62396	0.822602
1.06331	1.4916	0.792918
1.48243	2.03664	0.800875
0.936368	1.41848	0.710699
2.02136	2.07028	1.07428
1.41137	2.01203	0.779215
1.53763	2.25378	0.752775
1.07687	1.57222	0.760659
1.97616	2.13564	1.03665
0.924478	1.56645	0.637766
1.80783	2.20334	0.900799
1.1262	2.01628	0.624178
1.08402	1.63943	0.732773
1.10949	1.6328	0.75025
0.849438	1.29469	0.723764
1.24367	1.74491	0.788582
0.919225	1.2937	0.774662
1.26791	1.95798	0.70874
1.17755	1.75962	0.759885
1.05412	1.58004	0.722091
0.952238	1.38635	0.766729
1.70354	2.15364	0.874344
1.02872	1.35966	0.829
1.26786	1.72186	0.808913
1.5676	1.76736	0.987977
1.02317	1.58346	0.702812
1.23507	1.73254	0.789718
1.37374	1.77161	0.872036
0.969908	1.51369	0.71137
0.945603	1.30689	0.823928
1.28013	1.82398	0.774645
1.34569	1.91453	0.77008
1.2928	1.97189	0.720191
1.10679	1.69508	0.726225
1.05436	1.61724	0.714768
1.26592	1.93768	0.719391
1.61746	1.88657	0.955263
1.25438	1.63125	0.855711
1.42331	2.02845	0.771831
1.8608	2.15969	0.963091
1.87891	2.08516	0.987139
1.35745	1.80637	0.826796
2.64406	3.00127	0.964822
0.927764	1.39425	0.772354
1.81302	2.0801	0.982314
1.03933	1.33158	0.86822
1.96106	2.20382	0.985923
1.34038	1.84188	0.802808
1.82457	2.04715	0.987074
1.58645	2.12377	0.822258
1.57601	1.68925	1.05929
1.54856	1.56367	1.08331
2.03513	2.66218	0.834318
1.29281	1.50068	0.955262
1.45624	1.65035	0.962602
1.4002	1.69727	0.976063
1.39168	1.57374	0.977019
1.16104	1.45759	0.884621
0.911763	1.34798	0.783946
1.083	1.44705	0.935925
1.19948	1.66168	0.856168
2.59921	2.90994	0.986841
2.56948	3.26078	0.86735
1.90035	2.42042	0.868579
1.80694	2.27431	0.871888
3.01263	3.15635	1.06454
2.40988	2.66026	1.00716
1.9896	2.07428	1.06993
1.30759	1.6359	0.907108
2.53009	2.76719	1.00474
2.31194	2.54872	0.996134
0.885051	1.28035	0.803517
0.894883	1.24406	0.793103
1.76282	1.84718	1.11401
1.55349	1.78897	1.02818
1.28637	1.60929	0.898991
1.28957	1.50562	0.973694
0.817605	1.27069	0.707957
0.672441	1.13365	0.653225
2.04508	2.32151	0.995111
1.19249	1.57625	0.834156
0.84933	1.20693	0.798812
2.49058	2.60532	1.0498
1.6148	1.97916	0.893304
1.59142	1.95632	0.896544
2.39075	2.74141	0.991524
1.51627	1.72678	1.04184
1.3976	1.77715	0.888674
2.50254	3.11376	0.906972
1.34605	1.56283	1.00527
1.2947	1.58652	0.928745
1.21712	1.49477	0.932453
1.89092	1.93506	1.09117
1.75483	1.95324	1.03111
2.224	2.66355	0.916468
0.683712	1.01107	0.741518
2.04966	2.45772	0.954919
1.20451	1.53244	0.897794
1.09215	1.42543	0.895552
1.09627	1.39333	0.859387
1.97256	2.55015	0.844479
2.39222	2.71153	0.98227
1.14445	1.35064	0.944229
1.29768	1.58233	0.921016
1.46605	1.86737	0.86668
1.7272	2.05463	0.928916
3.28716	3.35555	1.0646
1.17456	1.8951	0.669651
0.918635	1.54718	0.658376
1.21696	1.79859	0.751013
1.7508	2.08964	0.936193
1.75759	2.02513	0.965931
1.7443	1.88538	1.00457
1.51378	1.80591	0.940594
1.40739	1.68635	0.934019
1.43199	1.7746	0.890292
1.17226	1.85066	0.69328
1.46015	1.8012	0.915341
1.67158	1.87614	0.989625
1.52226	1.76021	0.9667
1.29754	1.57081	1.02911
1.3663	1.66243	0.991173
2.2052	2.60739	0.928511
1.27606	1.65605	0.853735
1.2072	1.64851	0.810673
1.31564	1.77641	0.819275
1.3921	1.81017	0.854484
1.27554	1.67412	0.841152
1.21556	1.58656	0.836677
2.01951	2.23778	1.01735
1.74016	1.89383	1.02101
1.92324	2.23273	0.947438
2.15656	2.51478	0.940845
1.19153	1.52087	0.894083
1.2819	1.67635	0.902824
1.61915	2.09259	0.881901
1.49045	1.82985	0.906552
1.30457	1.62375	0.912687
1.25107	1.59577	0.919296
0.732175	1.23251	0.687846
0.849951	1.13617	0.840448
1.55786	1.86372	0.914537
0.840983	1.27883	0.715973
0.593814	0.995619	0.646396
1.10315	1.55609	0.77464
0.920896	1.34134	0.751243
0.893373	1.29234	0.784473
0.953791	1.30321	0.826082
1.91588	2.41491	0.884562
1.22129	1.46211	0.920608
1.36851	1.567	0.957679
2.18307	2.45684	0.979571
1.18674	1.47415	0.972962
1.23296	1.45808	0.954759
2.24776	2.37477	1.07402
2.50976	2.79032	1.06384
2.3601	2.52469	1.05043
2.13304	2.26639	1.05256
1.03487	1.2808	0.877277
1.02301	1.50732	0.800055
1.61765	2.05873	0.876448
0.903731	1.39328	0.730842
0.849399	1.32521	0.703295
2.13876	2.54283	0.912248
1.14096	1.52616	0.826009
1.40297	1.8373	0.858527
2.62392	3.13472	0.916154
0.881401	1.41868	0.711438
0.85266	1.39118	0.68468
0.905005	1.23424	0.800839
0.663318	1.12485	0.727409
0.72631	1.06523	0.767057
0.783329	1.174	0.749409
1.57788	1.8006	1.00266
1.08302	1.37811	0.901048
2.34622	2.74119	0.944233
1.17958	1.51617	0.910473
1.34505	1.73755	0.910906
1.43597	1.79324	0.891813
1.32057	1.77089	0.855315
1.94097	2.65277	0.794762
1.30398	1.56983	0.934985
1.27291	1.62575	0.927842
0.954041	1.41968	0.736136
1.09191	1.55646	0.753922
0.848669	1.31217	0.707013
0.856032	1.32106	0.709358
0.829367	1.17481	0.790795
0.769846	1.19874	0.708221
1.31274	1.69829	0.893321
1.19436	1.42428	0.928682
2.40945	2.73141	0.967492
0.95148	1.25896	0.831026
1.05182	1.33935	0.881052
2.42511	2.56049	1.04252
2.2289	2.57122	0.975583
1.59245	1.90044	1.0301
1.7201	1.84378	1.07886
2.08335	2.39316	0.96124
1.2255	1.50015	0.908473
1.33078	1.55752	0.968894
1.27414	1.57843	0.930798
1.51257	1.64225	1.02866
1.6421	2.26651	0.795646
1.35758	1.75597	0.88193
0.855579	1.41098	0.676837
1.58472	1.79837	1.02677
1.40003	1.74047	0.886422
1.56568	1.88731	0.954752
1.22142	1.57309	0.856765
0.930623	1.49777	0.692726
1.2369	1.53528	0.924105
1.85968	2.31587	0.89218
1.65319	1.85901	1.00513
1.29662	1.63665	0.935358
1.56487	1.997	1.00115
1.17136	1.48176	0.86071
1.79003	2.09091	0.945553
1.62676	2.1062	0.904068
1.02459	1.52076	0.777771
2.09919	2.00362	1.17022
2.3628	2.30563	1.15318
0.875801	1.50221	0.645267
1.91287	2.17327	0.980645
2.14138	2.20266	1.04943
1.12231	1.48859	0.829874
1.4406	1.91917	0.895746
0.902209	1.28151	0.759837
1.20028	1.54811	0.852054
1.22052	1.50175	0.891062
1.34166	2.00476	0.731912
1.09302	1.49288	0.814538
1.93281	2.34771	0.903403
1.44774	1.69566	0.936619
1.47593	1.74891	0.938404
1.45603	1.70899	0.942817
1.00677	1.55821	0.712562
1.07889	1.53101	0.772097
1.26163	1.56108	0.869067
1.27572	1.69837	0.836935
1.57861	2.01379	0.864566
1.60677	2.00236	0.942338
1.20871	1.67985	0.790551
1.77142	2.08104	0.950721
1.74976	1.98788	1.01859
1.36136	1.67092	0.903959
1.47988	1.64699	1.01186
2.10966	2.10919	1.11094
1.63603	2.10882	0.859656
2.44505	2.38691	1.14266
1.15939	1.73368	0.738978
1.26738	1.89921	0.739372
1.43446	2.05649	0.77577
1.86423	1.98199	1.04599
0.985136	1.5326	0.705693
1.74405	1.91536	1.00618
1.13612	1.62445	0.759778
1.5431	1.78242	1.05981
1.83361	2.08545	1.01647
2.17363	2.38701	0.996485
1.74191	1.97145	0.992833
2.34326	2.43664	1.05104
1.81258	1.73754	1.14076
2.4153	2.40694	1.12353
1.99772	2.13213	1.0634
1.45807	2.10638	0.773976
1.5883	1.77202	1.01215
1.68699	1.67126	1.1182
2.19515	2.12998	1.16664
1.71662	1.82123	1.05891
1.62956	1.88448	0.957342
1.38746	1.4997	1.02888
1.57491	1.85122	0.95783
1.59878	2.16678	0.815187
2.07661	2.21254	1.04836
1.64162	1.83688	1.01136
1.21635	1.4669	0.98925
1.40976	1.72171	0.909975
2.70215	2.70525	1.08331
1.36589	1.82264	0.852003
1.96594	2.35163	0.924758
1.63265	1.81373	1.00068
2.1382	2.22621	1.06952
1.42198	1.72829	0.931987
1.55305	1.83142	0.944131
1.52284	1.74546	0.981821
1.43974	1.65615	1.02429
1.579	1.87878	0.930651
1.39072	1.78089	0.885682
1.46911	1.77115	0.929587
1.50489	1.84014	0.919408
2.01008	2.21826	1.01041
1.48236	1.79894	0.921502
1.22933	1.67008	0.827836
1.3053	1.71616	0.854488
1.36274	1.60078	0.950057
1.63273	1.84264	1.00395
1.27448	1.51058	0.979765
1.95939	2.01313	1.08492
1.47433	1.73959	0.943184
1.82079	1.8967	1.05589
1.1785	1.69257	0.785198
1.81751	2.09777	0.971372
1.46271	1.56135	1.04538
1.67207	1.95017	0.945826
1.23884	1.56318	0.947665
2.536	2.83454	0.995696
1.44114	1.80469	0.957587
1.41988	1.73	0.912746
1.83926	1.84775	1.10001
0.836528	1.39164	0.670733
1.23494	1.70973	0.815901
1.20937	1.67025	0.805922
1.66802	2.01072	0.921349
1.54157	1.81521	0.949176
1.12913	1.53682	0.853854
1.10061	1.40675	0.898467
1.6123	1.88226	1.03842
1.44787	1.76033	0.916985
2.05086	2.33899	0.966991
1.61207	1.99979	0.907102
1.25147	1.57375	0.88475
0.981561	1.38611	0.823885
0.796164	1.32771	0.659359
1.49839	1.7514	1.01703
1.38488	1.56387	1.01026
1.11414	1.53063	0.803345
1.19432	1.53363	0.877896
1.96012	2.13165	1.02793
1.59611	1.86029	0.951519
1.38172	1.91765	0.791446
2.1169	2.2131	1.06956
1.75963	2.1325	0.89713
1.54753	1.77618	0.978707
1.18312	1.70268	0.797047
1.1874	1.65978	0.814409
0.998751	1.54392	0.704776
1.4462	1.94259	0.824074
2.67596	3.06517	0.950963
1.51869	1.66135	1.02176
0.909351	1.4423	0.714243
1.07363	1.3268	0.913998
1.39734	1.70148	0.949446
1.66499	1.85843	0.994169
1.68889	2.16675	0.852875
1.10832	1.70413	0.728189
2.23603	2.63321	0.926313
2.02859	2.29414	0.98069
2.38456	2.59848	1.00036
1.86237	1.98312	1.08862
1.49348	2.21121	0.737328
0.883011	1.27094	0.761239
1.37244	1.6596	0.928967
1.18361	1.68013	0.785083
2.01085	2.34113	0.997938
1.14743	1.45601	0.911418
2.32089	2.53384	1.02545
2.23795	2.44177	1.02355
1.76223	2.38229	0.805055
1.97161	2.23031	0.992404
1.26242	1.75011	0.786578
2.8199	2.89245	1.0839
1.23857	1.58803	0.85092
2.91056	2.80355	1.14241
2.96913	2.85637	1.13389
0.926191	1.2508	0.854631
1.206	1.54385	0.909523
2.70269	2.56899	1.15374
2.44874	2.47273	1.08143
1.87405	1.96432	1.06123
1.88381	2.02237	1.04161
1.15288	1.43585	0.889126
1.3092	1.66032	0.908194
1.3359	1.90404	0.768442
1.97554	2.10015	1.02552
1.68068	2.33127	0.803408
2.52864	2.55631	1.09382
1.12957	1.38984	0.926847
1.51401	1.67582	1.03269
1.47513	1.82437	0.948779
0.99052	1.46979	0.752346
1.93787	2.21754	1.01307
2.11789	2.45634	0.951041
2.35123	2.51364	1.06341
1.38324	1.61744	0.942206
2.43146	2.47431	1.16257
2.72581	2.91496	1.02965
2.12802	2.18992	1.04796
1.45341	1.98596	0.832141
1.78406	2.17651	0.926646
1.6167	1.90698	0.94434
1.2014	1.63862	0.811051
1.23141	1.70441	0.801815
1.89346	1.98512	1.26605
1.56725	1.79289	0.99954
2.08923	2.07155	1.12614
1.35075	1.68614	0.910869
1.23908	1.52654	0.893289
1.79936	2.1924	0.902696
1.31343	1.68821	0.881569
1.27541	1.55004	0.911829
0.85211	1.33648	0.726234
1.3286	1.78884	0.834168
1.41995	1.74631	0.930955
0.896619	1.26715	0.805064
1.49385	1.8517	0.937543
1.66655	1.90473	0.990533
1.54151	1.98401	0.880618
1.04787	1.49189	0.814409
1.32573	1.94419	0.747909
1.39717	1.78063	0.903777
1.50209	1.98061	0.835504
1.53423	2.00483	0.848976
2.71769	2.7248	1.12224
0.83374	1.22566	0.791404
0.948278	1.40179	0.749815
1.56086	2.08618	0.856605
0.84018	1.50961	0.612554
1.10199	1.78459	0.675115
1.03913	1.60225	0.698557
1.50428	1.69627	0.990968
2.46033	2.70159	1.01231
2.44247	2.61646	1.0381
2.14218	2.19033	1.08692
1.91767	2.04632	1.09998
1.55708	2.04128	0.853281
2.85609	2.96997	1.06543
1.62774	1.74671	1.08365
2.79659	2.71132	1.14217
1.70304	1.82116	1.11139
3.07502	2.97254	1.1415
1.77111	2.02158	0.974934
1.84626	1.92527	1.0575
2.08197	2.16298	1.06199
1.24857	1.8243	0.746463
1.42286	1.87739	0.89422
1.89426	1.96855	1.06618
1.31006	1.56195	1.00643
1.60687	1.81503	0.971085
1.31763	1.70006	0.900457
1.9449	2.09653	1.02851
2.16642	2.18027	1.12602
1.56814	1.75879	0.990935
1.40159	1.7215	0.929004
1.90647	2.17663	1.03621
1.46317	1.63463	0.980408
1.37166	1.62968	0.965608
1.47922	1.81187	0.923569
1.92967	2.20622	0.963764
1.58111	1.93737	0.896431
2.69338	2.80503	1.06612
1.70552	1.83618	1.04632
1.30399	1.67929	0.869938
1.98103	2.18763	1.00313
1.72049	1.94247	0.997675
2.10787	2.27219	1.02716
1.70322	2.05477	0.915181
1.56842	1.77471	0.978124
1.62549	1.86844	1.01285
1.99338	2.28164	0.970426
1.83605	2.08327	0.98456
0.994368	1.52948	0.712299
1.86235	2.10113	1.00313
1.13027	1.4941	0.839308
1.1767	1.83982	0.708935
1.42477	1.80301	0.882793
1.4009	1.7197	0.919121
1.64756	1.98769	0.929287
1.74248	1.91443	1.0237
2.04166	2.20446	1.03044
2.41711	2.57299	1.03181
1.4381	1.77073	0.900892
1.06685	1.56095	0.755118
1.15093	1.54993	0.819719
1.30822	1.73825	0.846458
1.18138	1.55176	0.839241
1.36526	1.84086	0.843768
1.78679	2.20285	0.876161
1.19224	1.49303	0.889764
1.2935	1.50058	0.950266
1.14336	1.5797	0.801958
2.0657	2.0863	1.11059
1.56573	1.72119	1.06667
1.76483	2.00207	0.976221
1.93937	2.06897	1.04663
1.29017	1.59976	0.971523
1.10146	1.41858	0.863667
1.59148	1.81685	1.04669
1.65841	1.86363	1.00629
1.53542	1.7039	1.02377
1.8314	2.02751	1.05311
1.8332	2.028	1.03305
1.72572	1.84767	1.03768
1.24572	1.55158	0.948504
1.80303	2.32847	0.857688
1.86853	2.10032	1.01747
2.05924	2.43181	0.920811
1.46862	2.0649	0.786185
1.17832	1.63721	0.802568
1.1052	1.57674	0.757635
1.8083	1.90635	1.0557
2.35433	2.74596	0.940393
1.81516	1.95484	1.07674
1.14959	1.59847	0.82418
2.25017	2.38956	1.056
1.13409	1.41534	0.892095
1.49423	1.71617	0.964268
1.84375	1.96103	1.0537
1.55606	2.1018	0.812825
1.09109	1.43891	0.854157
1.48524	1.76422	0.95835
1.66692	1.66533	1.12152
1.06887	1.46406	0.856088
1.55034	1.78553	0.969953
1.85918	2.13356	0.965223
1.90084	2.04432	1.07557
1.38411	1.60717	0.949629
1.06599	1.50432	0.790738
1.51105	1.67596	0.989316
2.65125	2.76866	1.05318
1.48011	1.80154	0.946596
1.2015	1.57776	0.851053
1.52388	1.7609	0.975524
1.74915	2.31614	0.833419
1.16249	1.57412	0.815085
1.45763	1.63108	1.04059
1.48854	1.70512	0.978004
1.60006	1.84899	1.01228
1.4768	1.86434	0.886613
1.43724	1.70765	0.926796
1.7411	2.01872	1.03691
1.47353	1.77137	0.93794
1.74934	2.04022	0.969781
1.63244	2.0039	0.904897
1.66037	1.75558	1.04652
1.23852	1.84725	0.746537
1.7624	1.94133	0.999294
2.10514	2.42682	0.951984
0.891824	1.40202	0.727077
1.39857	1.58308	1.02419
1.61752	1.79336	1.06468
1.8079	2.4135	0.83162
1.25231	1.72949	0.79647
1.49393	1.73171	0.97568
2.77994	2.83316	1.08973
1.47981	2.04	0.801531
1.82431	1.89825	1.07251
1.56458	1.9734	0.886971
2.00762	2.07442	1.14335
1.17254	1.44032	1.06518
1.33934	1.61369	0.933765
1.20637	1.4617	0.961034
1.51037	1.84652	0.985086
1.6785	1.75567	1.06162
1.78178	1.9089	1.0479
2.10049	2.45767	0.988401
1.46568	1.81551	0.927068
1.4794	1.74768	1.02209
1.34298	1.85432	0.790615
1.22556	1.41664	0.996488
2.02655	2.18689	1.02241
1.82329	1.86448	1.09807
1.52551	1.89538	0.891672
2.20707	2.15701	1.14009
1.29126	1.48395	0.974164
1.63758	1.91017	0.949618
2.27309	2.43793	1.07132
1.36164	1.45372	1.03522
2.0459	2.14528	1.059
1.20819	1.57904	0.864565
1.5	2.10459	0.786072
1.72162	1.8931	1.03383
1.99866	2.30323	0.967644
1.89928	2.32092	0.928336
2.18106	2.31329	1.05018
1.69286	1.90584	1.00117
1.86096	2.08968	1.00908
1.99342	2.0903	1.06697
1.85476	2.10556	0.97144
1.42278	1.52856	1.0373
2.03148	2.26955	1.00661
2.05658	2.06657	1.09876
1.79555	1.95378	1.04073
1.09313	1.24768	1.02078
1.876	2.01788	1.0307
1.7036	2.16011	0.877481
1.13346	1.84609	0.685087
1.55977	1.74574	0.978845
1.47556	2.08392	0.783938
1.74944	2.13394	0.908869
2.23598	2.32656	1.09977
1.39281	1.69469	0.944034
1.16062	1.80426	0.700766
2.4061	2.6379	1.02095
2.06873	2.29751	1.00214
1.64012	1.88202	0.979713
1.90949	2.19019	0.958576
1.99523	2.27498	0.972506
1.85765	2.14881	0.960394
1.44924	1.8249	0.914075
0.873468	1.20262	0.806342
1.58323	1.74949	1.04151
1.88331	2.05182	1.06952
1.8961	2.27024	0.969639
1.98539	2.26507	0.973203
1.88818	1.97929	1.07991
1.46832	1.80648	0.907055
2.39904	2.48381	1.08352
1.45683	1.80015	0.903744
1.70538	2.00738	0.960414
1.51191	1.77522	0.953236
1.8602	2.19669	0.925943
1.71994	1.94551	0.989622
1.60864	1.87037	0.960282
2.00432	2.15566	1.02738
1.91365	2.03159	1.06953
1.83699	2.04506	1.01515
1.96125	2.18847	0.973456
1.78169	2.11088	0.944198
1.73649	1.94331	0.982775
1.27187	1.56485	0.885557
1.68242	1.95199	0.955823
2.03825	2.39797	0.972101
1.71158	1.8271	1.0479
1.8748	2.0538	1.01548
1.9261	2.11709	1.04295
2.15874	2.28419	1.05094
1.45006	1.84603	0.91581
1.63969	1.933	0.941649
1.53786	1.88275	0.929133
2.29822	2.35017	1.1393
1.3957	2.01232	0.76225
2.31321	2.50007	1.03991
2.05338	2.41562	0.959582
1.53818	1.92835	0.909663
2.21563	2.52753	0.967579
1.27126	1.80728	0.775959
1.47643	1.86984	0.914824
1.60923	2.0124	0.878772
1.61262	2.01286	0.891159
1.55956	1.82256	0.935401
1.56916	2.10971	0.816202
2.11575	2.50958	0.930536
1.61619	1.79174	0.996728
1.54145	1.90054	0.889421
1.78797	2.45465	0.794111
1.72502	2.13982	0.903657
1.61373	2.2322	0.788426
1.79173	2.23151	0.907217
2.20143	2.55388	0.961903
2.2135	2.51319	0.970296
2.00306	2.27242	0.970819
2.29656	2.63037	0.979037
1.45956	1.81943	0.895924
1.32707	1.67857	0.877148
2.26528	2.65722	0.9368
2.02116	2.25631	0.992346
1.88778	2.19114	0.952273
1.05866	1.63014	0.77365
2.01155	2.26024	0.984159
1.40056	1.64618	0.946212
2.11199	2.45617	0.94895
1.49202	1.86895	0.983253
2.36668	2.45456	1.06124
1.263	1.6126	0.870934
2.00071	2.49602	0.867309
1.30037	1.56656	0.93549
1.9477	2.41192	0.887163
1.15707	1.36111	0.943597
1.21263	1.71596	0.816235
2.32895	2.33488	1.09558
1.38449	1.94607	0.779221
1.4787	2.03963	0.804923
1.78277	2.36957	0.827287
1.27931	1.84701	0.7697
1.62664	2.09789	0.861884
1.59186	2.0304	0.872411
1.54761	2.05572	0.824417
1.897	2.19354	0.975227
1.38967	1.74327	0.89238
1.44898	1.96976	0.81393
1.22286	1.67925	0.80543
2.12488	2.38554	0.967512
1.85043	1.91756	1.13777
2.44337	2.54367	1.05615
2.35888	2.59566	1.00823
1.21744	1.63567	0.856657
1.47983	1.67359	1.02892
0.76812	1.27135	0.672321
1.03292	1.50264	0.768859
1.10332	1.49204	0.818752
1.04734	1.34547	0.862058
0.972227	1.34243	0.800844
1.11663	1.47749	0.828172
2.22283	2.23136	1.12687
2.20292	2.19827	1.1109
1.81632	1.90889	1.06851
1.85921	1.91188	1.07836
1.54026	1.81936	0.967431
1.78443	2.13554	0.94342
1.61886	2.02946	0.916488
2.1075	2.31464	1.01534
1.99894	2.4548	0.928283
1.66113	1.89247	1.03309
1.82241	1.90399	1.11012
1.89343	2.42487	0.855344
2.37074	2.49434	1.04339
2.04147	2.14949	1.12357
1.56502	1.71333	1.02956
1.5876	1.74866	0.998025
1.73041	1.83515	1.07104
1.4902	1.6999	1.01086
2.48765	2.7749	1.02231
2.47867	2.68504	1.02382
3.36079	3.18161	1.15449
0.819629	1.18196	0.769577
1.05122	1.53351	0.758856
1.15633	1.45198	0.887266
1.10943	1.39064	0.907995
1.91798	2.14273	1.01466
1.87055	2.06916	1.00785
1.53832	1.8516	0.920092
1.11995	1.52003	0.819534
1.0124	1.26859	0.890803
1.21715	1.51128	0.917904
1.29688	1.90613	0.749659
1.76698	1.76838	1.11108
1.62443	1.76413	1.05958
2.1315	1.89508	1.22834
1.76249	1.89975	1.16398
1.44856	1.73643	0.928168
1.37664	1.75509	0.882057
1.90178	2.09925	1.03186
1.68712	1.9087	0.985747
0.809568	1.21793	0.735911
1.04603	1.47305	0.793112
1.78905	2.16254	0.908921
1.07801	1.35707	0.884553
0.955052	1.35882	0.815113
1.07608	1.61768	0.766631
1.56517	1.76772	1.00927
1.77281	2.0135	1.04043
1.62436	1.91678	0.971548
1.87864	2.09564	1.04582
1.2281	1.47722	0.946032
1.14672	1.46946	0.921304
0.813708	1.23593	0.723073
0.802234	1.43893	0.631931
1.15612	1.48588	0.878701
1.58408	1.83512	0.975232
1.58686	1.74622	1.01077
1.45846	1.69584	0.957541
1.6297	1.80885	1.0567
1.57756	1.89854	0.991537
1.67077	1.97896	0.972172
2.02284	2.0819	1.08619
1.21556	1.47764	0.904355
1.16102	1.44088	0.888328
1.81476	1.81441	1.16558
1.75245	1.69646	1.13786
1.78494	1.9536	1.07495
2.22406	2.27212	1.1015
1.35864	1.56407	1.00462
1.69756	1.77536	1.07127
1.76246	2.03012	0.992124
1.00335	1.29977	0.87539
1.70926	1.95364	0.993713
1.61806	1.8833	0.95377
1.10518	1.38069	0.892301
1.05429	1.42937	0.817
0.888263	1.26225	0.780168
1.71258	2.02643	1.02023
1.69003	2.00457	1.00959
2.54333	2.69686	1.02381
1.39239	1.68565	0.947529
1.17206	1.4603	0.931981
1.01599	1.42179	0.811757
2.02308	2.22661	1.04454
2.17634	2.2715	1.0642
1.98851	2.01418	1.16055
1.96106	2.01944	1.08354
1.66293	1.92383	1.00934
1.7822	1.91037	1.06604
1.9393	2.17595	1.03671
2.12138	2.2206	1.07007
1.70197	1.9331	1.13292
1.76922	1.66921	1.20749
2.79782	2.65026	1.16284
1.93526	2.22423	0.952448
2.61098	2.57097	1.11313
2.31875	2.7423	0.972254
1.76295	1.74373	1.14281
1.15424	1.40566	1.03093
1.70069	2.01615	0.941725
1.45071	1.76934	0.921181
0.570027	1.08394	0.646525
0.75849	1.21533	0.675656
1.9039	2.00289	1.13177
1.93863	2.15959	1.05424
2.36768	2.52803	1.09155
1.07577	1.42005	0.851541
1.20293	1.70093	0.83401
2.57758	2.67486	1.10196
1.94281	2.03159	1.07006
1.61039	1.86636	0.957887
1.90934	2.09126	1.02095
1.86282	2.15405	0.973796
1.55043	1.99978	0.911336
1.9701	2.39291	0.912145
1.1405	1.50739	0.855198
1.18876	1.46925	0.894648
1.40858	1.72461	0.956815
1.32036	1.62701	0.90708
1.32286	1.60251	0.938599
2.14315	2.56369	0.912573
1.67788	1.75895	1.04353
1.06347	1.62115	0.796146
1.26422	1.63339	0.90806
1.52482	1.65164	1.01493
1.88304	2.04401	1.21354
1.98281	2.16968	1.02943
2.07897	2.27088	1.01263
1.83537	2.22121	0.914378
1.02024	1.32057	0.854254
1.27422	1.78624	0.861727
2.07642	2.03671	1.1719
2.04019	1.99972	1.19821
1.48036	1.81831	0.933906
1.50991	1.8215	0.924014
1.75513	1.81281	1.08825
1.63724	1.87694	1.12926
1.84763	2.03559	1.10065
2.12378	2.21211	1.10448
1.29985	1.6273	0.907808
1.19023	1.60806	0.838466
1.47021	1.75283	0.921787
1.15649	1.72637	0.805661
1.54341	1.58661	1.06864
1.12227	1.42448	0.939836
1.31321	1.83438	0.82539
1.24848	1.67903	0.831636
1.86676	2.2082	0.929733
1.03416	1.71887	0.668345
2.33951	2.68315	0.988724
1.2242	1.7309	0.785958
1.11776	1.69601	0.725389
1.90882	2.143	0.98308
1.04984	1.73922	0.665883
0.947767	1.42565	0.735212
1.64801	1.86196	1.01523
1.52569	1.80167	0.933485
2.5546	2.82051	0.994781
1.26984	1.63118	0.87702
1.34347	2.28372	0.640291
1.19891	1.57978	0.850976
1.04859	1.63855	0.699607
1.34532	2.04515	0.731799
0.992049	1.42753	0.77559
1.486	1.63715	1.06566
1.20762	1.82025	0.726307
1.49663	1.90791	0.862486
1.41874	1.72323	0.911118
1.49355	1.81888	0.918903
1.20305	1.76247	0.754219
1.64223	2.17017	0.8335
1.61949	2.16702	0.827761
0.85482	1.29117	0.73641
1.02662	1.39421	0.843394
2.37905	2.4778	1.06451
1.25189	1.71682	0.820587
1.02365	1.43305	0.842822
0.9733	1.5529	0.684699
0.868242	1.24886	0.788917
1.93319	2.19777	0.974339
2.30616	2.41985	1.03747
1.55492	2.03325	0.852485
1.59761	2.23648	0.775926
0.92191	1.31422	0.77048
1.02853	1.5738	0.723962
0.978676	1.4995	0.708069
1.67308	2.20298	0.84175
2.65147	2.59327	1.11824
1.27388	1.6188	0.871771
1.55649	2.01078	0.865426
1.63675	2.1917	0.820584
1.57693	1.96838	0.889023
1.36327	2.11734	0.697521
0.888741	1.39915	0.70924
1.34257	1.81929	0.822937
1.982	2.32168	0.949062
2.03954	2.18974	1.02629
1.3934	1.68381	0.928549
1.28746	1.83203	0.794237
1.05329	1.50478	0.790253
0.916993	1.41841	0.715918
2.25189	2.1705	1.14922
2.02613	2.18118	1.02426
0.953298	1.36313	0.784567
0.703847	1.30753	0.589959
1.14051	1.57823	0.822785
1.1034	1.37848	0.883677
0.931803	1.41767	0.735647
1.73228	2.44537	0.77706
0.941784	1.37122	0.784174
1.48849	1.8705	0.88002
1.02803	1.4653	0.777314
1.16652	1.54009	0.838453
0.876763	1.41072	0.691546
1.07075	1.70456	0.695628
1.6846	2.02076	0.922721
2.17373	2.40551	0.997856
2.37652	2.48734	1.06372
1.71636	2.04105	0.93593
1.90525	2.29472	0.913335
1.55122	1.81828	0.95304
2.21691	2.35481	1.05152
1.59176	1.85329	0.955412
1.45584	2.07967	0.763064
1.31394	1.82011	0.801232
1.29395	1.96969	0.722199
1.11128	1.49463	0.807426
1.60615	2.26588	0.782677
1.46443	1.93182	0.83155
1.44027	1.91156	0.82886
1.37361	1.66686	0.920219
1.43694	1.71319	0.937713
1.02393	1.49358	0.781482
1.40938	1.76962	0.894636
1.32538	1.93692	0.75304
1.36613	1.71269	0.916385
1.17056	1.65381	0.786707
1.34921	1.70694	0.885837
1.04474	1.58394	0.727931
1.07089	1.61962	0.728046
1.23542	1.49816	0.928651
1.44518	2.0335	0.790036
0.939557	1.38751	0.741541
1.01646	1.23611	0.925719
0.951708	1.25717	0.840191
0.820721	1.25324	0.72498
1.95987	2.07014	1.05099
2.40424	2.84578	0.924867
1.50185	2.09485	0.782927
1.45556	2.21931	0.721066
1.34229	1.71724	0.87811
0.902821	1.47949	0.676171
1.26625	1.51334	0.926936
1.72222	1.93444	0.990758
0.921431	1.55785	0.645713
1.69845	2.05828	0.914491
1.26314	1.82476	0.758493
0.846134	1.2417	0.791215
1.48914	1.92634	0.861937
1.91244	2.24948	0.935828
1.35448	2.07976	0.710666
1.02419	1.55805	0.731398
1.39629	1.78373	0.872299
1.03936	1.5854	0.71395
1.02348	1.27809	0.855113
1.1076	1.68829	0.719654
1.98831	2.15707	1.04948
1.57634	1.88185	1.01122
1.01337	1.29973	0.844557
1.26548	1.78569	0.79006
1.78483	2.02771	1.01478
1.12775	1.44298	0.891992
1.81241	2.2544	0.892958
1.01822	1.42303	0.794244
1.06281	1.55642	0.757357
1.63444	2.30908	0.77151
1.27252	1.82805	0.838167
1.31157	1.72069	0.852142
0.981244	1.51584	0.734188
1.54161	2.12573	0.803178
2.20464	2.63486	0.905555
1.7138	1.93095	0.980586
1.81107	2.12314	0.959007
1.34926	1.82873	0.853584
1.75503	2.03114	0.98455
1.29507	1.56383	0.904632
2.12647	2.23303	1.06557
0.950455	1.62862	0.643636
1.20301	1.76763	0.752375
1.74219	2.23717	0.867365
1.7557	2.22788	0.859537
0.83921	1.37893	0.67819
1.19795	1.52288	0.894583
1.65843	2.24133	0.802827
2.08922	2.45987	0.933208
0.979624	1.2967	0.874229
1.44497	2.10281	0.763974
1.59999	2.02739	0.875891
1.90895	2.11551	1.00136
1.18188	1.53648	0.865994
1.54053	2.0552	0.830145
1.63393	2.13146	0.826978
1.33434	1.98902	0.739783
2.4863	2.6472	1.02584
1.44635	2.13248	0.754911
1.32115	1.82084	0.789782
1.61069	1.93669	0.914614
1.66543	2.06293	0.894372
1.2002	1.59989	0.823632
1.15112	1.81938	0.702371
1.06067	1.42721	0.826558
1.38887	1.80238	0.876861
1.3469	1.8355	0.842686
1.69142	2.17567	0.871876
1.96238	2.39852	0.906514
0.823769	1.18469	0.786304
1.24536	1.76531	0.78682
1.05362	1.6051	0.785722
1.06298	1.60645	0.727375
1.52105	1.8513	0.921161
1.14104	1.39553	0.896847
1.24064	1.6058	0.852344
0.998226	1.33033	0.822119
1.69011	1.96675	0.951702
1.6436	2.03395	0.916198
1.14199	1.43397	0.879973
1.03341	1.38493	0.834392
1.7877	2.13903	0.924716
1.32341	1.80734	0.802635
1.32248	1.94509	0.745719
1.19054	1.76993	0.747055
1.42402	1.89113	0.825915
0.856309	1.34084	0.706302
1.20308	1.69312	0.800822
0.807239	1.44627	0.604719
1.15286	1.59195	0.806682
1.34452	1.79139	0.8258
1.56385	2.09674	0.819666
1.12013	1.44569	0.88215
1.32374	1.64415	0.87874
1.42218	2.18141	0.710368
2.44959	2.62951	1.02281
2.15716	2.37611	1.00222
1.49931	2.21691	0.734877
1.18543	1.80504	0.729967
1.47607	1.97715	0.8278
1.26353	1.84278	0.752244
0.994053	1.49843	0.731355
0.74473	1.13311	0.728425
1.76251	2.22513	0.878984
0.842547	1.34425	0.689147
1.14608	1.3544	0.935938
1.08897	1.43816	0.866987
0.889897	1.42103	0.746416
1.02615	1.61028	0.69761
1.22515	1.81323	0.7374
0.889949	1.24976	0.799342
0.975674	1.42758	0.762559
1.78355	1.98833	1.00284
1.81191	2.02706	1.00406
0.964016	1.48713	0.717372
1.36443	1.6094	0.933228
1.75037	1.97881	0.979835
0.98378	1.44418	0.770747
1.08995	1.47383	0.825793
1.22022	1.74947	0.787582
1.18525	1.72417	0.772451
1.16852	1.86608	0.678565
1.06167	1.67049	0.717399
1.56032	2.13471	0.794611
1.60079	2.07316	0.857654
2.00588	2.13412	1.05601
1.62179	1.88708	0.962984
1.00574	1.4101	0.802804
1.82288	2.11472	0.958754
1.17009	1.52979	0.873819
1.91274	2.39728	0.923341
1.20534	1.65467	0.798264
0.913206	1.28457	0.78714
1.97363	2.37249	0.913159
1.03089	1.55044	0.729509
1.11818	1.69912	0.731626
1.6119	1.92421	0.923268
0.946148	1.32156	0.778823
1.67654	2.01565	0.924436
2.1293	2.2687	1.03131
1.01084	1.61913	0.679751
1.49275	1.95634	0.831783
0.96408	1.43307	0.748958
1.97194	2.12548	1.04347
0.936756	1.50071	0.693018
0.961562	1.43082	0.749218
1.34413	1.80327	0.824373
1.41155	1.80669	0.859518
1.29127	1.62572	0.906518
2.2367	2.60169	0.936281
1.59211	2.17817	0.80999
1.26239	1.79056	0.763808
0.96193	1.76437	0.606968
1.59717	1.91064	0.930292
1.35279	1.78219	0.839598
1.33771	1.77802	0.837655
1.46308	1.95675	0.827676
1.28637	1.72364	0.873024
1.35106	1.88746	0.794653
1.86795	2.16632	0.956271
1.24308	1.62486	0.85258
1.03045	1.48304	0.759961
1.46916	1.75807	0.937749
0.829798	1.36174	0.680784
1.4113	1.7618	0.910667
1.68728	1.94604	0.959391
1.64434	2.20827	0.818743
1.66403	2.4992	0.727923
1.19568	1.50823	0.893005
0.939001	1.62548	0.63434
2.42851	2.66825	0.997784
1.52192	1.86594	0.900534
1.55489	1.87728	0.920995
1.55005	1.99689	0.853814
2.57426	2.61702	1.07194
1.33572	1.98722	0.738076
1.54727	1.75687	0.990271
1.37194	1.67697	0.913981
1.85532	2.2772	0.896794
1.45691	2.16611	0.737242
1.58832	2.10549	0.830523
1.40754	1.78914	0.880597
1.37863	1.68421	0.915039
1.71074	1.79565	1.13228
1.40047	1.77772	0.872738
1.29163	1.93097	0.730831
0.945584	1.7202	0.606472
1.164	1.65064	0.780025
1.50542	1.75968	0.951648
1.32958	1.6619	0.903141
1.60643	1.85056	0.983248
1.17108	1.74888	0.730926
2.14679	2.23068	1.07099
1.4851	1.74796	0.942861
1.45259	1.97429	0.813974
1.94202	2.51591	0.830887
1.83624	2.16054	0.944983
2.09945	2.23869	1.0366
2.02135	2.15694	1.04586
1.07201	1.39985	0.857551
1.57996	2.08102	0.839472
2.07013	2.3397	0.988518
2.12939	2.3287	1.02132
2.17968	2.42115	1.02496
2.05847	2.17317	1.06066
2.12541	2.30045	1.04163
1.61074	1.74963	1.02668
2.01696	2.24165	0.984584
1.8506	2.28967	0.876349
2.19857	2.48321	1.03162
1.32758	1.61937	0.936791
2.16487	2.26205	1.08497
1.29457	1.55936	0.919421
1.95005	2.12811	1.00358
1.89087	1.98806	1.05974
2.42765	2.56261	1.04178
1.19243	1.53801	0.864355
1.93679	2.15564	0.998961
2.21063	2.44213	1.07094
1.78828	2.21874	0.891508
2.25881	2.51093	0.998313
1.74672	2.08444	0.937736
1.87721	2.14949	0.970544
1.05677	1.60204	0.725993
1.62258	1.97034	0.92425
2.24372	2.40622	1.03808
1.30585	1.58622	0.907197
1.86557	2.52047	0.806328
1.79575	2.16206	0.923726
2.00544	2.22962	1.00662
1.16269	1.50321	0.851959
1.61014	1.83279	0.981408
2.26776	2.50764	1.02163
1.97456	2.17914	0.996196
1.07923	1.52541	0.787342
0.858371	1.24745	0.776257
1.88922	2.12826	0.984308
2.08183	2.3691	0.972642
1.13447	1.48564	0.834928
1.51797	1.78583	0.962223
1.53429	1.87628	0.917399
1.09009	1.80451	0.653536
0.938435	1.24993	0.825673
1.40035	1.85443	0.826906
1.04519	1.43982	0.808088
1.79547	2.20375	0.903448
1.27824	1.52862	0.927206
1.65769	1.70861	1.1109
1.40896	1.6461	0.957042
0.948946	1.43261	0.730071
1.50377	1.78939	0.930458
1.89425	2.33839	0.917931
1.21414	1.53222	0.878461
1.58106	2.04161	0.857955
1.61767	1.67813	1.06604
0.943621	1.46474	0.731409
1.30372	1.78659	0.807529
1.24296	1.66697	0.838542
1.12863	1.47632	0.845082
1.73912	1.90044	1.02522
2.61512	2.65649	1.09478
1.34202	1.86189	0.791492
1.23853	1.57347	0.868076
1.32027	1.58702	0.938279
2.12261	2.16102	1.08723
1.45104	1.53492	1.0388
1.93372	2.22428	0.965158
1.2779	1.65055	0.883679
2.13115	2.52631	0.927155
1.44957	1.67543	1.0049
1.22126	1.68293	0.799829
2.30048	2.64778	0.958368
1.76543	2.04027	0.973705
1.92882	2.21289	0.977236
1.19573	1.50252	0.890899
1.64762	1.66587	1.13278
1.38452	2.12726	0.708167
2.9292	2.99472	1.07436
1.76852	2.09544	0.932635
1.18989	1.4381	0.920236
1.8618	2.21358	0.928149
0.856325	1.2969	0.741092
0.949072	1.22348	0.910939
1.58748	1.92409	0.911539
1.88729	2.15562	0.966465
1.926	2.27135	0.947014
2.08186	2.36462	0.974716
2.00748	2.17653	1.03269
2.27983	2.22304	1.13624
1.64207	1.83405	0.987275
1.28154	1.92565	0.732599
1.11006	1.71022	0.721555
1.1924	1.48776	0.892389
0.872557	1.42794	0.664173
2.37243	2.63765	0.986232
1.83195	2.56062	0.775651
1.68138	2.11678	0.873048
1.22501	1.56771	0.859388
2.15939	2.21097	1.08931
1.97579	2.05441	1.09041
0.942804	1.21867	0.879417
1.72108	1.94786	0.973722
1.15115	1.42275	0.917207
1.0373	1.65251	0.693342
0.957174	1.37473	0.78066
1.34013	1.62287	0.991372
1.18489	1.69946	0.76649
1.82011	2.52872	0.822197
0.859751	1.3198	0.717654
1.25655	1.50885	0.949706
1.16809	1.58477	0.824846
1.14452	1.43165	0.94471
0.99557	1.49109	0.788329
1.24119	1.51187	0.90813
2.0894	2.14963	1.09121
0.883506	1.31071	0.740063
1.24641	1.48156	0.897265
0.988272	1.45758	0.76
0.945221	1.45656	0.753134
1.58597	2.0543	0.839529
1.9655	2.20648	0.979119
1.32361	1.73401	0.848469
1.90716	2.05638	1.01898
1.17342	1.5174	0.846755
1.71928	2.15943	0.881553
0.808091	1.25981	0.706665
0.782355	1.17922	0.729946
2.40251	2.70486	0.967178
0.989446	1.42211	0.826475
1.68001	1.78036	1.0364
1.32946	1.55143	0.97005
2.25051	2.56198	0.957225
0.807915	1.40601	0.642718
2.51065	2.60235	1.04343
1.54432	1.8623	0.939066
1.56569	1.94431	0.888028
1.43066	1.57309	1.00752
1.28323	1.57489	0.90181
1.42025	1.83035	0.851359
1.55442	2.02292	0.868438
1.33743	1.52447	0.966896
1.2524	1.52634	0.905169
1.83301	1.92674	1.09492
1.81113	2.15498	0.929771
1.16311	1.52824	0.854421
0.915584	1.30174	0.77271
1.82078	1.9592	1.01901
1.70428	1.84871	1.07887
1.12037	1.34389	0.940511
1.23225	1.4727	0.926872
1.55475	1.98804	0.870386
2.32734	2.54754	1.00542
1.98105	2.13154	1.08664
0.926957	1.32347	0.871801
1.25661	1.59412	0.880687
1.68232	1.83791	1.08442
1.30943	1.81973	0.955822
2.56548	2.78071	1.00644
1.29906	1.74418	0.937863
1.53402	1.7937	0.981377
1.12436	1.46255	0.872954
1.32728	1.81645	0.854099
1.96484	2.25468	0.962973
1.27426	1.58116	1.00391
2.56733	2.6991	1.04909
1.56572	1.83451	0.965366
1.69434	1.93506	0.979776
1.39759	1.57954	1.00526
1.17608	1.58348	0.881061
1.57479	1.81366	0.979681
1.09179	1.42928	0.854818
1.27638	1.80302	0.779564
1.50082	1.75756	0.997861
1.91456	2.20543	0.958281
0.988427	1.33069	0.836348
1.27852	1.65781	0.862221
1.35523	2.13613	0.691006
1.88711	1.95224	1.08555
1.04542	1.44819	0.81724
1.36656	2.00336	0.753882
1.41085	1.71413	0.956562
1.8517	1.91867	1.08488
1.03687	1.68631	0.684266
1.58701	2.06871	0.861338
1.95931	2.50962	0.852632
1.69421	1.86874	0.98724
1.47279	1.72103	0.952831
1.81175	1.99055	1.01303
1.41207	1.79368	0.893297
1.83431	1.90582	1.07652
1.15366	1.65736	0.781154
2.20764	2.66155	0.910543
1.18246	1.80488	0.722804
2.25528	2.58738	1.05488
1.02407	1.67473	0.672799
1.49464	1.92744	0.888203
2.23377	2.52649	0.978962
1.50284	1.75994	0.95098
1.70283	1.90333	1.02436
1.4608	1.95788	0.823948
1.27213	1.73285	0.861759
1.56761	1.97837	0.875326
1.57248	2.06263	0.842254
1.74041	1.88325	1.0653
1.54484	2.13632	0.81623
1.11914	1.43644	0.901842
1.31618	1.5258	0.971905
0.888264	1.28395	0.766967
0.862385	1.33224	0.726415
1.63598	1.82758	1.0051
1.45757	1.77506	0.92851
1.281	1.617	0.868263
1.96414	2.01915	1.09054
1.48247	1.69449	1.04261
1.82278	2.06753	0.977326
1.79525	1.95794	1.01312
1.49124	1.99891	0.818293
1.5646	1.89166	0.909452
2.19373	2.53652	0.947471
1.7611	2.16962	0.90148
1.29537	1.79	0.796132
1.98606	1.96389	1.11424
1.68755	1.95585	0.961233
1.94428	2.14918	0.990462
2.5669	2.80097	0.999555
2.16864	2.46946	0.97605
1.79693	1.93929	1.02136
2.08205	2.2996	0.997762
1.68012	1.84684	1.019
3.0731	2.87089	1.16305
1.72953	2.02422	0.989671
1.45029	1.94266	0.816788
1.61751	1.82913	0.995651
1.64696	1.9585	1.00262
1.48555	1.64091	1.05139
1.32747	1.67267	0.922425
1.53519	1.7614	0.98076
1.09678	1.36208	0.897669
1.40689	1.72554	0.912637
1.41317	1.70317	0.982276
1.53366	1.88542	0.921516
1.16819	1.58675	0.835822
1.1571	1.61928	0.787628
1.65086	2.02465	0.916356
1.42217	1.60491	1.03289
1.03019	1.46888	0.789114
1.65853	1.97818	0.973993
1.3691	1.6833	0.909264
1.61004	1.90301	0.938551
2.30579	2.66009	0.961721
1.39824	1.6185	0.946749
1.17288	1.66186	0.785588
1.24862	1.61793	0.873541
1.05924	1.45951	0.853504
1.21588	1.51559	0.917421
2.37638	2.52824	1.03383
1.54104	1.81574	0.974394
1.20823	1.53656	0.9045
1.21643	1.76884	0.757876
1.39104	2.00401	0.754514
1.35672	1.57014	1.01001
1.88832	2.35258	0.911901
1.20312	1.71258	0.786834
1.42019	1.65371	0.973596
2.40529	2.87439	0.931577
1.52211	1.78368	0.95697
1.35106	1.56231	0.953087
1.65622	1.9049	0.97118
1.11311	1.58856	0.766373
0.890772	1.30798	0.743922
2.57526	2.63983	1.13379
2.38341	2.55741	1.02176
1.41595	1.73748	0.910302
1.29934	1.71029	0.840453
1.51555	1.80246	0.935714
1.13159	1.56072	0.860987
1.36819	1.74104	0.880641
1.98085	2.25713	0.963202
1.57934	1.79247	1.0432
1.72942	2.26405	0.830737
1.93769	2.40457	0.902418
2.32988	2.6187	0.968223
2.08853	2.31464	0.999064
1.91582	2.29657	0.927274
2.3461	2.48985	1.05437
1.34393	1.85385	0.812808
1.41561	1.71429	0.929607
1.67716	1.90622	0.997341
1.5724	1.96207	0.910849
1.42405	1.74782	0.912872
2.12629	2.31679	1.02224
1.56579	1.91728	0.899306
1.50346	1.78593	0.94769
1.57285	1.81941	0.971416
1.09339	1.39814	0.878811
1.10841	1.42626	0.890827
0.843409	1.3273	0.724478
0.990488	1.33526	0.803101
1.51399	1.54797	1.08069
2.20368	2.16004	1.12186
1.23585	1.72205	0.802899
1.2748	1.93854	0.744516
1.17389	1.49275	0.951463
1.12663	1.44273	0.916071
1.31984	1.72627	0.915709
1.11555	1.44839	0.864386
1.84957	2.05716	1.00515
0.983791	1.46469	0.739307
0.909648	1.24852	0.784151
1.44891	1.87476	0.840936
1.34344	2.10816	0.690633
1.06678	1.63979	0.717297
1.59164	2.05523	0.868704
1.19263	1.55006	0.853997
0.806347	1.23256	0.716956
0.83148	1.3911	0.67065
0.919676	1.24774	0.816987
1.07881	1.62282	0.734415
1.13152	1.68722	0.748298
1.08621	1.42872	0.89504
1.04296	1.48982	0.826743
0.909739	1.29848	0.765849
0.982138	1.44037	0.760797
1.18138	1.57309	0.836147
1.04002	1.43143	0.804552
1.15414	1.53809	0.837368
1.02902	1.38907	0.871187
1.19868	1.48531	0.90594
1.07314	1.47552	0.835452
0.684813	1.10293	0.677666
0.614596	1.16687	0.575275
2.10067	2.44402	0.941086
2.2334	2.63965	0.933457
2.16225	2.67877	0.89512
2.12191	2.46882	0.998669
1.59268	1.8173	0.99141
0.975022	1.32465	0.820851
0.8978	1.30969	0.775934
0.991094	1.46386	0.740072
1.18662	1.8765	0.694249
0.913242	1.44336	0.713228
0.569812	1.03417	0.618299
1.0722	1.622	0.745364
1.17001	1.57634	0.822721
1.35004	1.75806	0.889298
1.53757	1.75865	0.997846
1.06099	1.43848	0.831638
1.24666	1.54441	0.959255
0.906904	1.30141	0.78503
0.843367	1.29913	0.707451
1.44045	2.01712	0.79202
0.93702	1.41859	0.774173
2.28685	2.66477	0.938363
1.26063	1.69003	0.886147
1.32289	1.76276	0.867264
1.31177	1.78195	0.850391
2.29429	2.89377	0.865871
1.99552	2.15758	1.03034
2.20516	2.49386	0.975854
0.849598	1.27394	0.734856
1.45389	1.96328	0.84434
1.48999	1.75884	0.938774
1.51008	1.63369	1.005
1.33176	1.70835	0.89179
1.50898	1.86624	0.893937
1.46135	1.85588	0.867003
[truncated: 861 more rows]
